# Supplementary material for: An alternative reaction pathway triggered by oxygen vacancies for boosting selective hydrodeoxygenation reactions
Source: Royal Society of Chemistry journal article supplement (doi:10.1039/d3gc02217j), 2023-01-01

## Support information

### **Alternative reaction pathway triggered by oxygen vacancies for boosting selective hydrodeoxygenation reactions**

Anqiu Liu,<sup>†a</sup> Xixi Liu,<sup>†b</sup> Yaping She,<sup>a</sup> Xiaoqiang Hu,<sup>b</sup> Miao Hu,<sup>a</sup> Zehui Zhang,<sup>\*b</sup> Xiaochen Wang<sup>\*a</sup>  
and Bing Liu<sup>\*b</sup>

<sup>a</sup> School of Energy Materials and Chemical Engineering, Hefei University, Hefei 230601, China

<sup>b</sup>Key Laboratory of Catalysis and Materials Sciences of the Ministry of Education, South-Central Minzu University, Wuhan 430074, PR China.

#### **\*Corresponding Authors**

\* Tel: +86-027-67842752

mail:[zehuizh@mail.ustc.edu.cn](mailto:zehuizh@mail.ustc.edu.cn)(Z. Zhang), [wxc@hfuu.edu.cn](mailto:wxc@hfuu.edu.cn)(X. Wang),

[liubing@mail.scuec.edu.cn](mailto:liubing@mail.scuec.edu.cn) (B. Liu).

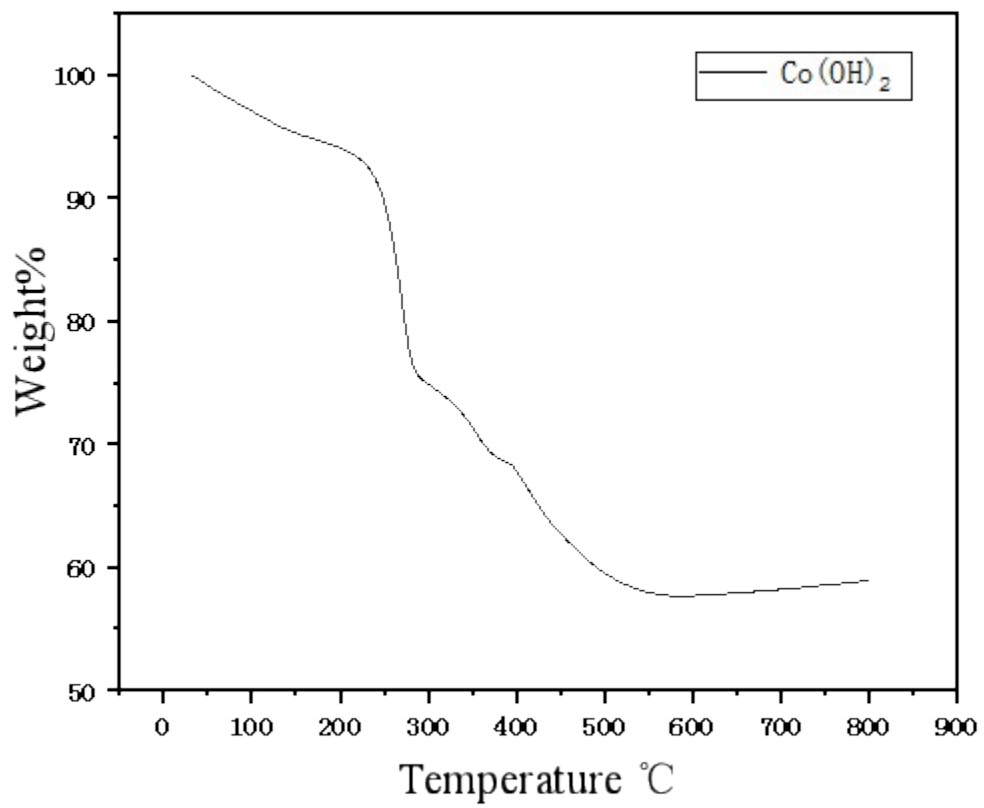

**Fig.S1.** TG curves of  $\text{Co}(\text{OH})_2$  precursor in the flowing  $\text{N}_2$ ,  $5\text{ }^\circ\text{C min}^{-1}$ .

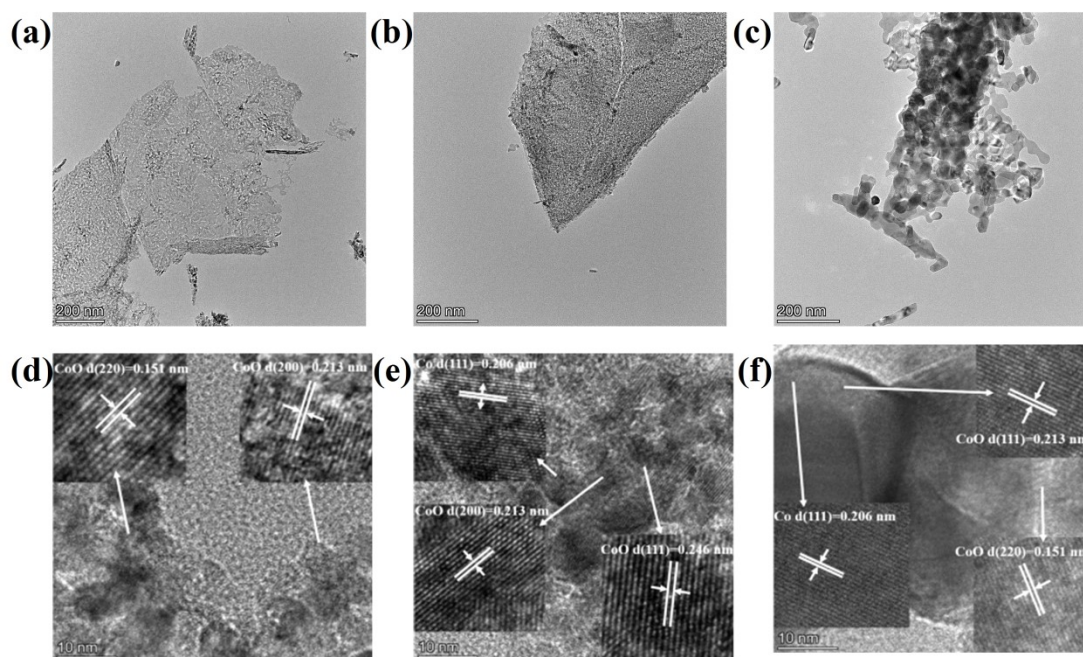

**Fig. S2.** Electron micrograph of *as*-prepared Co/CoO<sub>x</sub>-V-T catalysts. (a-c) TEM images of CoO<sub>x</sub>-V-300, Co/CoO<sub>x</sub>-V-400 and Co/CoO<sub>x</sub>-V-500, respectively; (d-f) HR-TEM images of CoO<sub>x</sub>-V-300, Co/CoO<sub>x</sub>-V-400 and Co/CoO<sub>x</sub>-V-500, respectively.

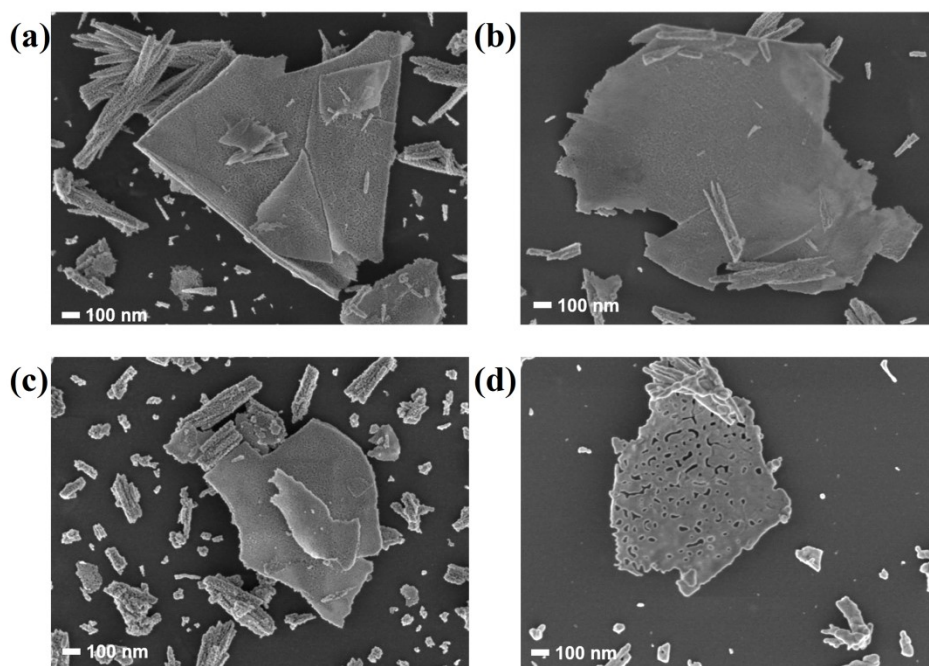

**Fig. S3.** SEM images of *as*-prepared Co/CoO<sub>x</sub>-V-T catalysts. (a) CoO<sub>x</sub>-V-300; (b) Co/CoO<sub>x</sub>-V-350; (c) Co/CoO<sub>x</sub>-V-400; and (d) Co/CoO<sub>x</sub>-V-500.

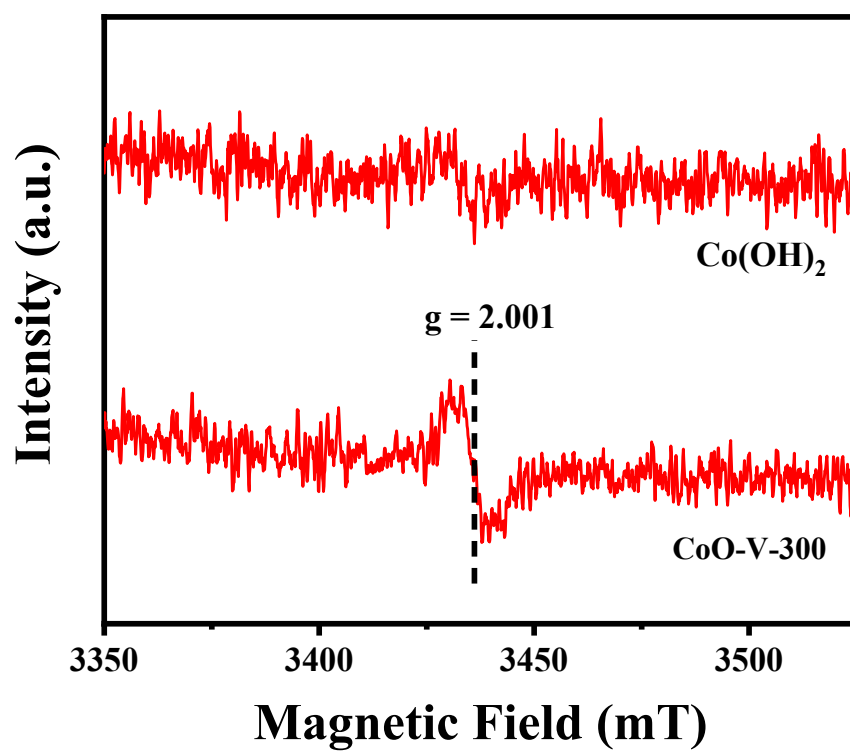

Fig. S4. EPR spectra of Co(OH)<sub>2</sub> and CoO<sub>x</sub>-V-300.

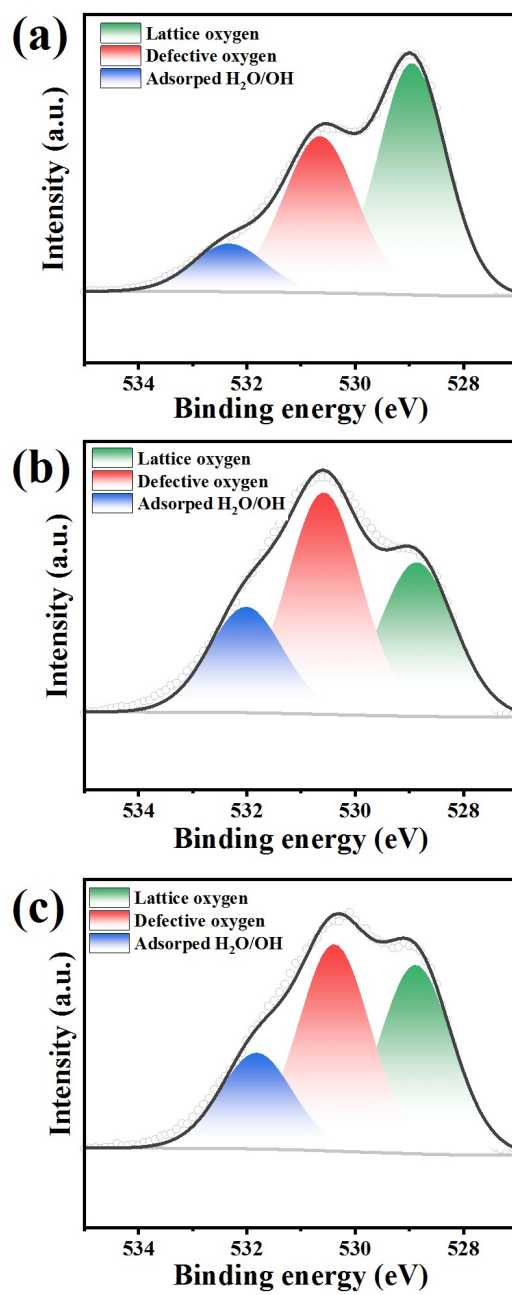

**Fig. S5.** O 1s XPS spectra of the *as*-prepared catalysts. (a) CoO<sub>x</sub>-V-300; (b) Co/CoO<sub>x</sub>-V-400; (c) Co/CoO<sub>x</sub>-V-500.

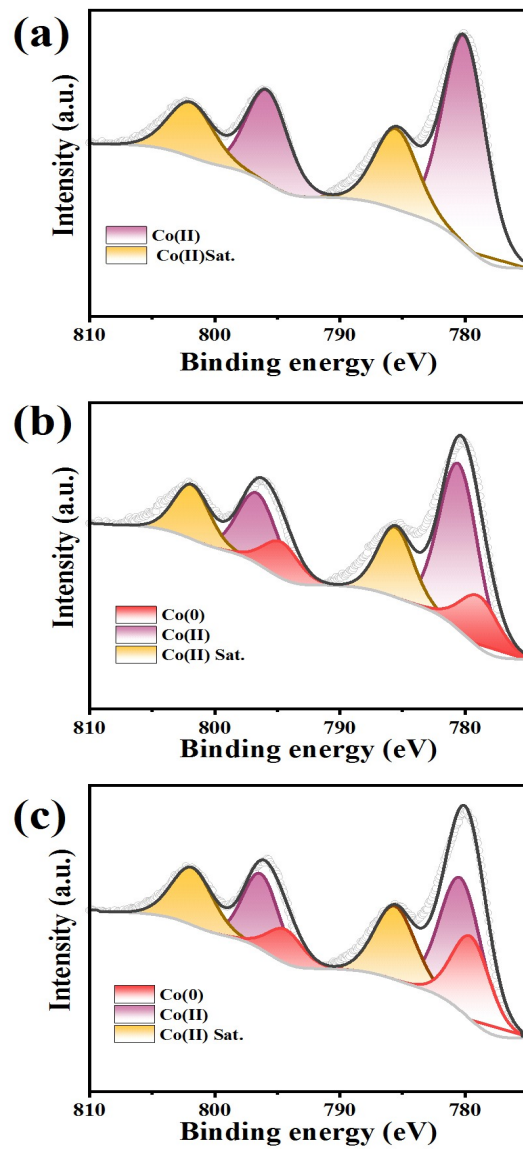

**Fig. S6.** Co 2p XPS spectra of the as-prepared samples. (a) CoO<sub>x</sub>-V-300; (b) Co/CoO<sub>x</sub>-V-400; (c) Co/CoO<sub>x</sub>-V-500.

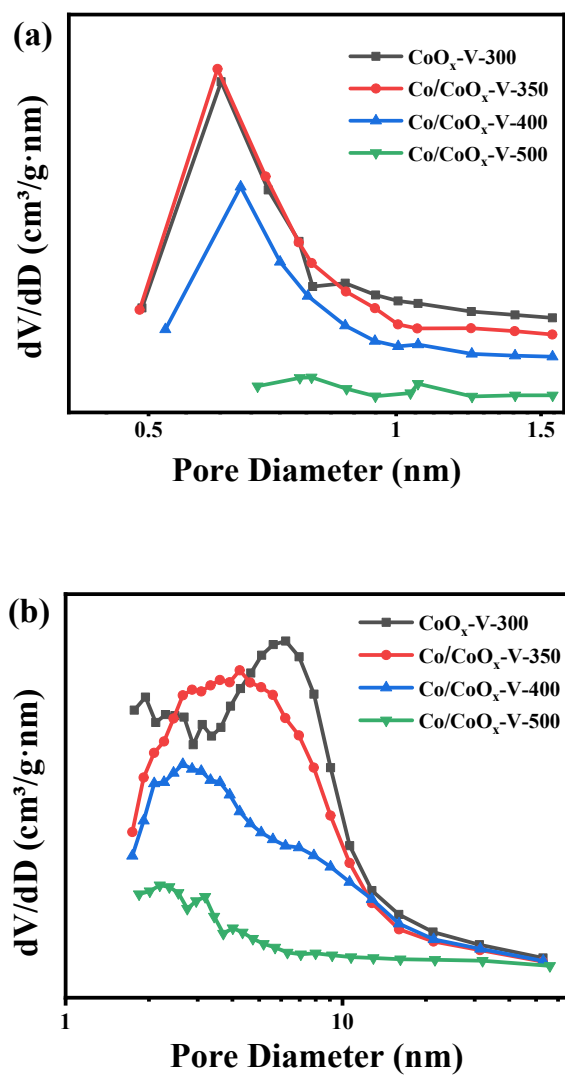

**Fig. S7.** (a) micropore and (b) mesoporous pore size distribution of the *as*-prepared catalysts.



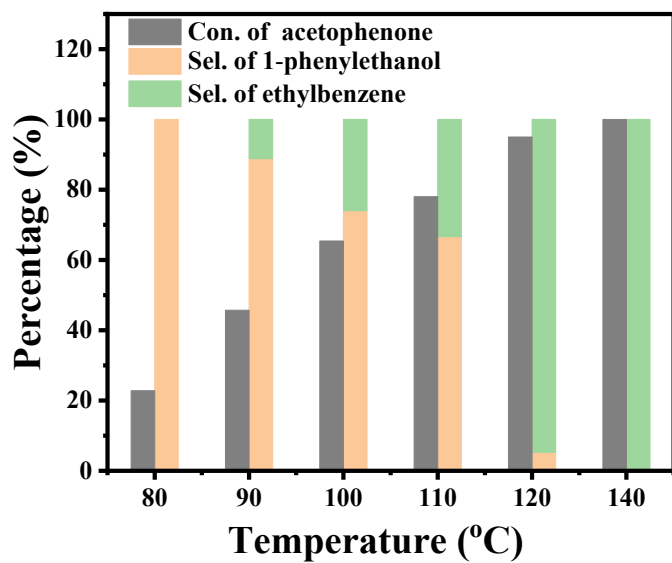

**Fig. S8.** The effect of reaction temperature on the hydrodeoxygenation of acetophenone. Reaction conditions: acetophenone (0.5 mmol), toluene (5 mL), Co/CoO-V-350 (20 mg), H<sub>2</sub> (10 bar), 4 h.

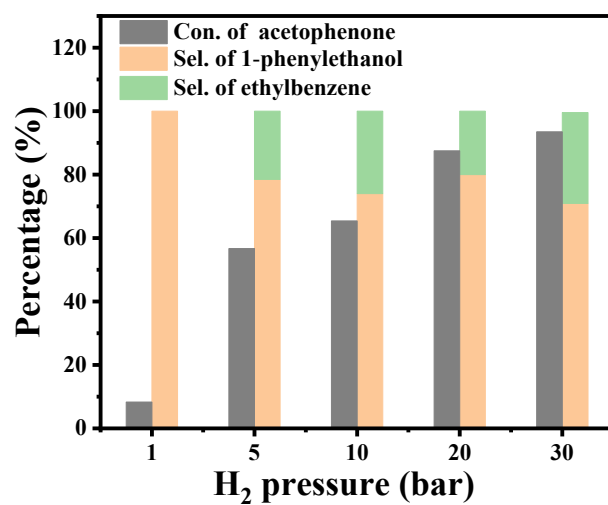

**Fig. S9.** The effect of H<sub>2</sub> pressure on the hydrodeoxygenation of acetophenone. Reaction conditions: acetophenone (0.5 mmol), toluene (5 mL), Co/CoO-V-350 (20 mg), 100 °C and 4 h.

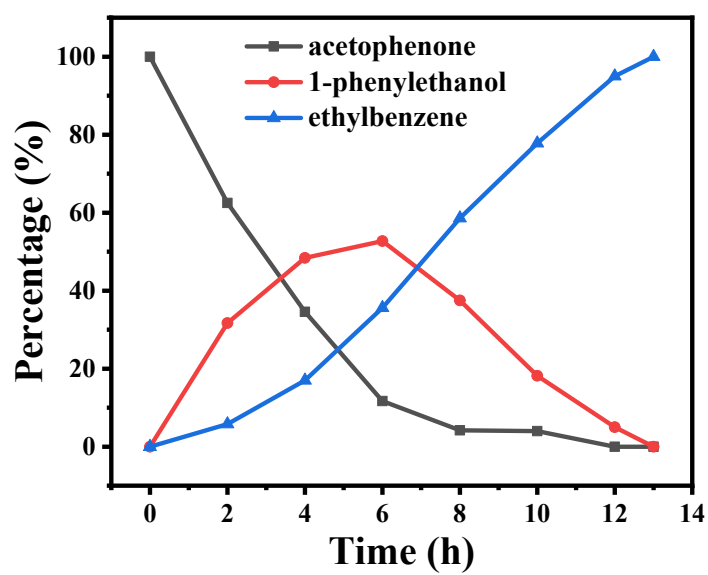

**Fig. S10.** Time distribution curve of the hydrodeoxygenation of acetophenone. Reaction conditions: acetophenone (0.5 mmol), 5 mL toluene, 20 mg catalyst, 10 bar  $H_2$ , 100°C.

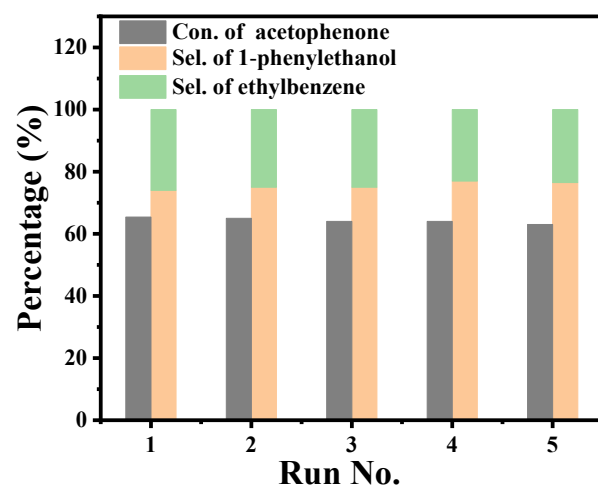

**Fig. S11.** Catalyst recycling experiments of the Co/CoO-V-350 catalyst. Reaction conditions: acetophenone (0.5 mmol), 5 mL toluene, 20 mg catalyst, 10 bar H<sub>2</sub>, 100°C and 4 h.

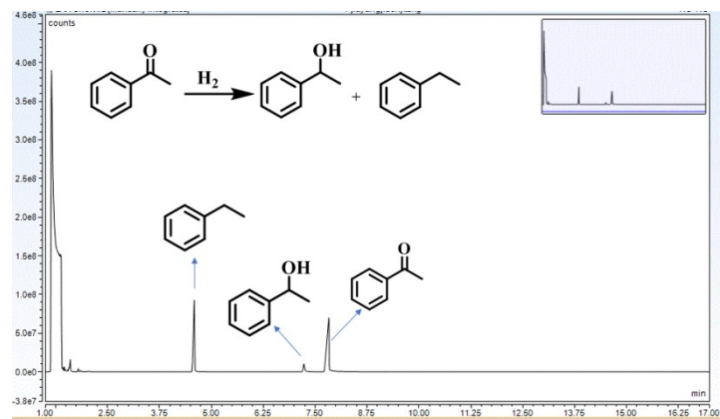

**Fig. S12.** GC-Mass spectra of the result of hydrodeoxygenation of acetophenone. Reaction conditions: acetophenone (0.5 mmol), 5 mL toluene, 20 mg catalyst, 10 bar H<sub>2</sub>, 100 °C and 4 h.

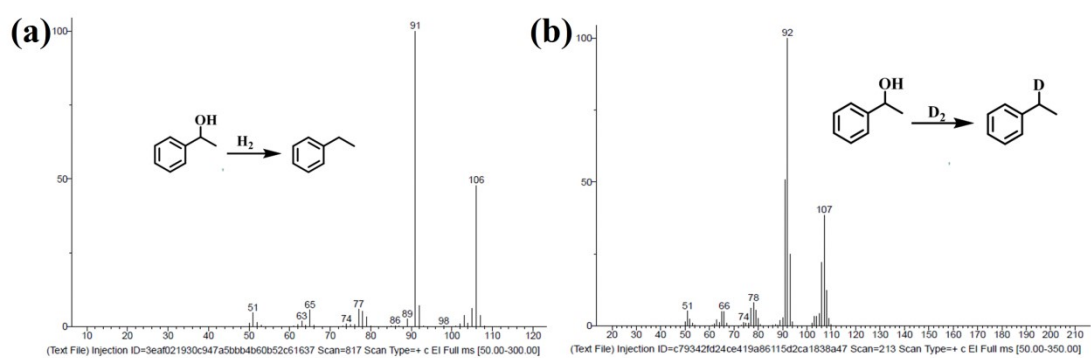

**Fig. S13.** Mass spectra of the product from isotope labeling experiments. Reaction conditions: 1-phenylethanol (0.5 mmol), 5 mL toluene, 20 mg catalyst, 120 °C and 12 h. (a) 10 bar H<sub>2</sub>; (b) 3 bar D<sub>2</sub>.

**Table S1.** The Co particles size calculated by Scherrer equation

| Catalyst                 | Co particles size(nm) |
|--------------------------|-----------------------|
| Co/CoO-V-350             | 15.6                  |
| Co/CoO-V-400             | 22.0                  |
| Co/CoO-V-500             | 26.2                  |
| CoO-V-300-H <sub>2</sub> | 28.9                  |

**Table S2.** The binding energy and relative peak area percentage of different types of oxygen.

| Catalyst     | Lattice oxygen |                | Defective oxygen |                | Adsorbed H <sub>2</sub> O/OH |                |
|--------------|----------------|----------------|------------------|----------------|------------------------------|----------------|
|              | B.E. (eV)      | Percentage (%) | B.E. (eV)        | Percentage (%) | B.E. (eV)                    | Percentage (%) |
| CoO-V-300    | 529.8          | 46.4           | 531.4            | 30.7           | 532.4                        | 22.9           |
| Co/CoO-V-350 | 529.7          | 24.6           | 531.6            | 56.7           | 532.4                        | 18.7           |
| Co/CoO-V-400 | 529.7          | 17.5           | 531.6            | 44.4           | 532.4                        | 38.1           |
| Co/CoO-V-500 | 529.8          | 18.9           | 531.2            | 42.9           | 532.4                        | 38.2           |

**Table S3.** The peak area ratio of metallic Co and Co<sup>2+</sup> in the catalysts

| <b>Catalyst</b> | <b>Co<sup>0</sup> (%)</b> | <b>Co<sup>2+</sup> (%)</b> | <b>Peak area ratio of<br/>Co<sup>0</sup> to Co<sup>2+</sup></b> |
|-----------------|---------------------------|----------------------------|-----------------------------------------------------------------|
| CoO-V-300       | 0                         | 100                        | 0                                                               |
| Co/CoO-V-350    | 6.7                       | 93.3                       | 0.07                                                            |
| Co/CoO-V-400    | 13.5                      | 86.5                       | 0.16                                                            |
| Co/CoO-V-500    | 15.5                      | 84.5                       | 0.18                                                            |



**Table S4.** The textural parameters of the cobalt catalysts.

| Catalyst     | Surface Area (m <sup>2</sup> /g) |       |                    | Pore Volume (mL/g) |       |                   |
|--------------|----------------------------------|-------|--------------------|--------------------|-------|-------------------|
|              | Meso                             | Micro | Total surface area | Meso               | Micro | Total pore volume |
| CoO-V-300    | 81.0                             | 13.2  | 94.2               | 0.18               | 0.03  | 0.21              |
| Co/CoO-V-350 | 72.1                             | 6.2   | 78.3               | 0.15               | 0.001 | 0.15              |
| Co/CoO-V-400 | 50.5                             | 5.1   | 55.6               | 0.13               | 0.001 | 0.13              |
| Co/CoO-V-500 | 13.7                             | 4.6   | 18.3               | 0.04               | 0.003 | 0.04              |

**Table S5.** The binding energy and relative peak area percentage of different types of oxygen in the treated catalysts.

| Sample                     | Lattice oxygen |                | Defective oxygen |                | Adsorbed H <sub>2</sub> O/OH |                |
|----------------------------|----------------|----------------|------------------|----------------|------------------------------|----------------|
|                            | B.E. (eV)      | Percentage (%) | B.E. (eV)        | Percentage (%) | B.E. (eV)                    | Percentage (%) |
| Co/CoO-V-350               | 529.7          | 24.6           | 531.6            | 56.7           | 532.4                        | 18.7           |
| Treated by acetophenone    | 529.8          | 28.9           | 531.4            | 46.8           | 532.4                        | 24.1           |
| Treated by 1-phenylethanol | 529.8          | 31.2           | 531.3            | 34.5           | 529.8                        | 34.2           |

**Table S6.** The effect of the reaction solvents on the hydrodeoxygenation of acetophenone.

| 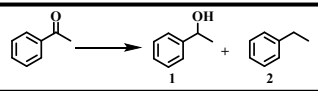 |          |               |               |
|-----------------------------------------------------------------------------------|----------|---------------|---------------|
| Solvents                                                                          | Con. (%) | Sel. of 1 (%) | Sel. of 2 (%) |
| Toluene                                                                           | 95.0     | 5.3           | 94.7          |
| <i>n</i> -Hexane                                                                  | 94.6     | 61.8          | 38.2          |
| Acetonitrile                                                                      | 10.3     | 100           | -             |
| Tetrahydrofuran                                                                   | 45.2     | 93.4          | 6.6           |
| MeOH                                                                              | 5.5      | 100           | -             |
| 1,4-Dioxane                                                                       | 3.2      | 100           | -             |
| Ethyl acetate                                                                     | 2.3      | 100           | -             |

**Reaction conditions:** acetophenone (0.5 mmol), solvent (5 mL), Co/CoO-V-350 (20 mg), H<sub>2</sub> (10 bar), 4 h.

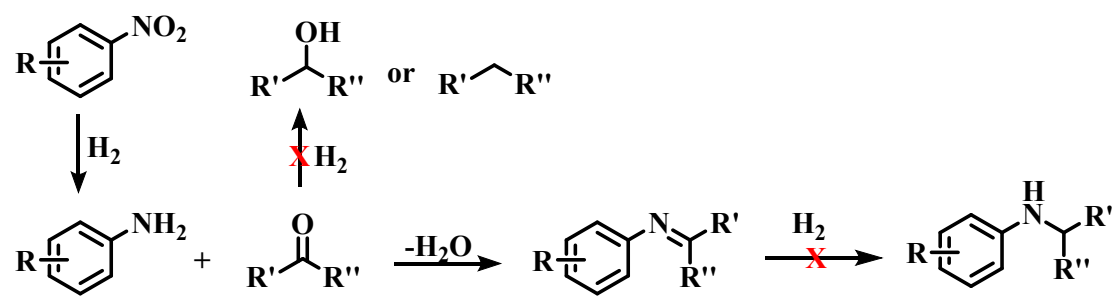

**Scheme S1.** Reaction pathways of the reductive coupling of nitro compounds with carbonyl compounds.

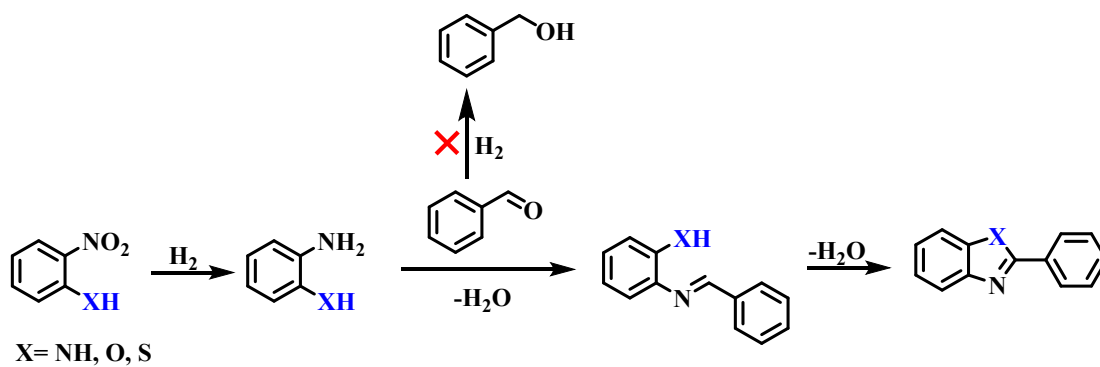

**Scheme S2.** Reaction pathways of the synthesis of benzazoles.

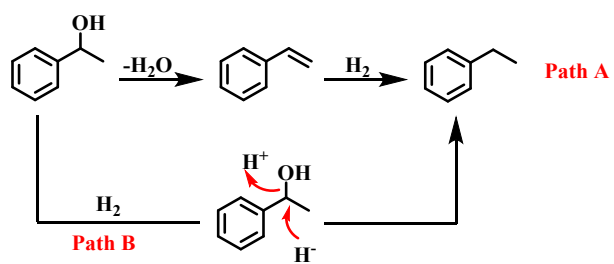

**Scheme S3.** The possible pathways the hydrodeoxygenation of 1-phenylethanol into ethylbenzene.

GC-MS data

(a)

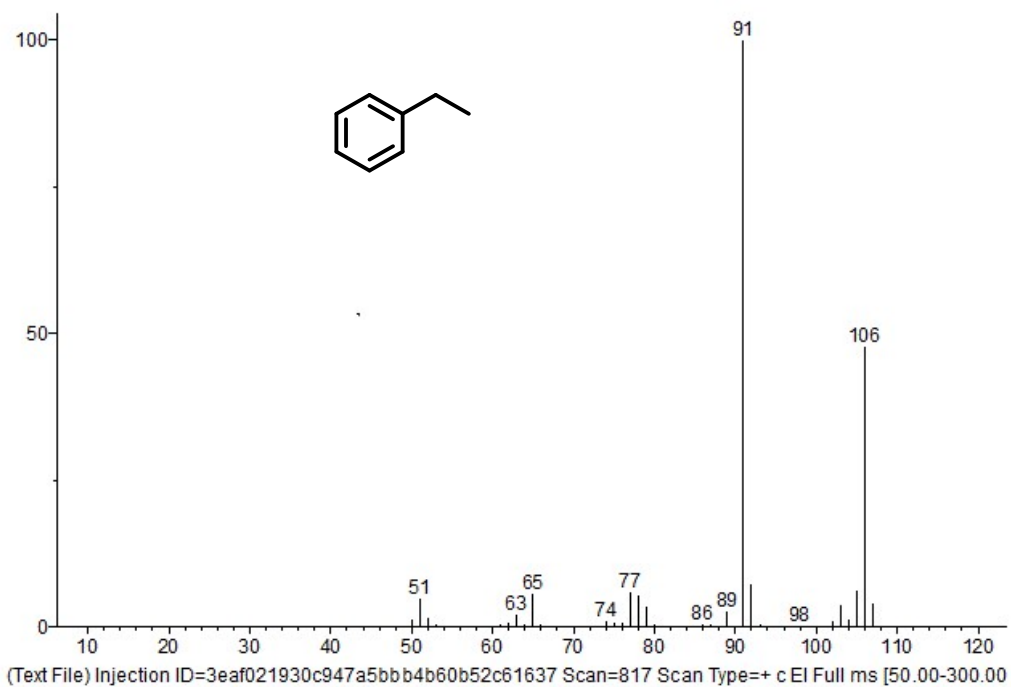

(a2)

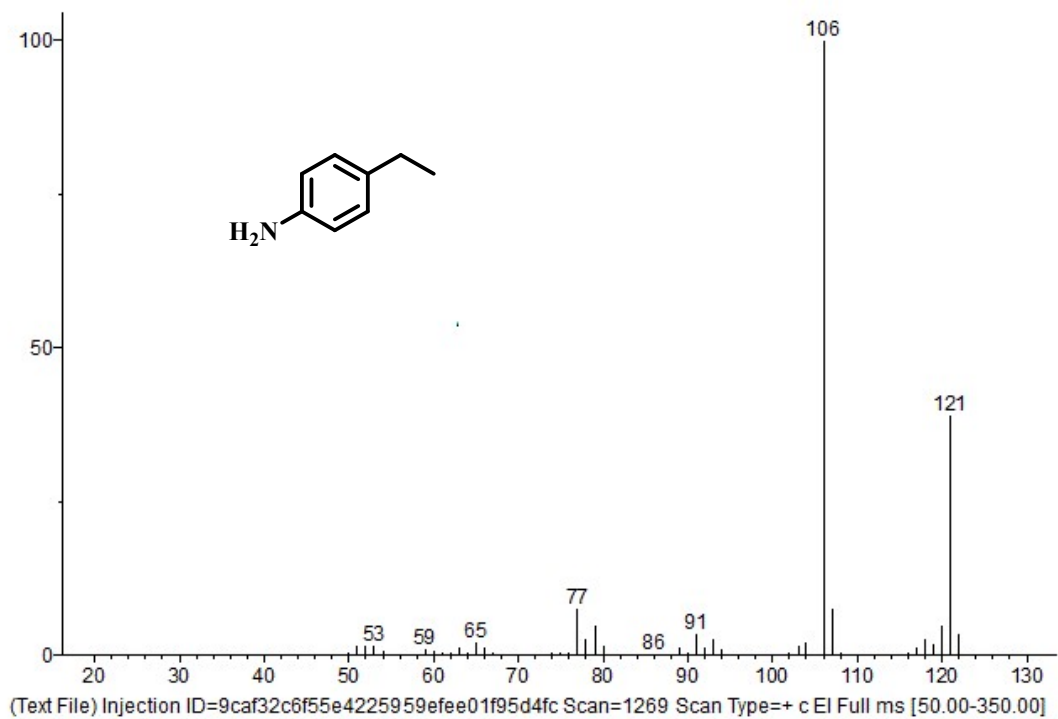



(a3)

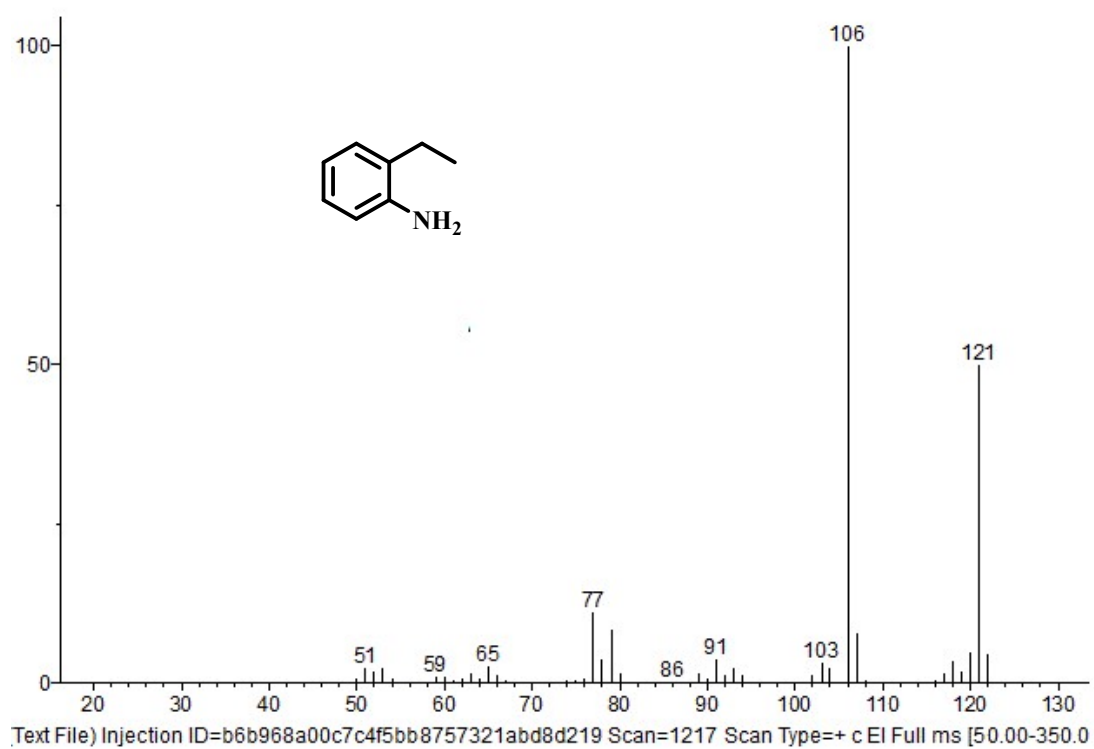

(a4)

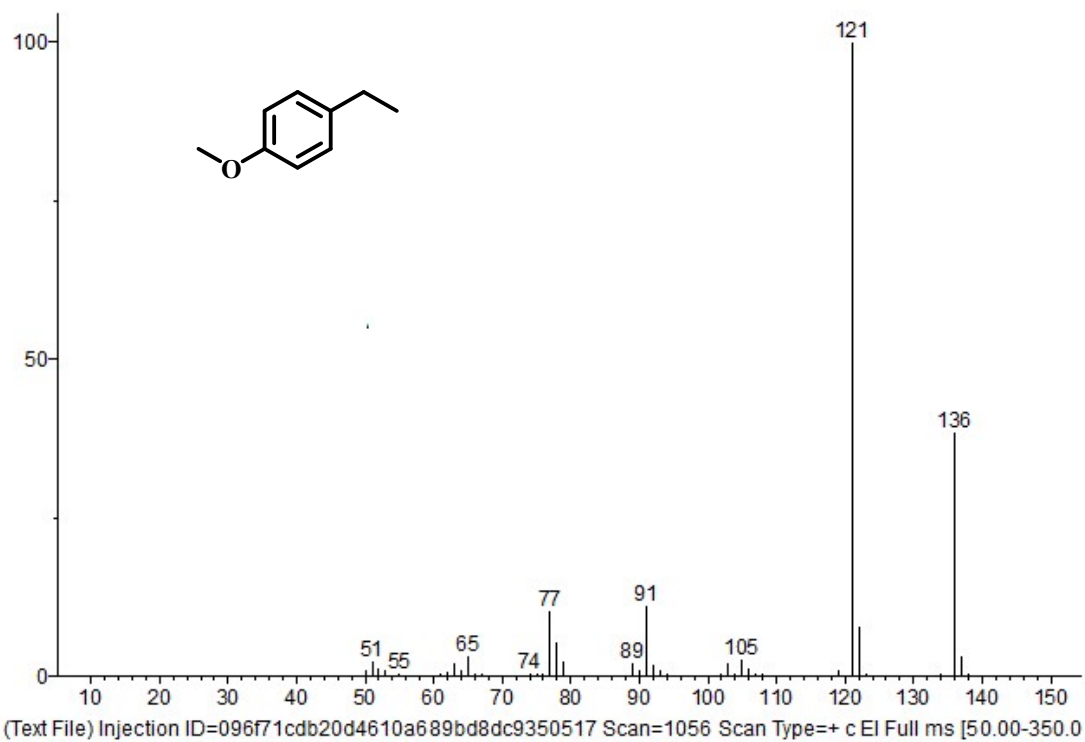

(a5)

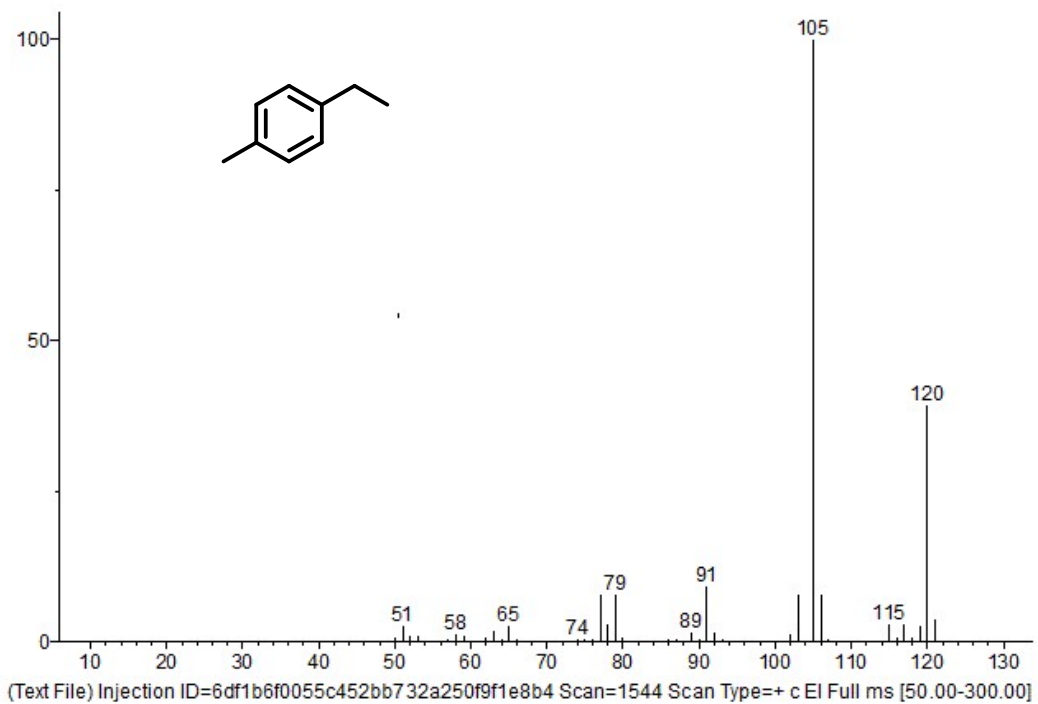

(a6)

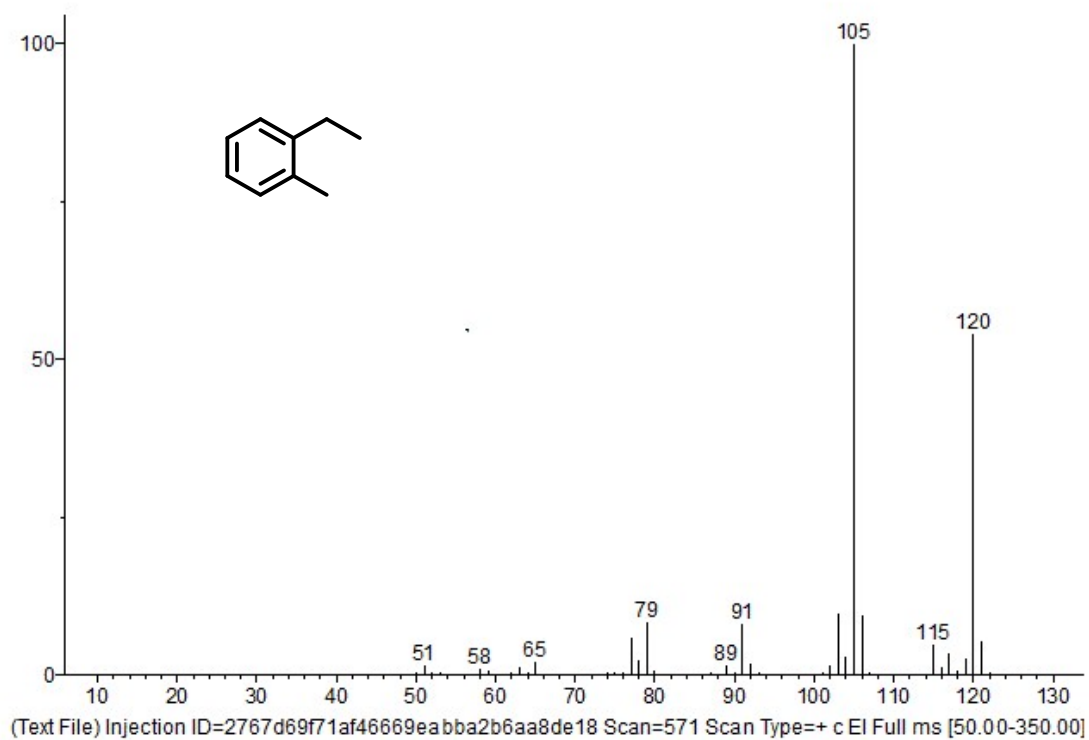

(a7)

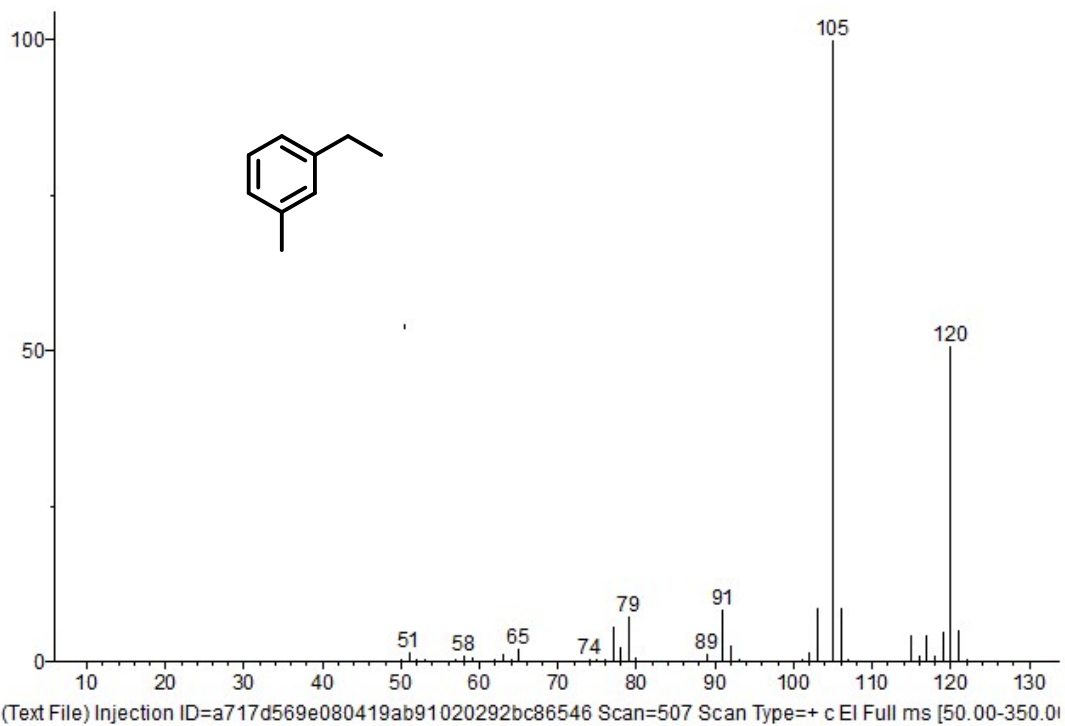

(a8)

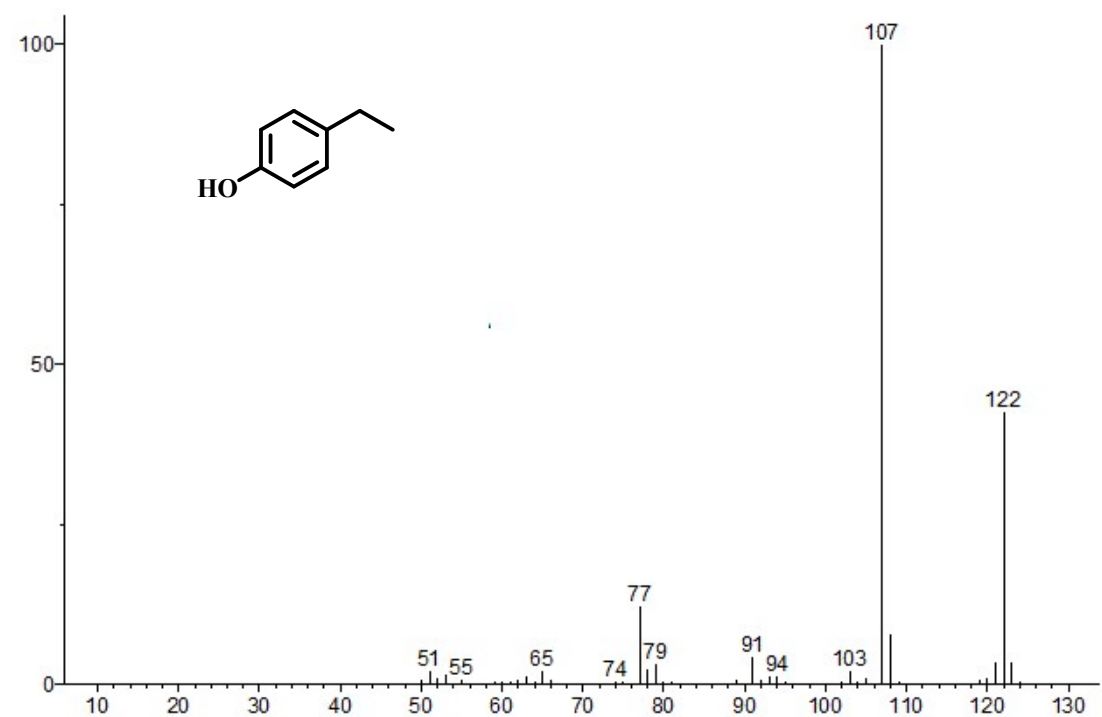

(Text File) Injection ID=158ebd61708c429b82925d558e1f4124 Scan=1275 Scan Type=+ c EI Full ms [50.00-350.0

(a9)

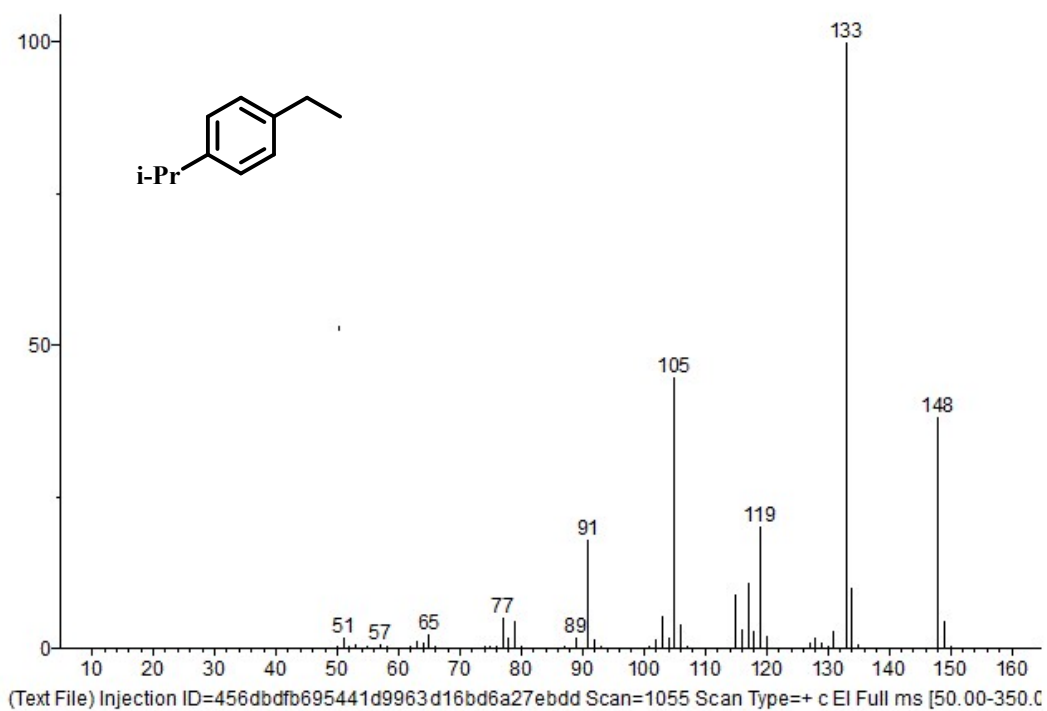

(a10)

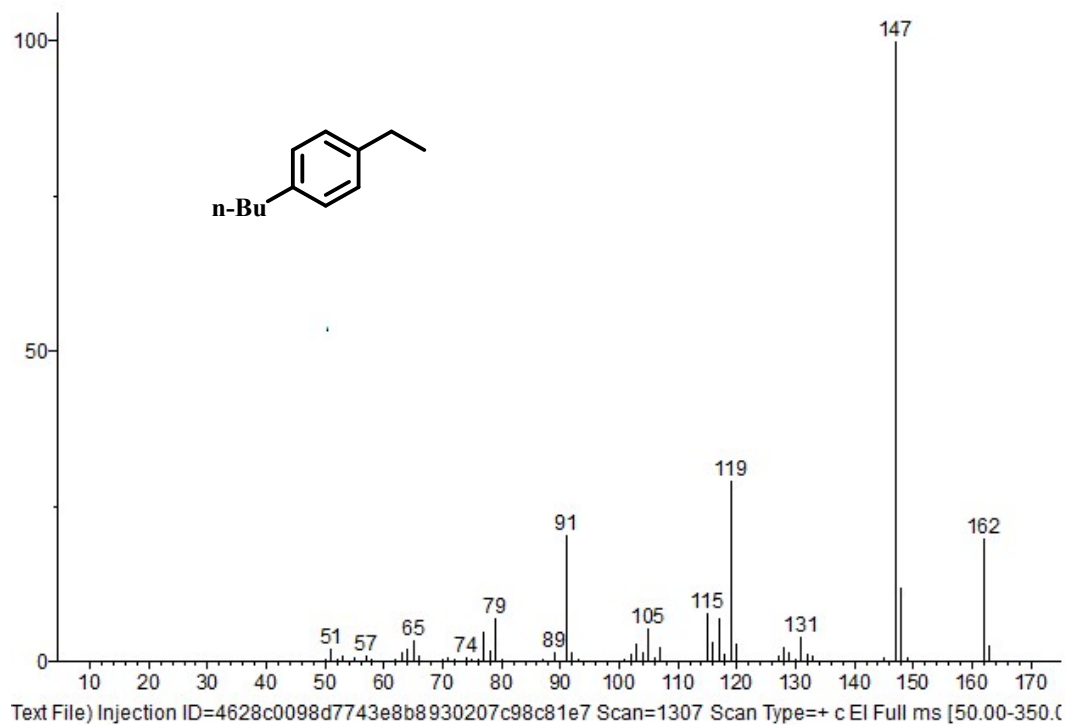



(a11)

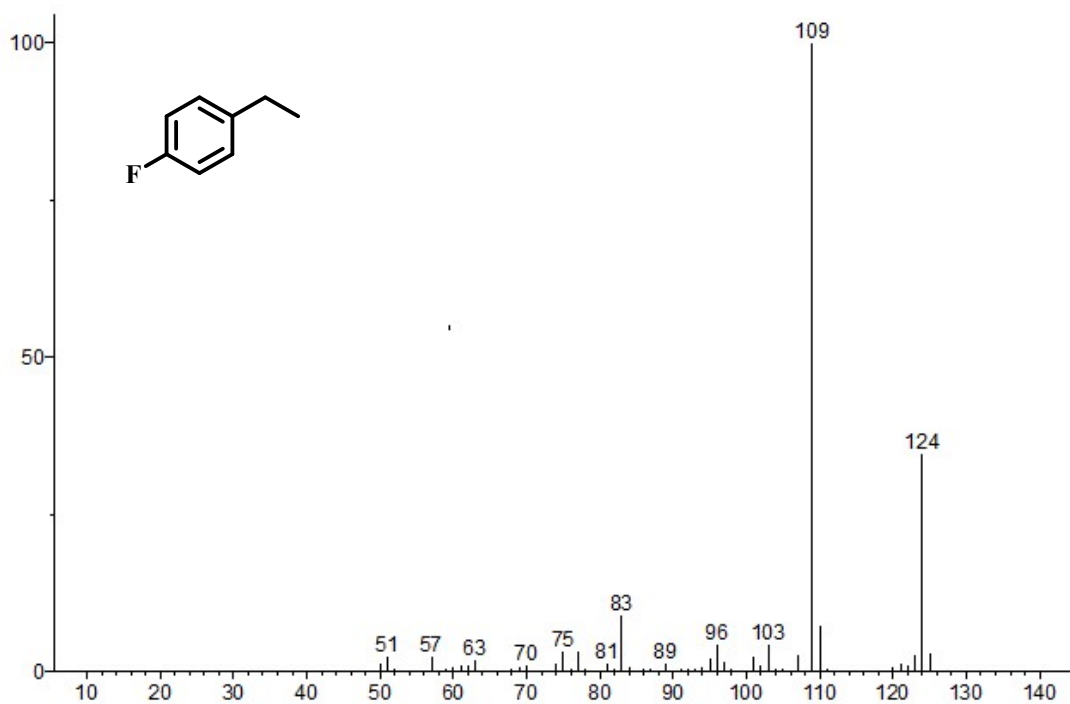

(Text File) Injection ID=f4b2947577a1432faed094dc71a5a51d Scan=937 Scan Type=+ c EI Full ms [50.00-300.00]

(a12)

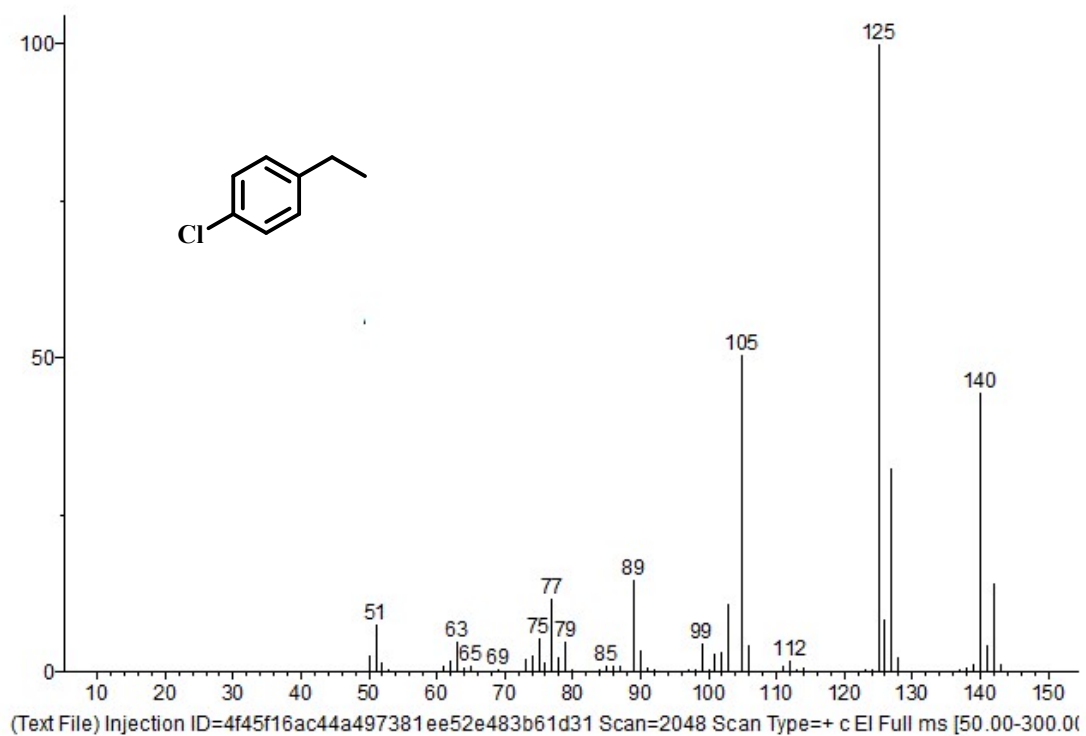

(a13)

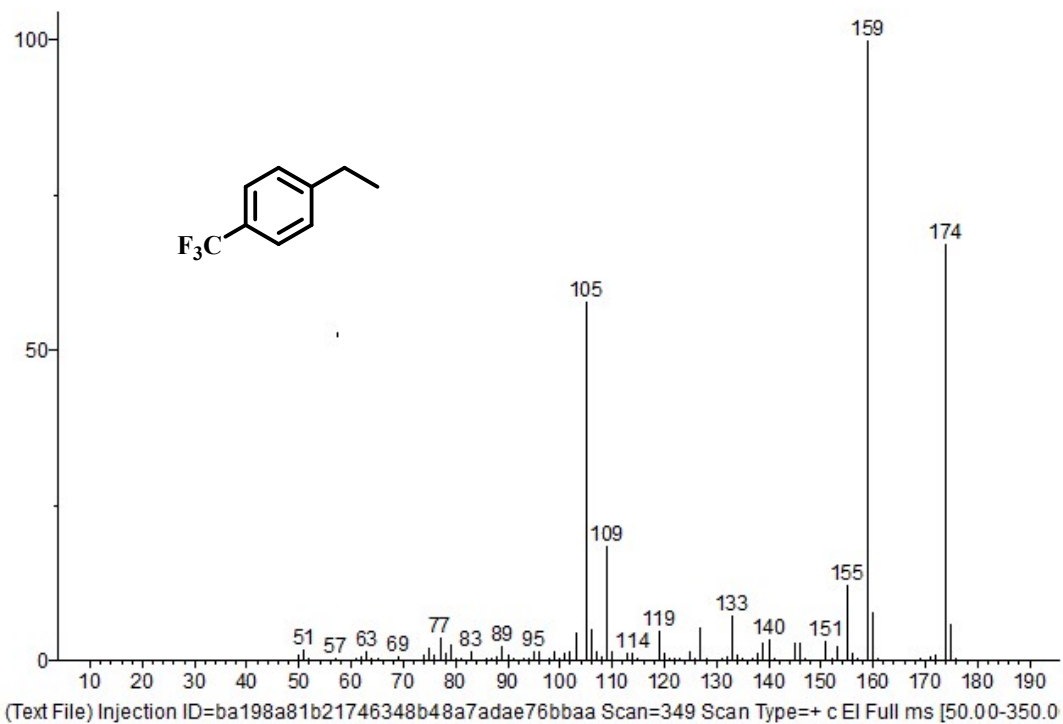

(a14)

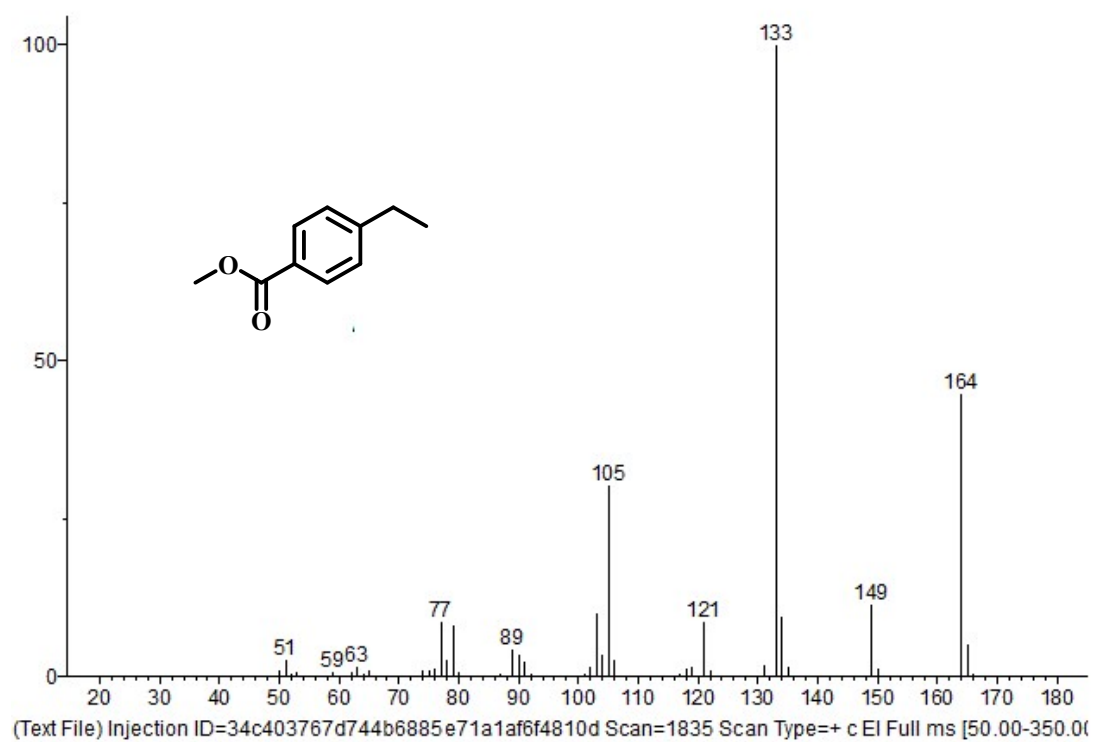

(a15)

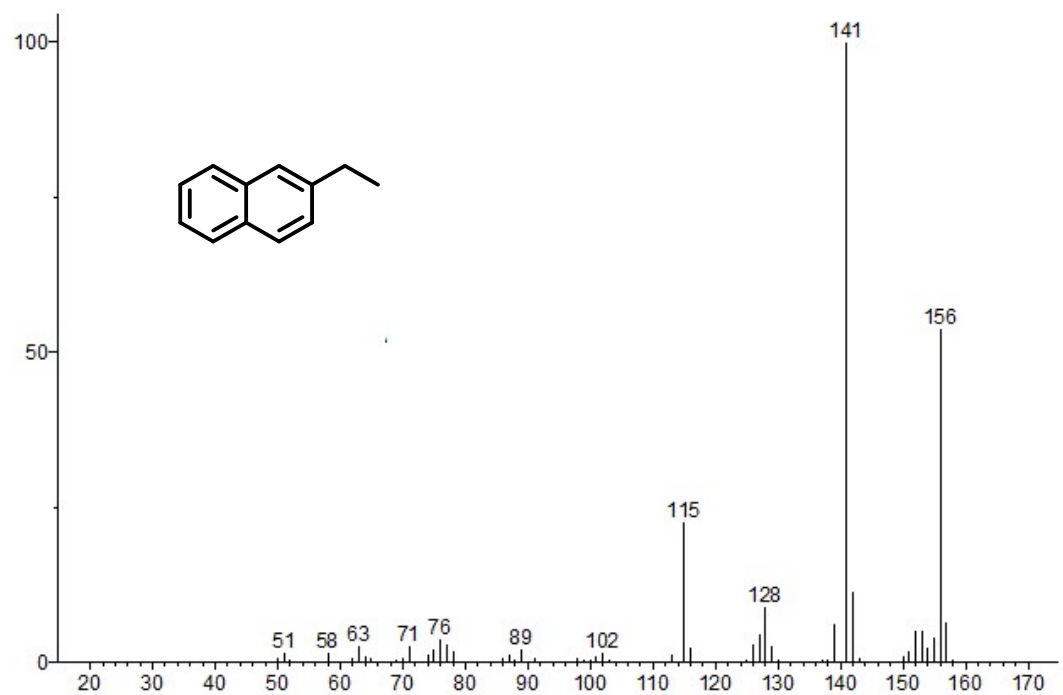

(Text File) Injection ID=735407bd3052418e8a0fe1f59292ced1 Scan=2126 Scan Type=+ c EI Full ms [50.00-350.00]

(a16)

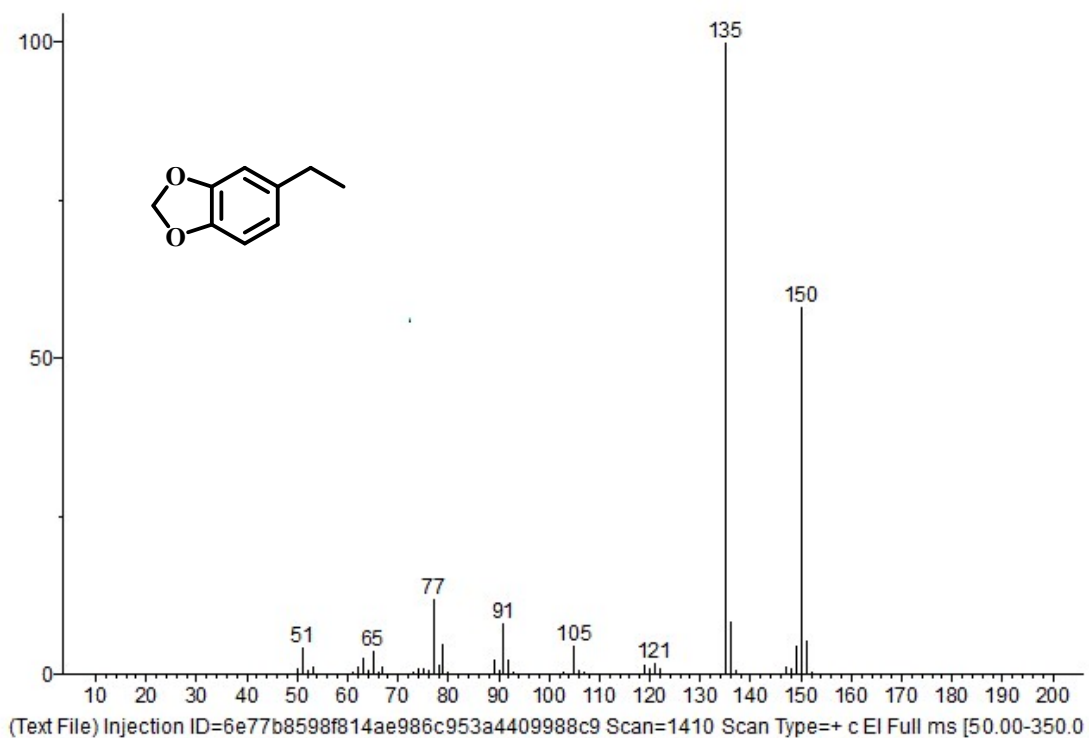

(a17)

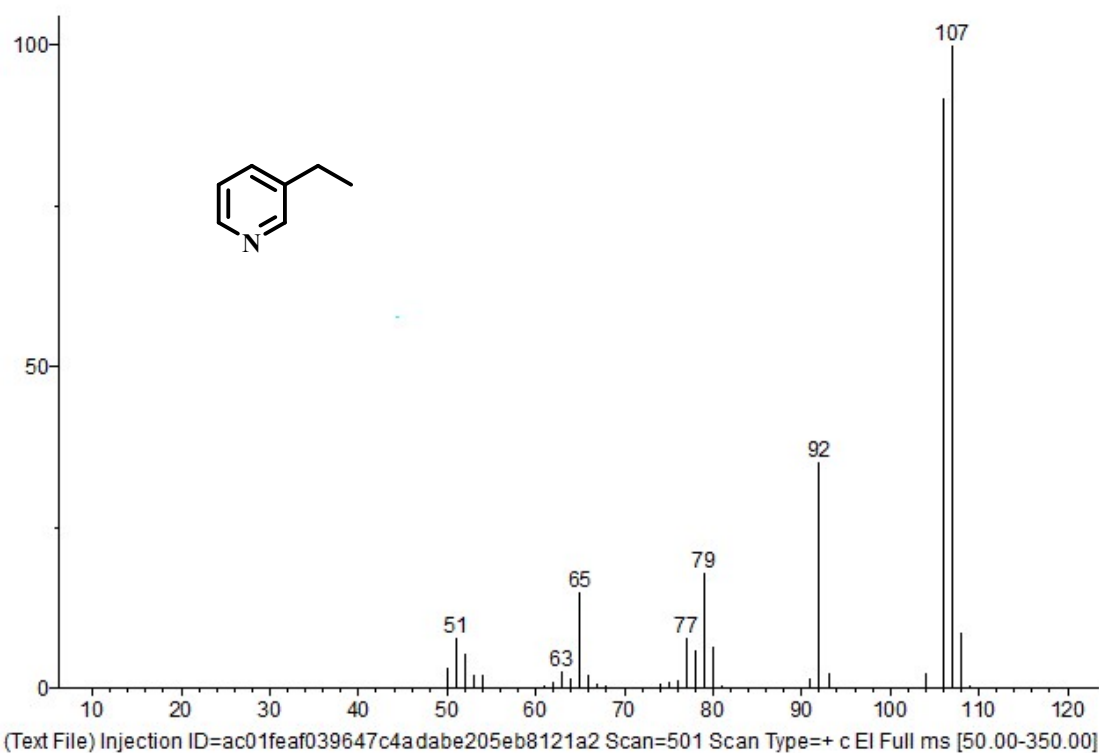

(a18)

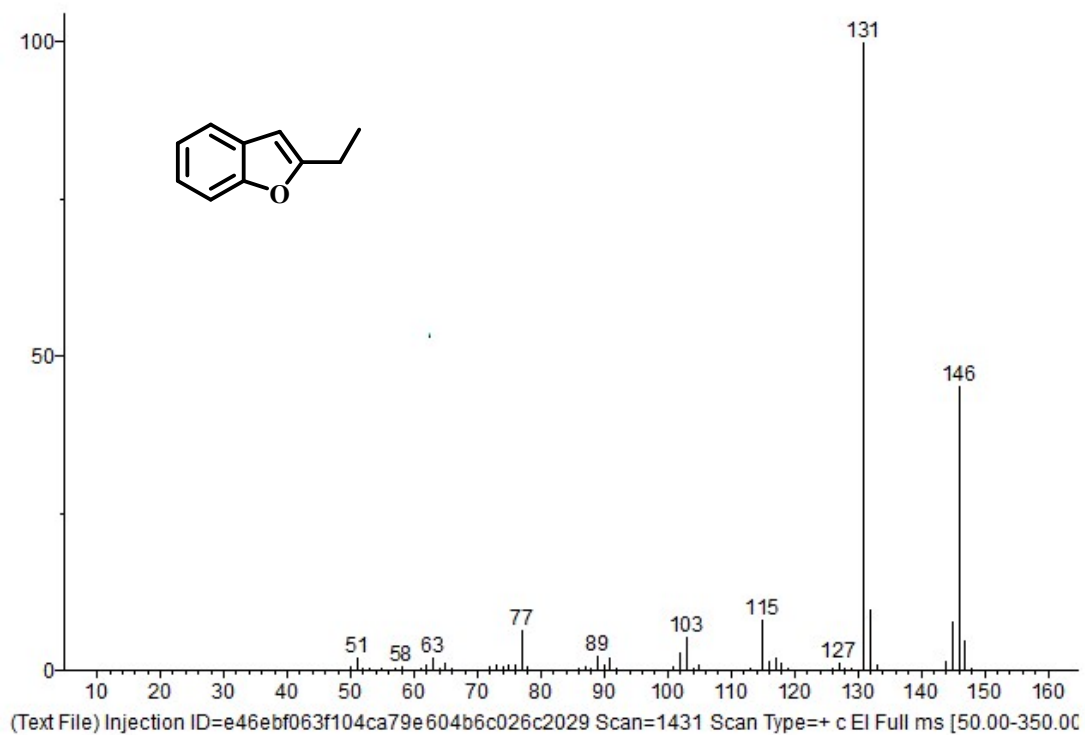



(a19)

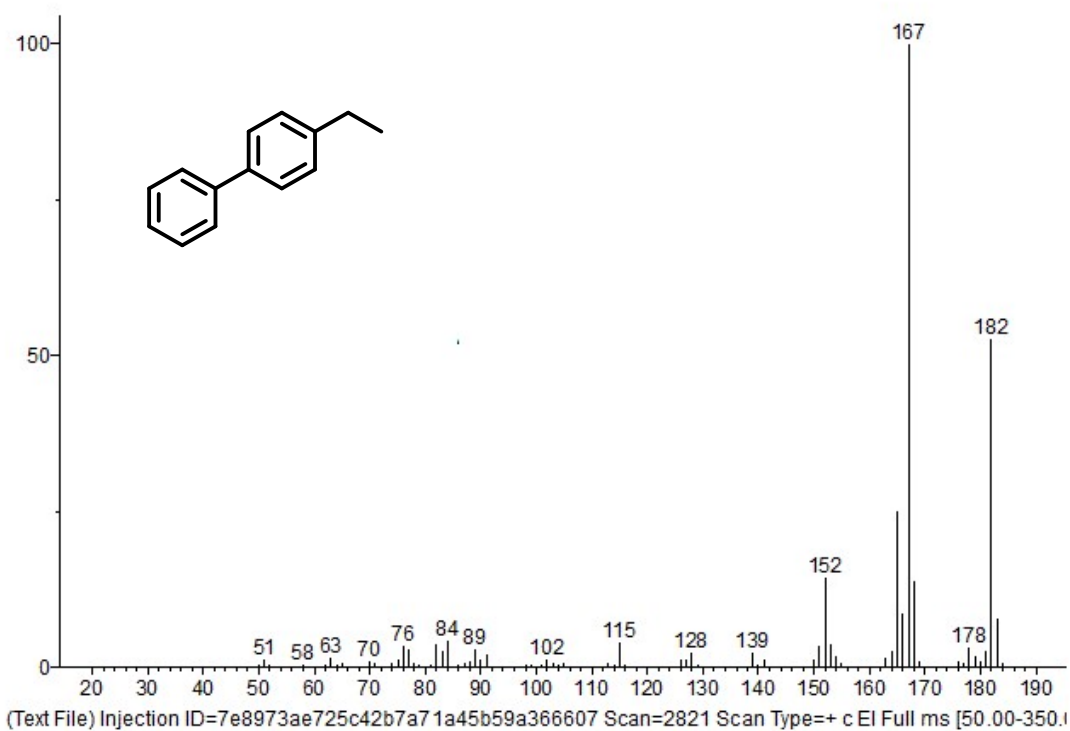

(a20)

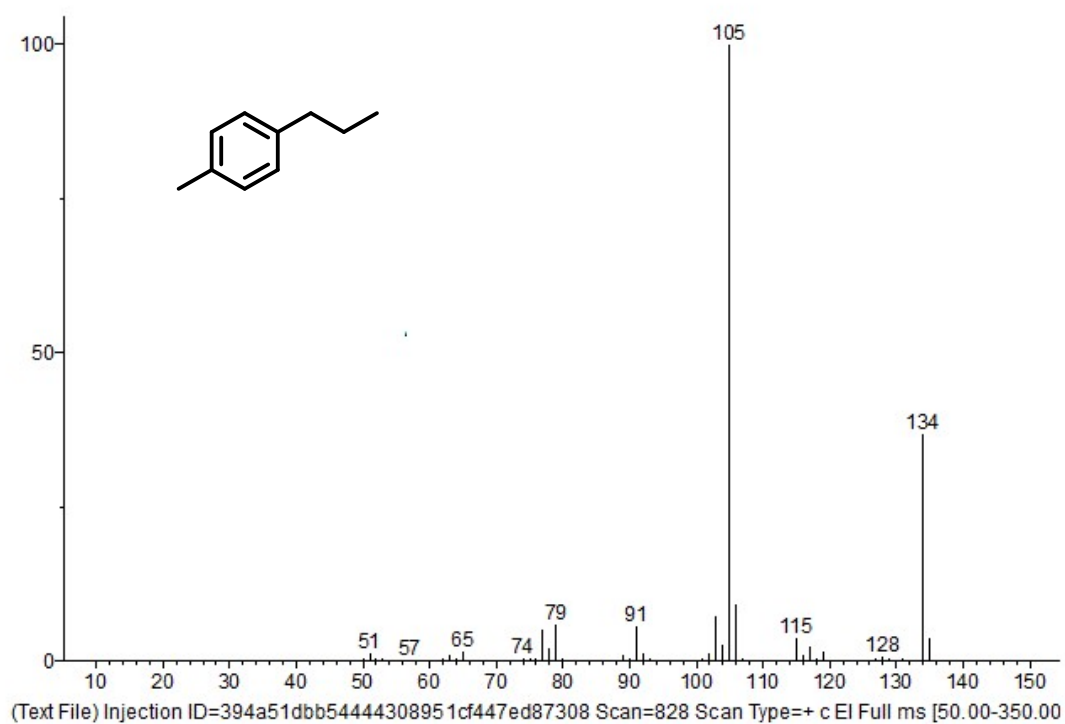

(a21)

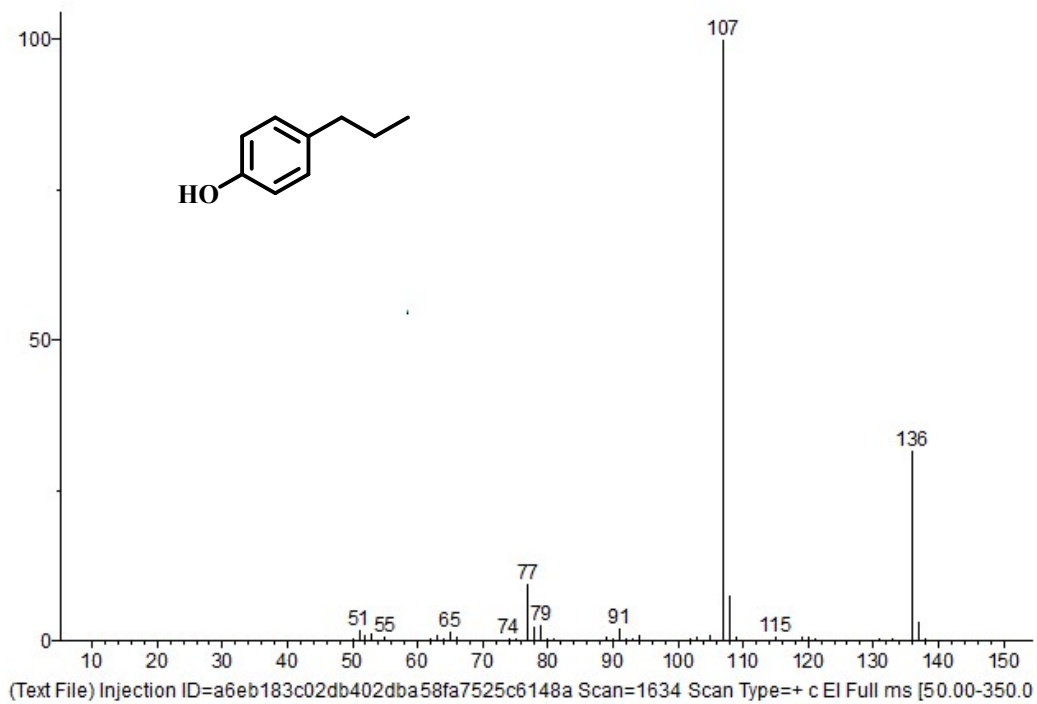

(a22)

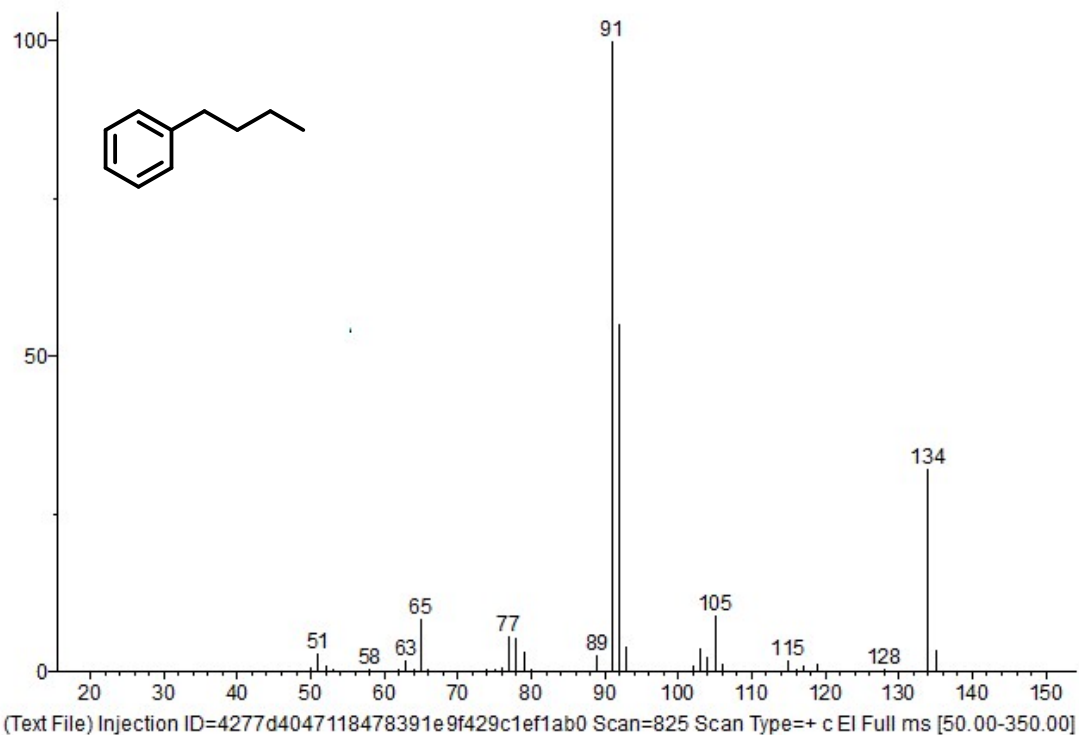

(a23)

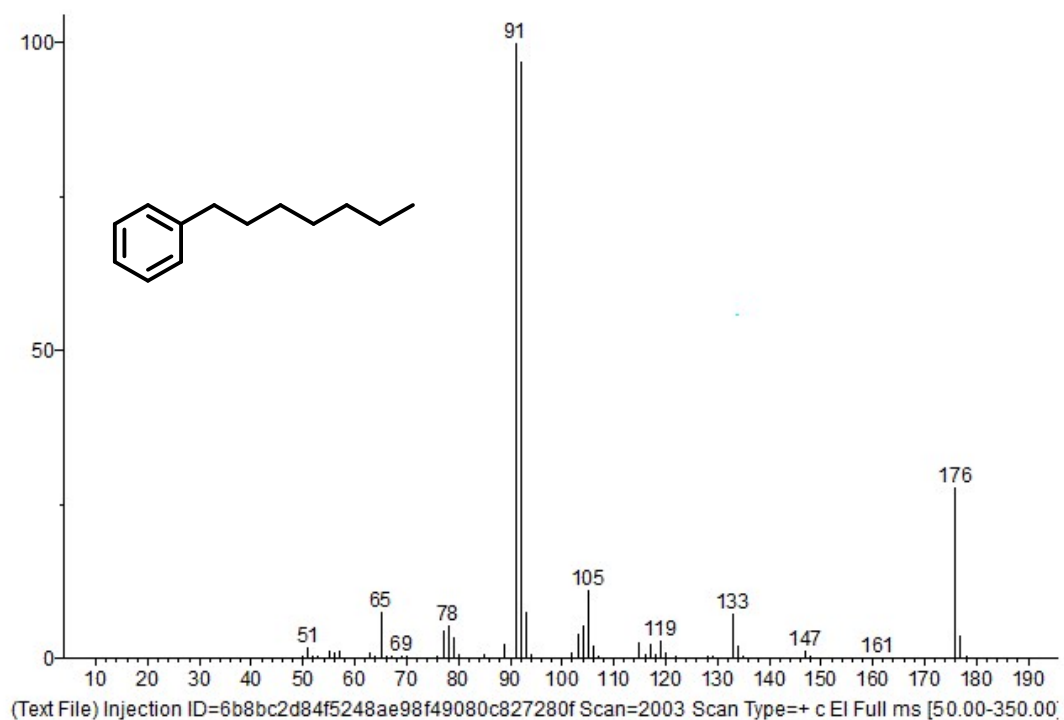

(a24)

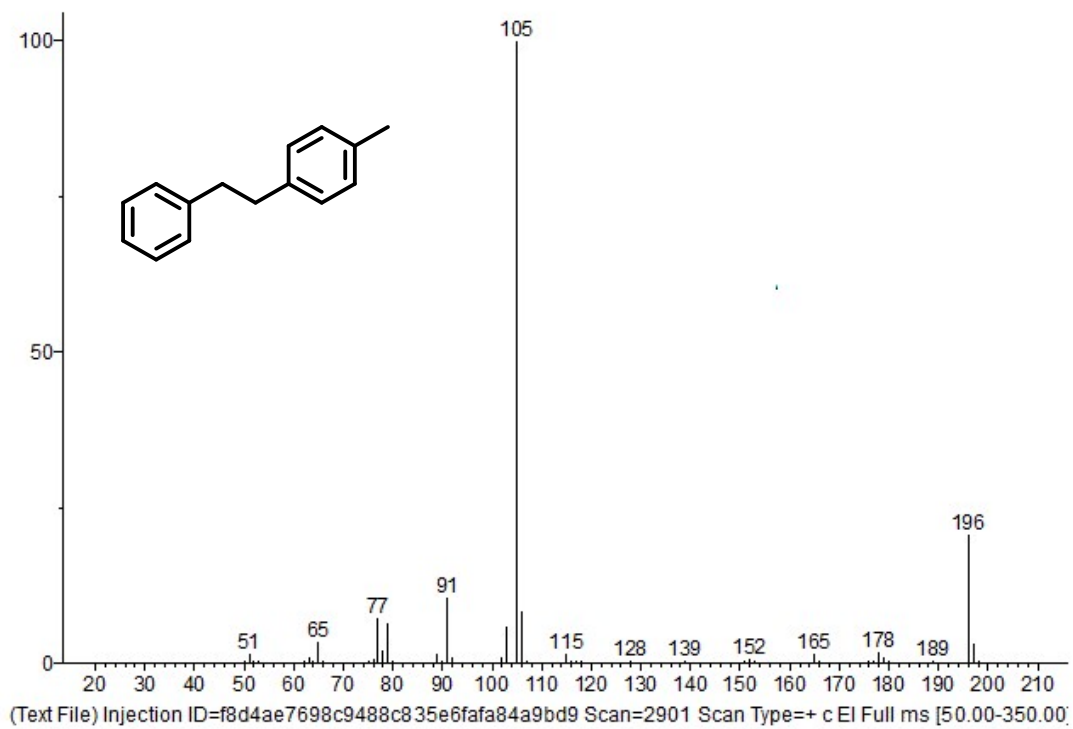

(a25)

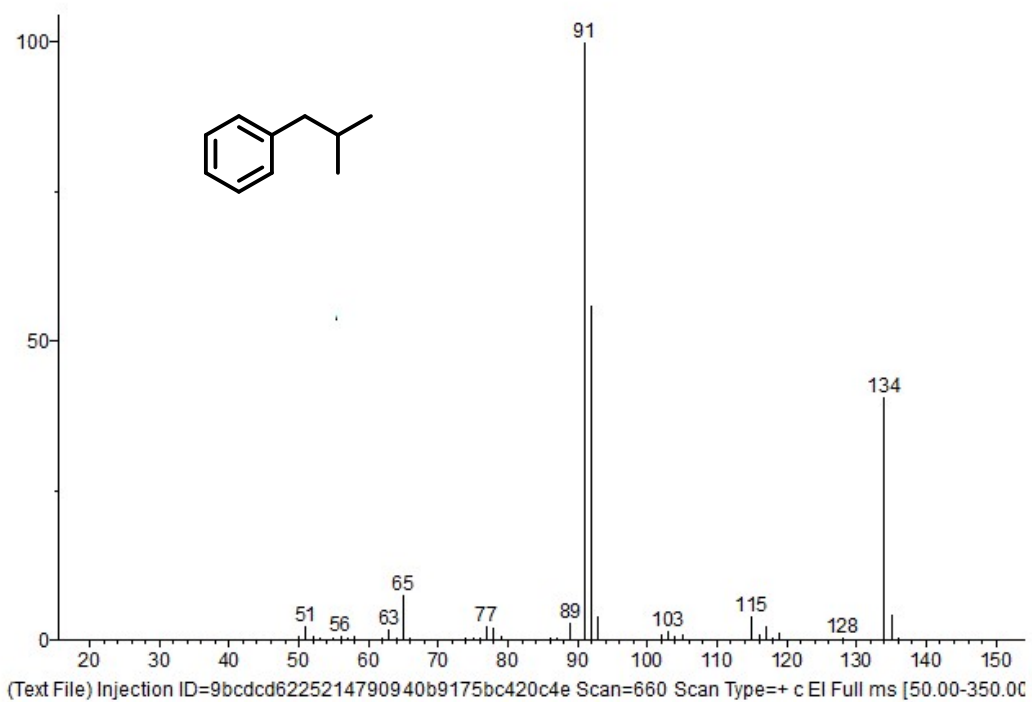

(a26)

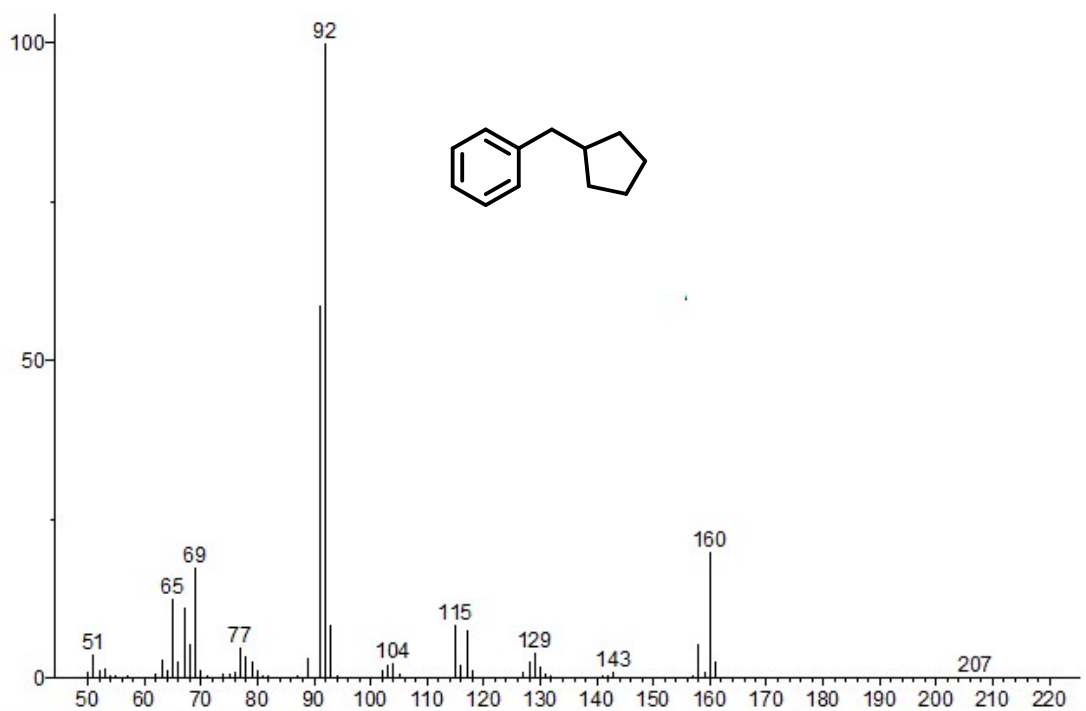

(Text File) Injection ID=a1781788b359491a8a7ba130471b1701 Scan=1773 Scan Type=+ c EI Full ms [50.00-350.00]



(a27)

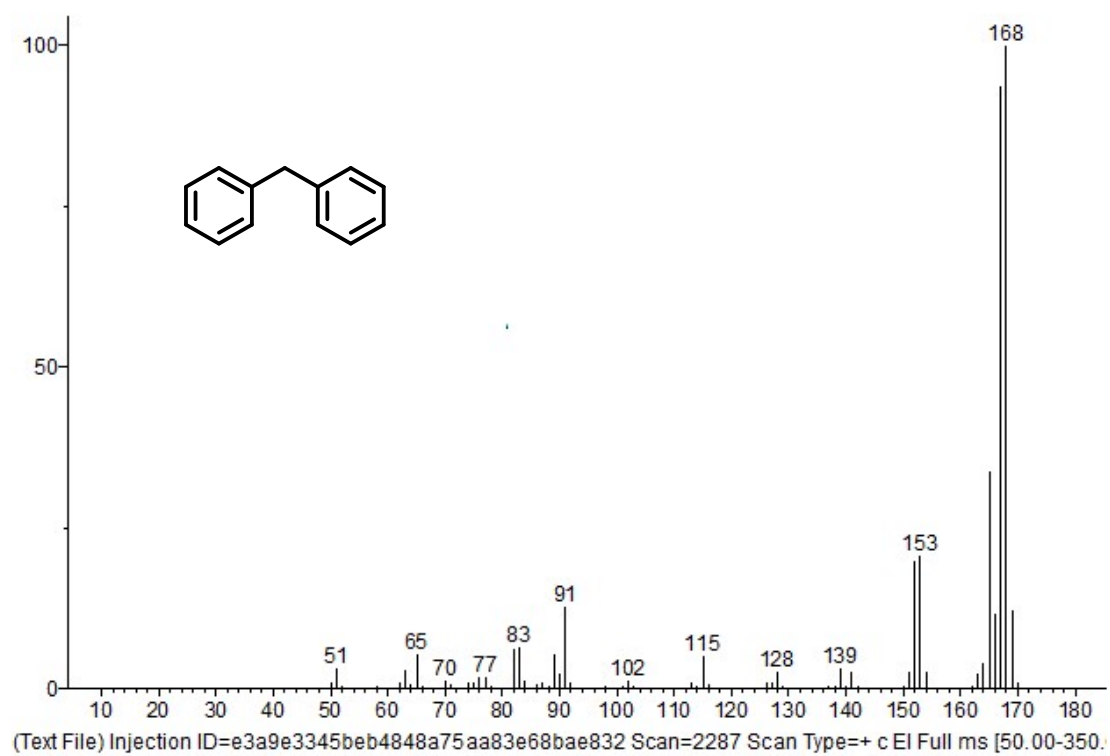

(a28)

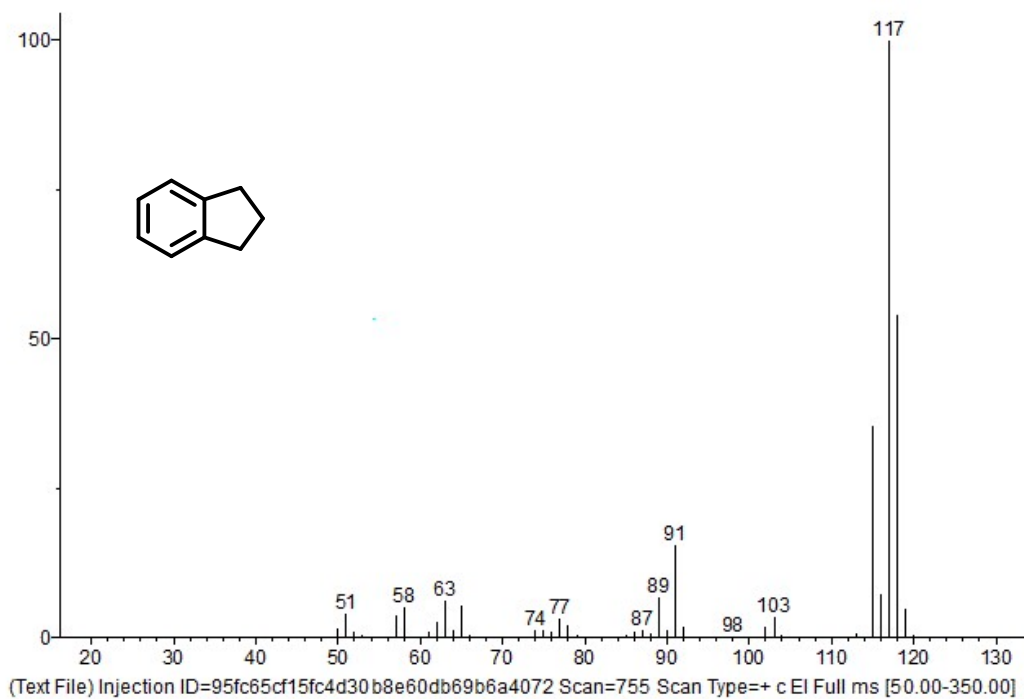

(a29)

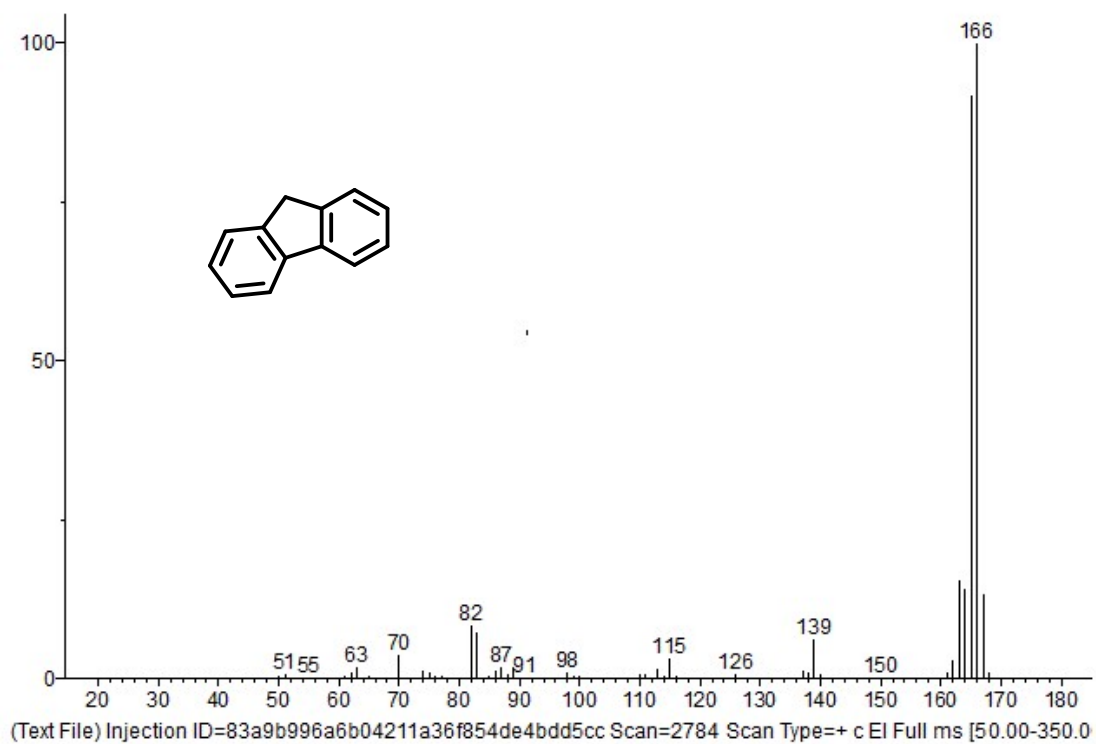

(a30)

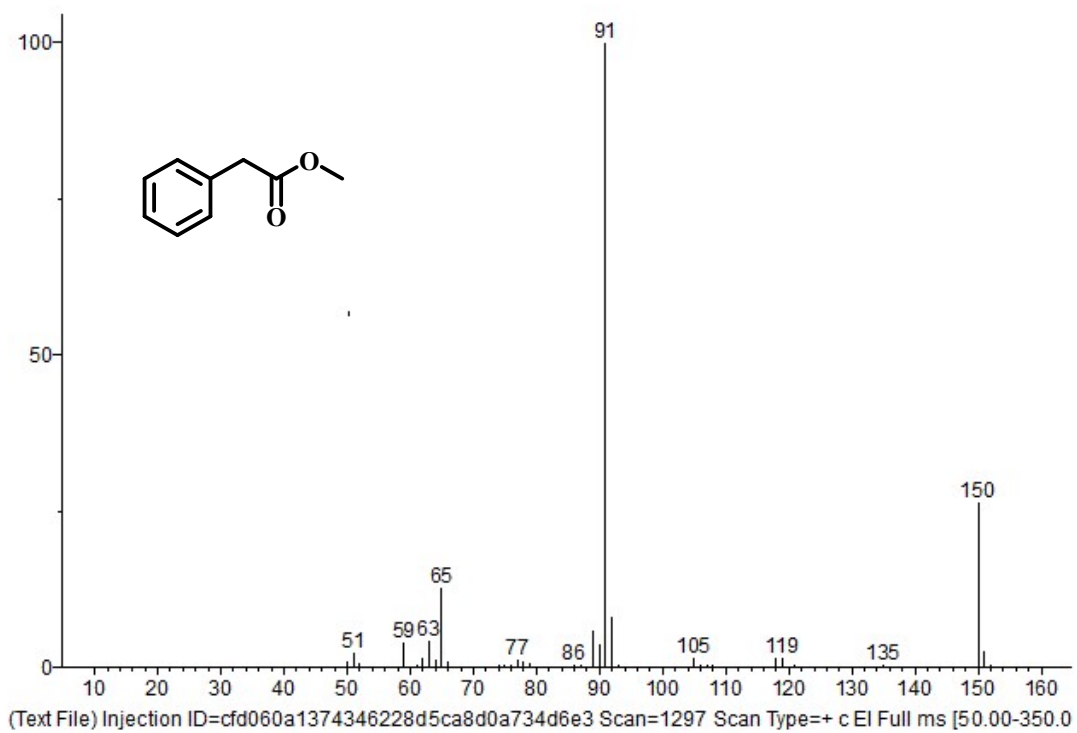

(a31)

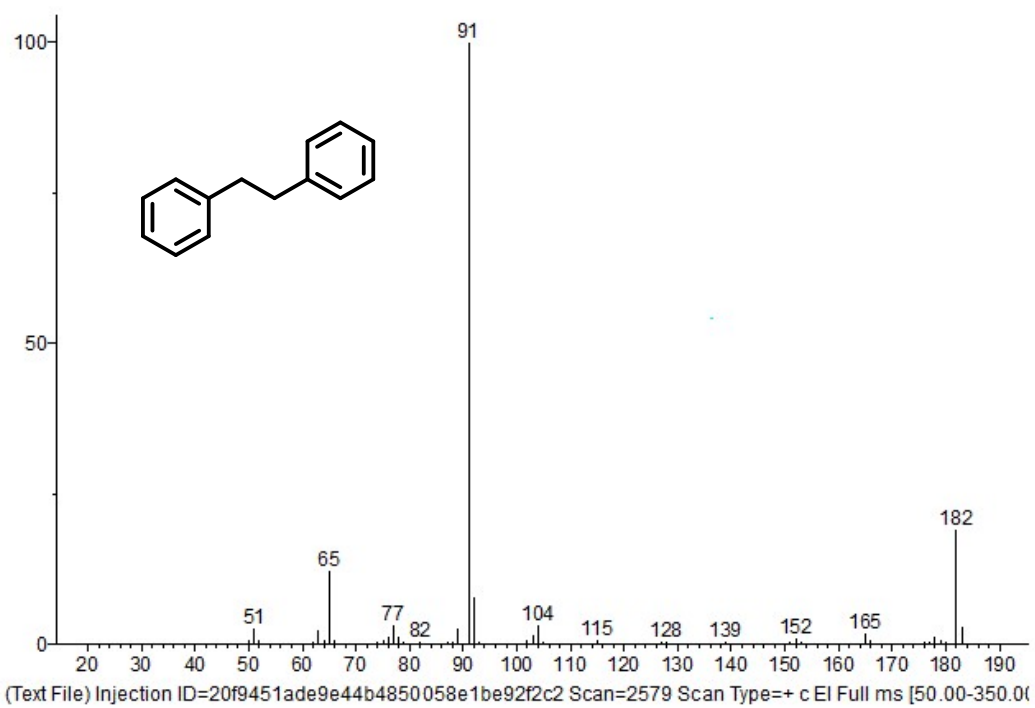

(a32)

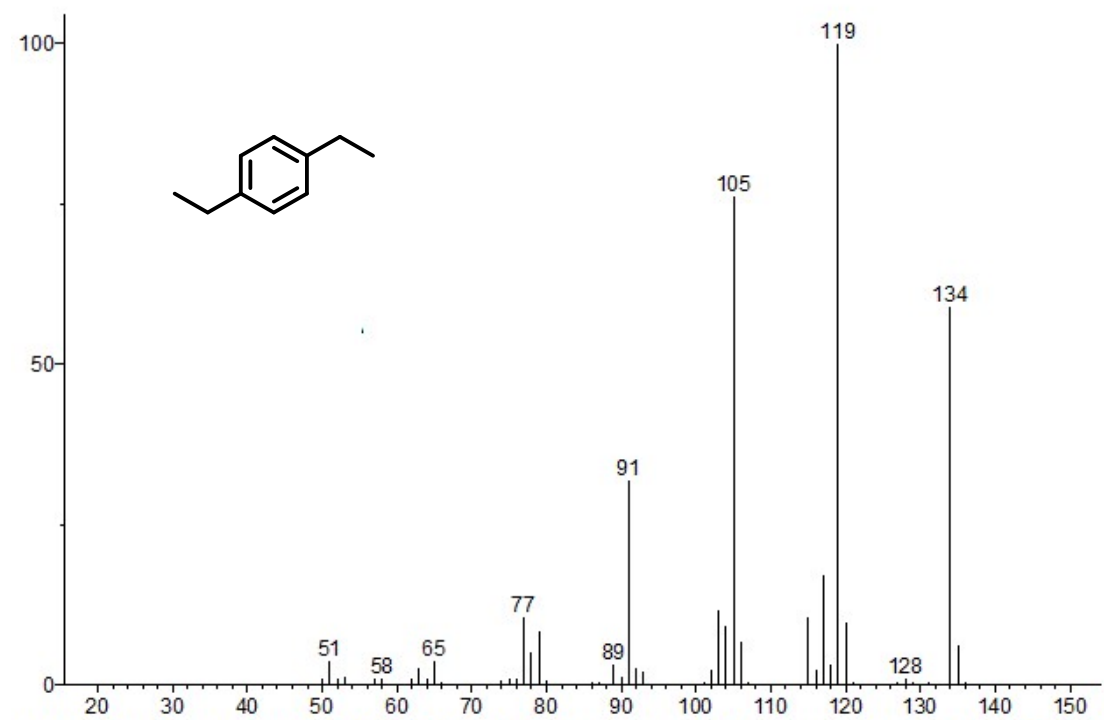

(Text File) Injection ID=d3f2e569db0842e5867f5534064e3d6b Scan=826 Scan Type=+ c EI Full ms [50.00-350.00]

(a33)

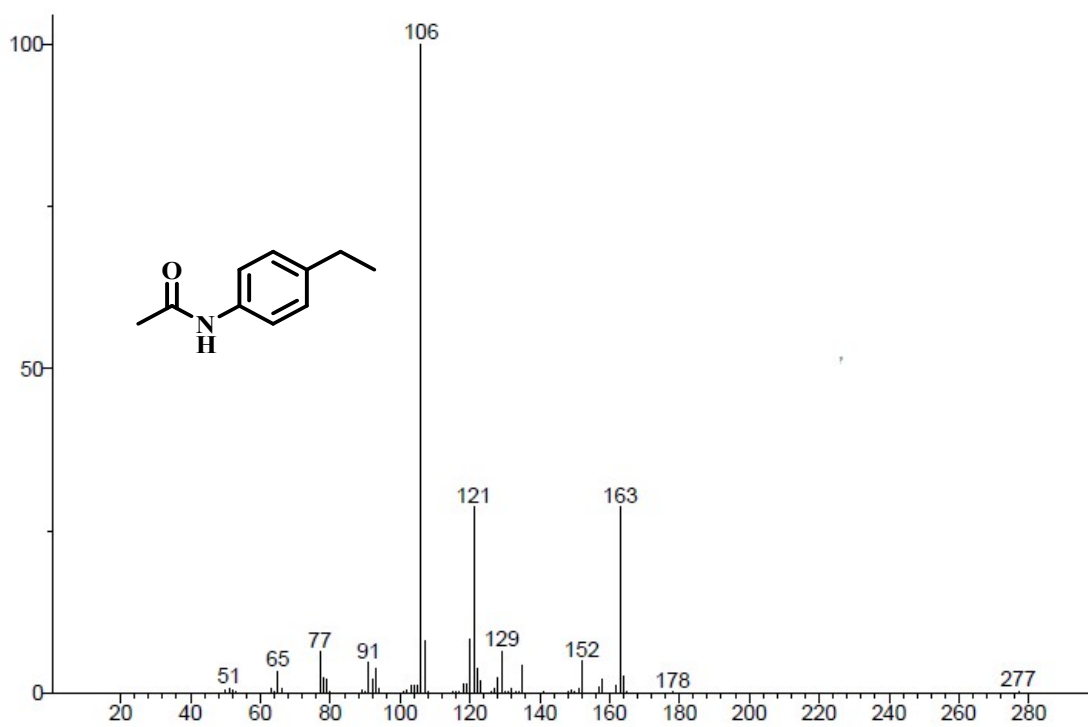

(Text File) Injection ID=1685fdcd434f4aaf9155c10cd1a7cd9e Scan=2926 Scan Type=+ c EI Full ms [50.00-350.00]

(a34)

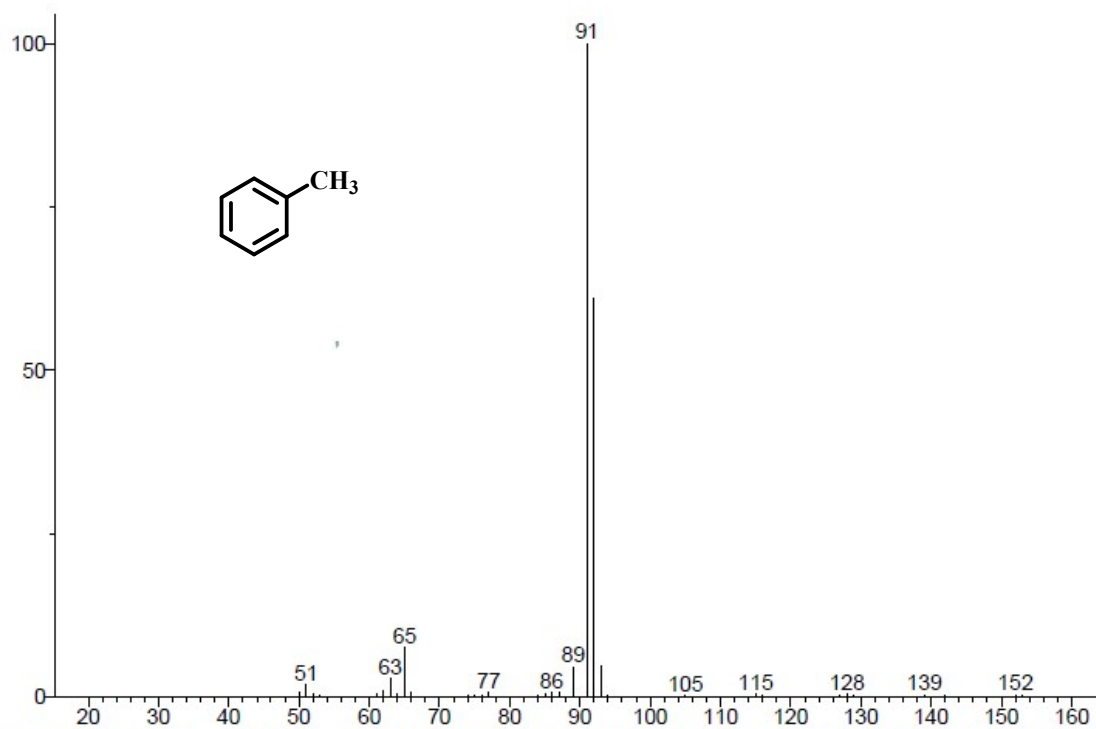

(Text File) Injection ID=9258c6bd6e394e9b90a42bda61273230 Scan=174 Scan Type=+ c EI Full ms [50.00-350.00]



(a35)

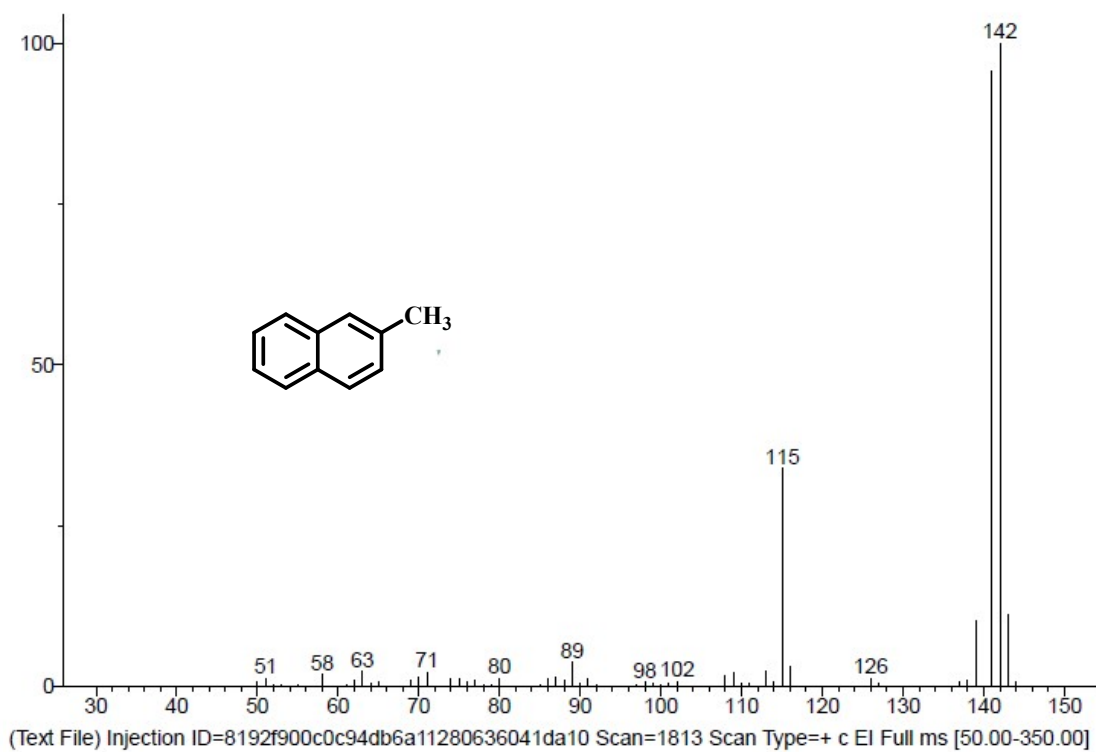

(a36)

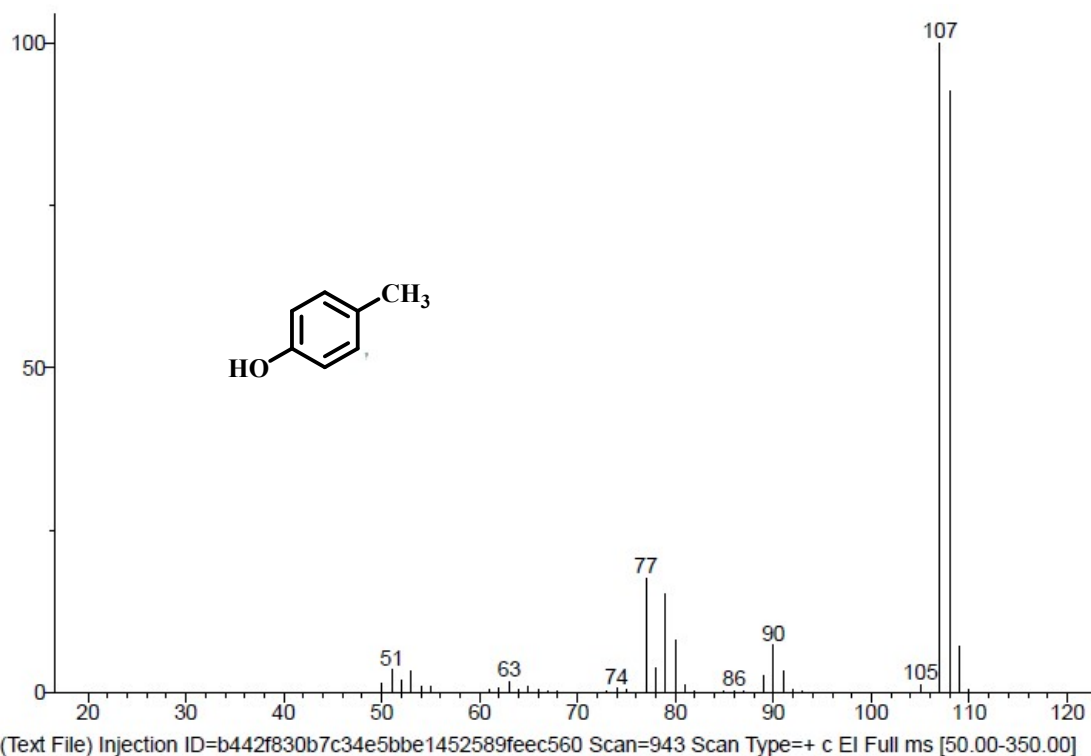

(a37)

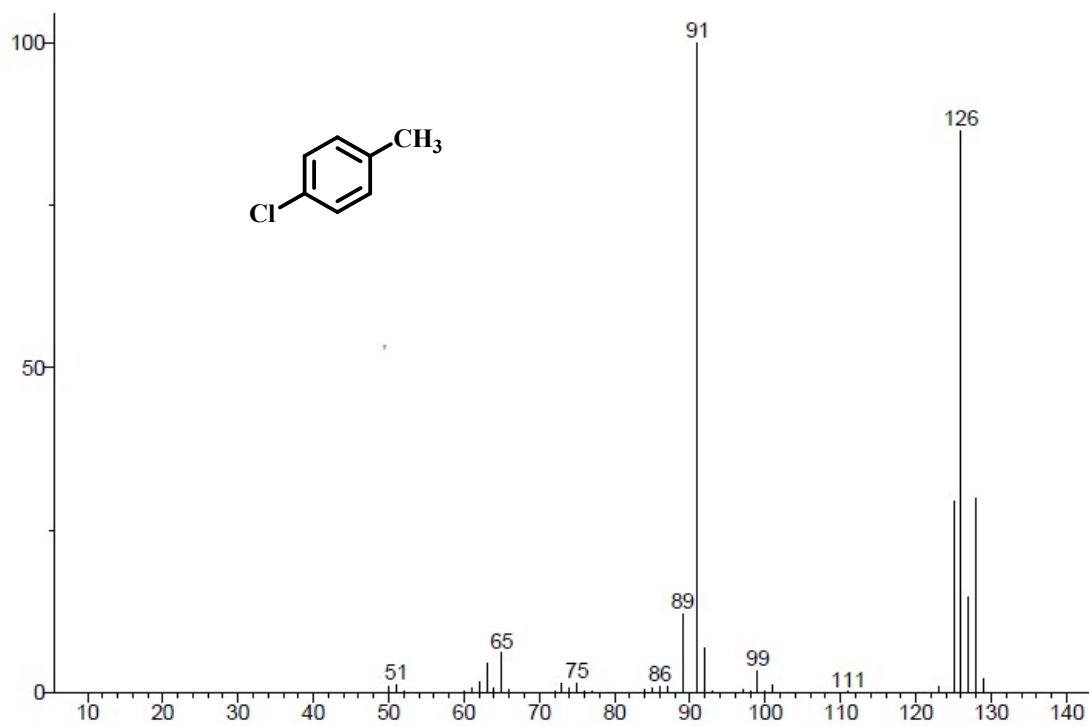

(Text File) Injection ID=9258c6bd6e394e9b90a42bda61273230 Scan=549 Scan Type=+ c EI Full ms [50.00-350.00]

(a38)

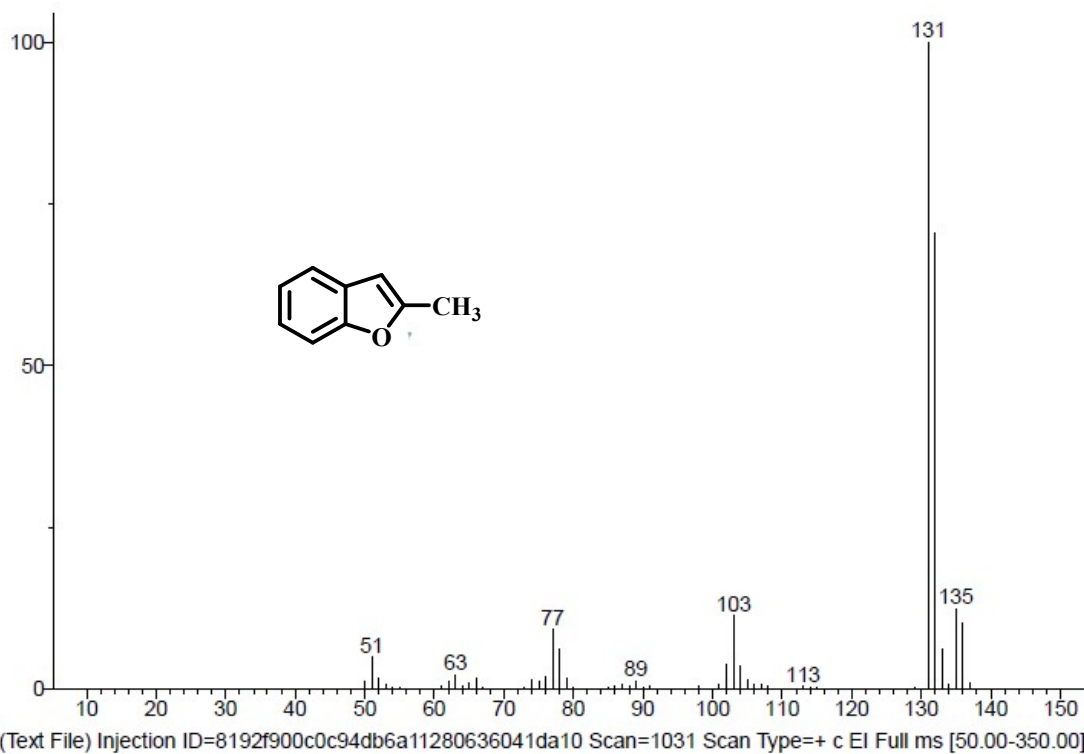

(a39)

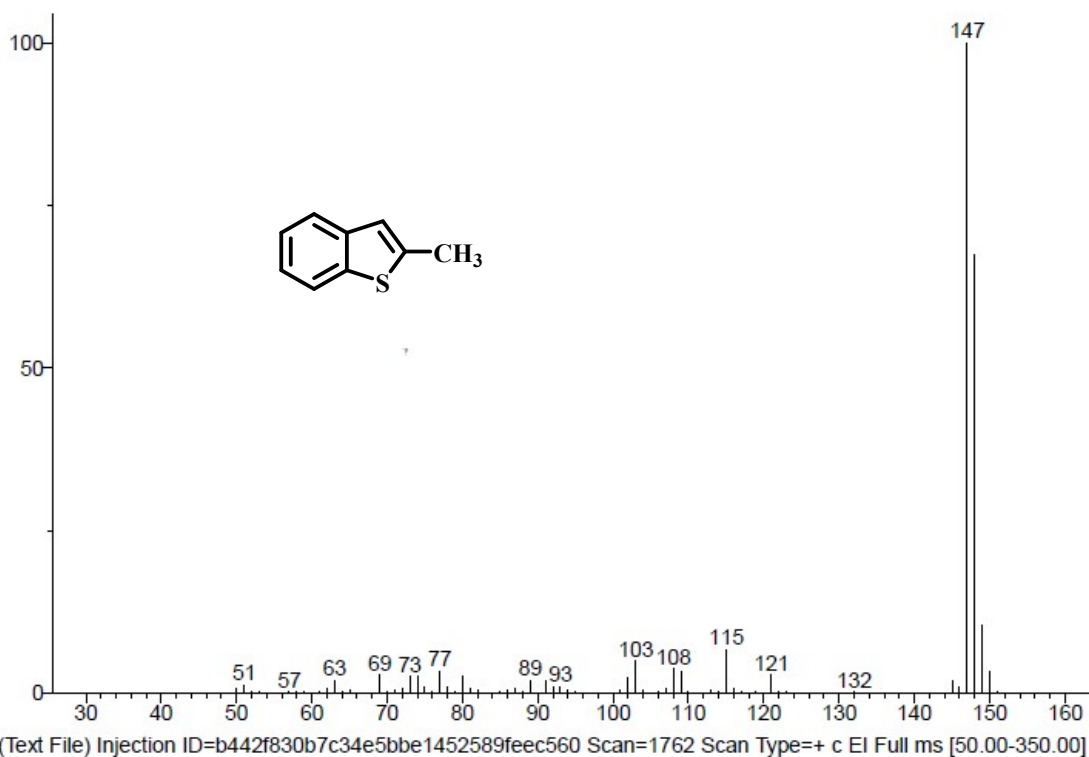

(a40)

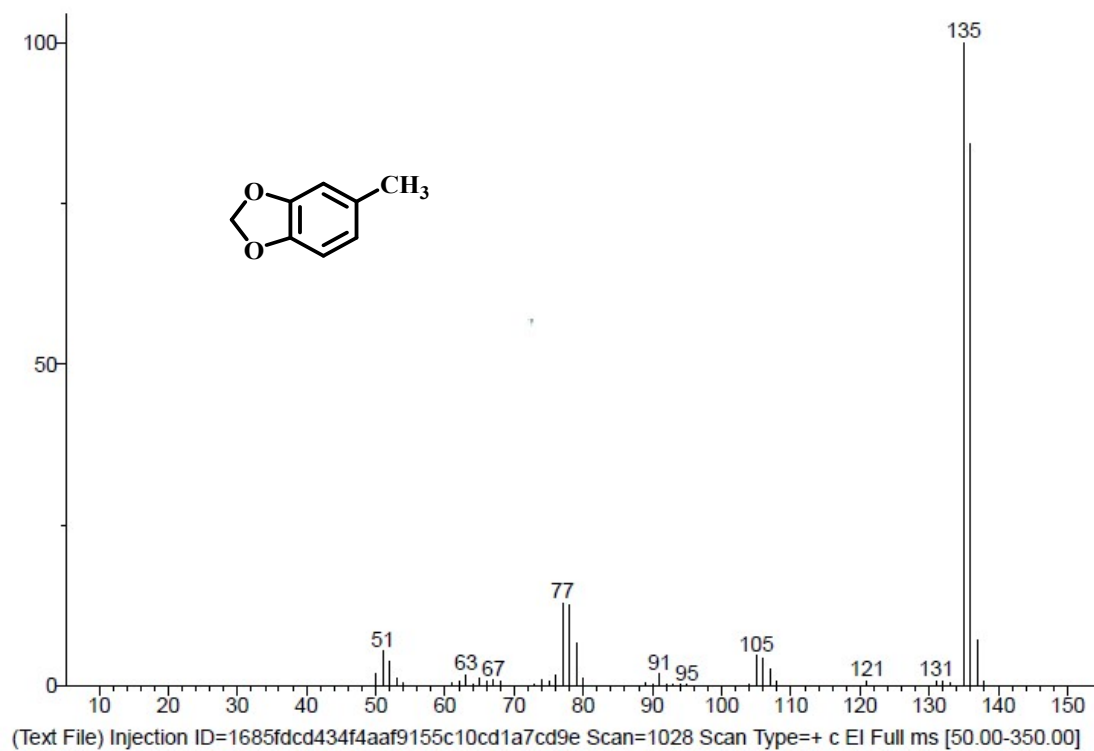

(a41)

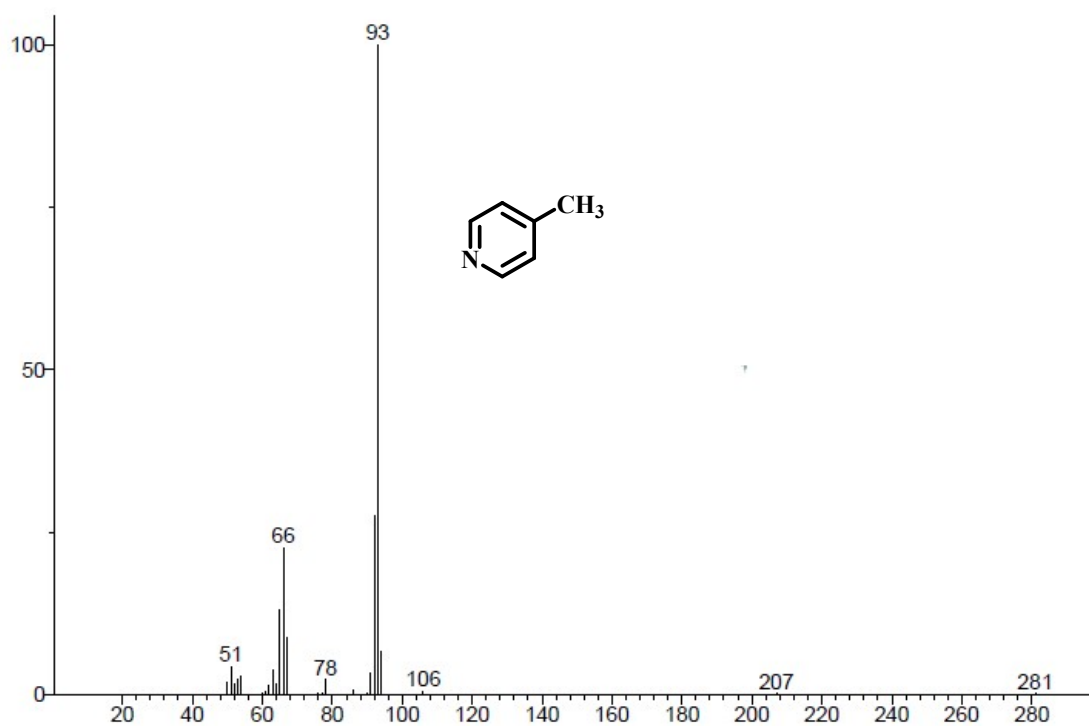

(Text File) Injection ID=8192f900c0c94db6a11280636041da10 Scan=257 Scan Type=+ c EI Full ms [50.00-350.00]

(a42)

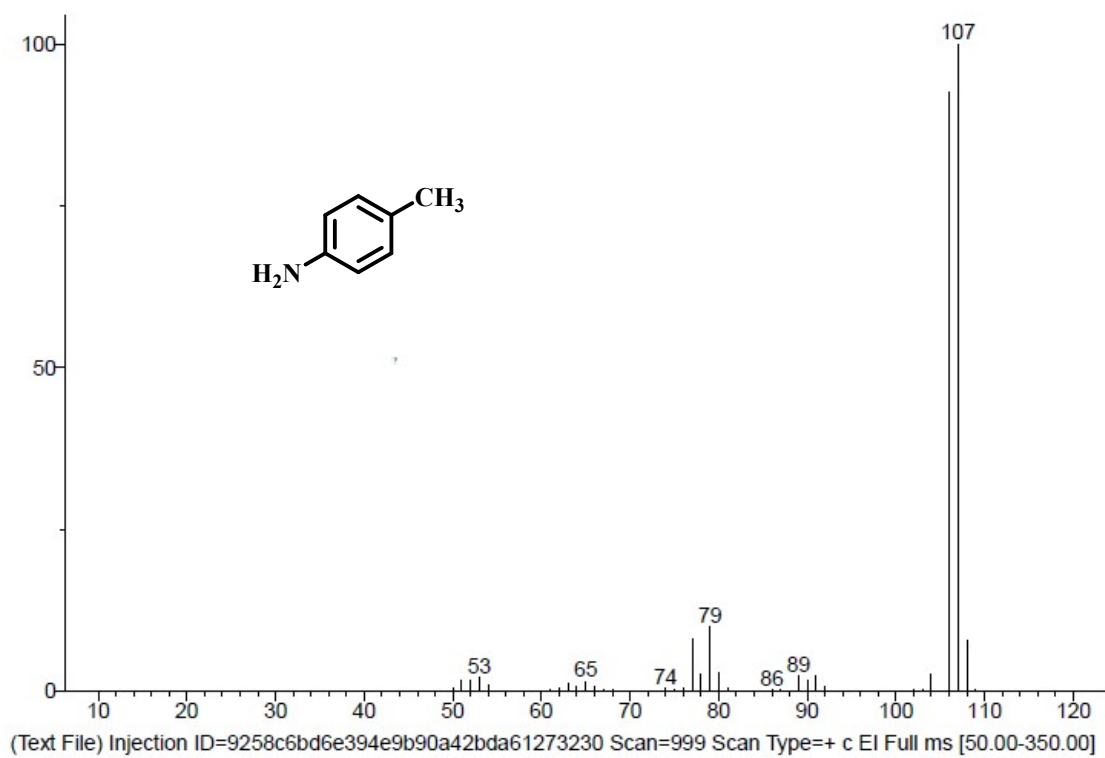



(a43)

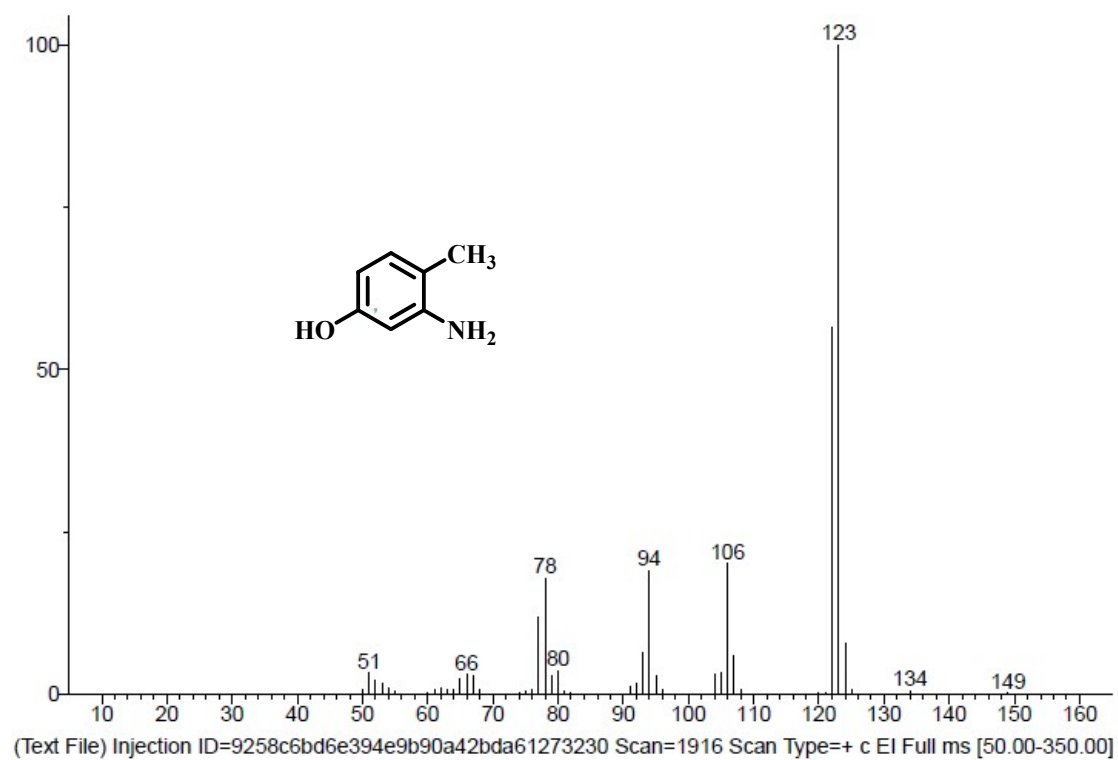

(a44)

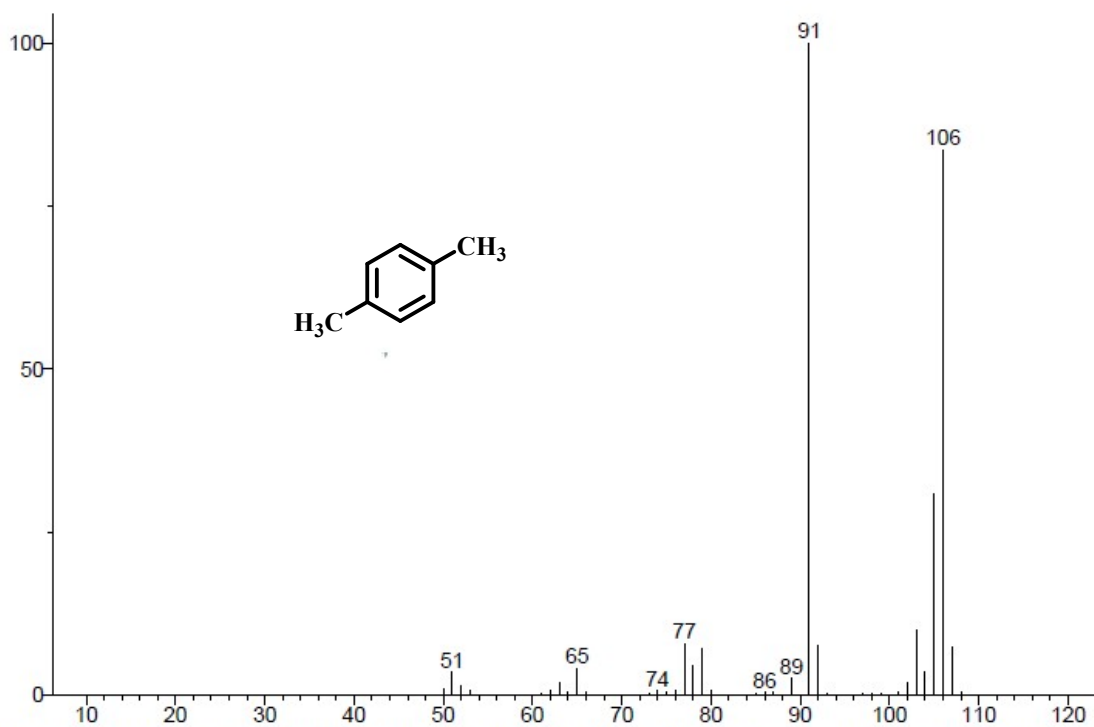

(Text File) Injection ID=9ee1d1b5f1bc4b2da3a3bee7bd768035 Scan=352 Scan Type=+ c EI Full ms [50.00-350.00]

(a45)

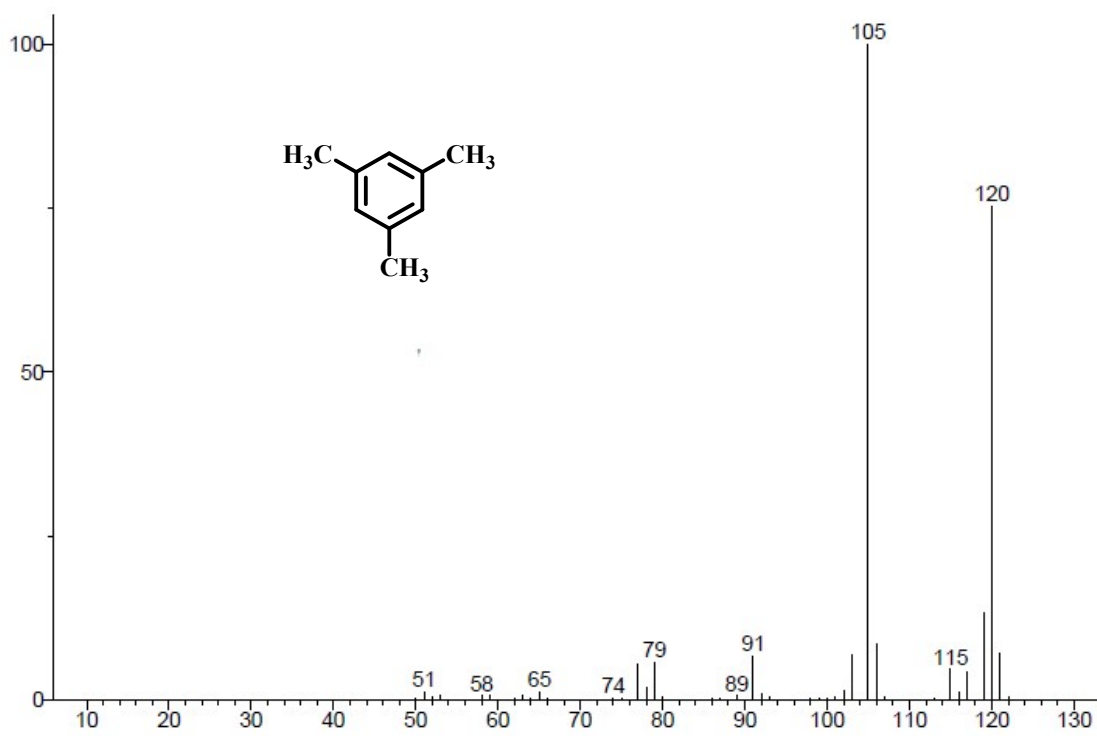

(Text File) Injection ID=9ee1d1b5f1bc4b2da3a3bee7bd768035 Scan=579 Scan Type=+ c EI Full ms [50.00-350.00]

(b1)

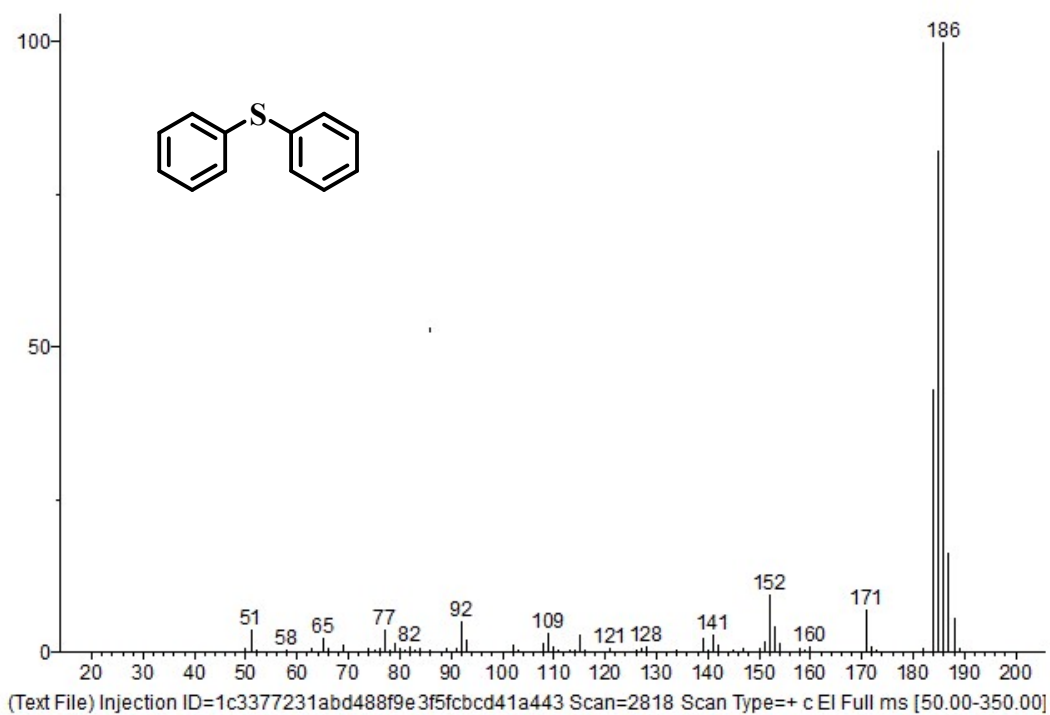

(b2)

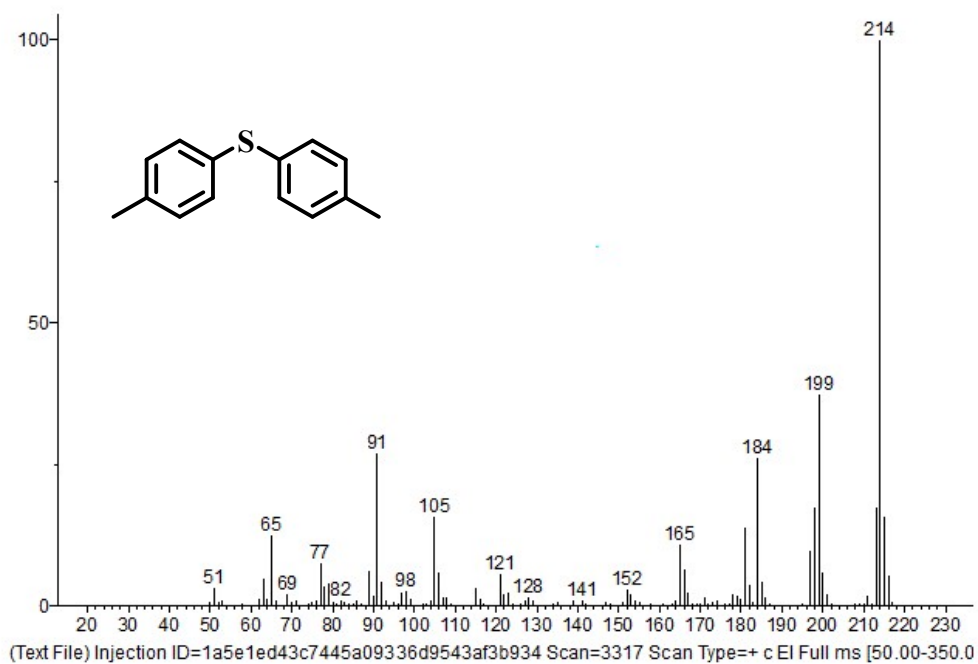

(b3)

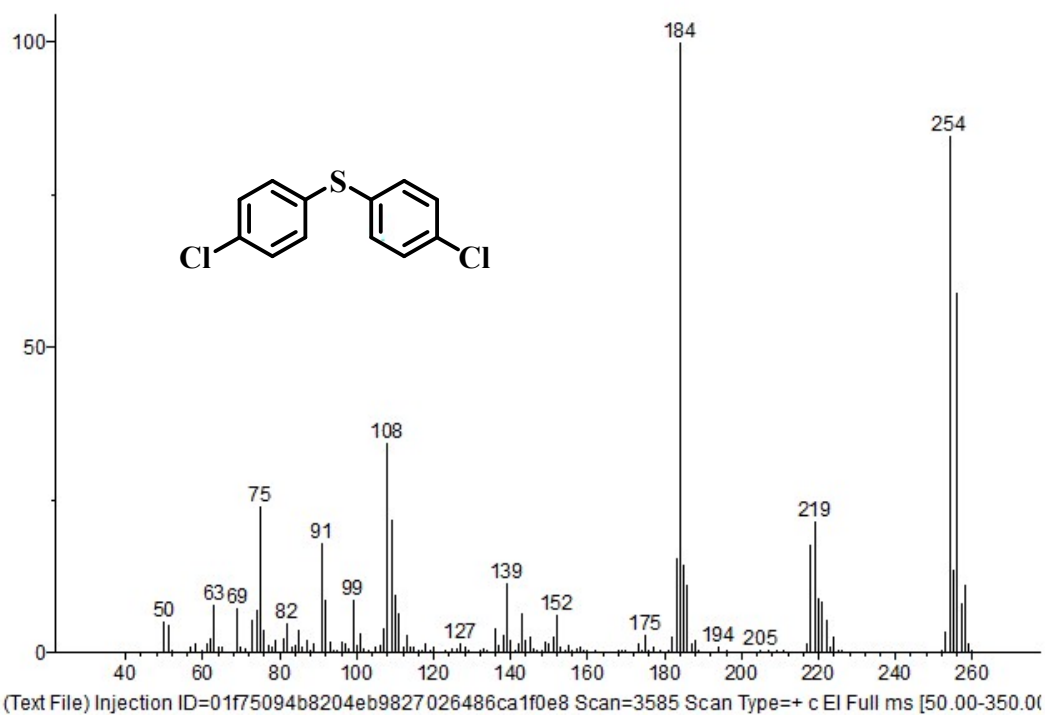

(b4)

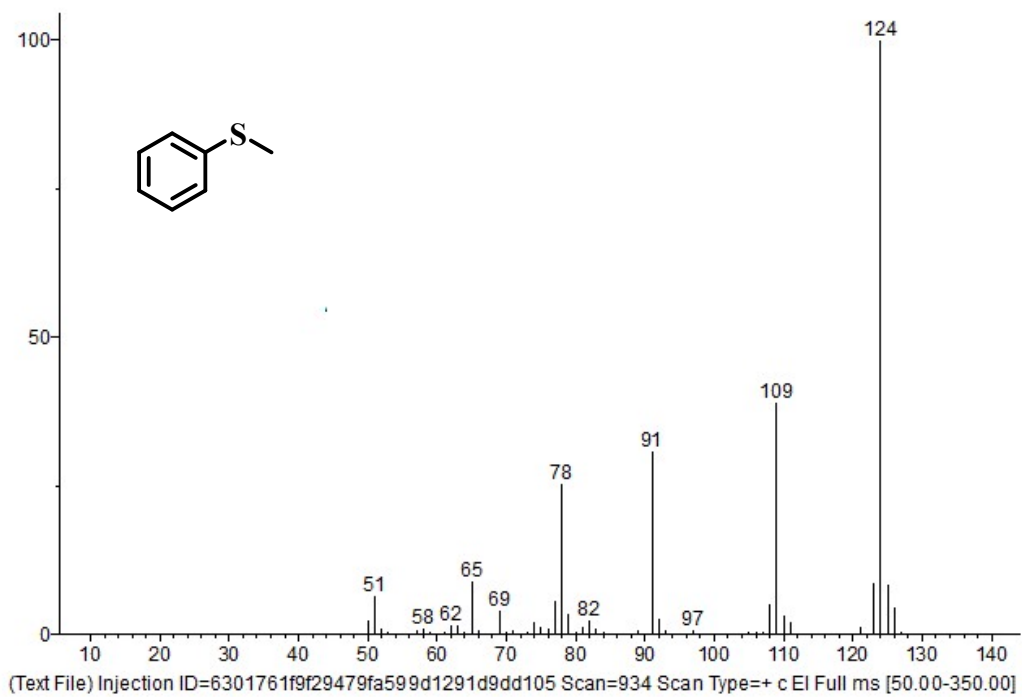

(b5)

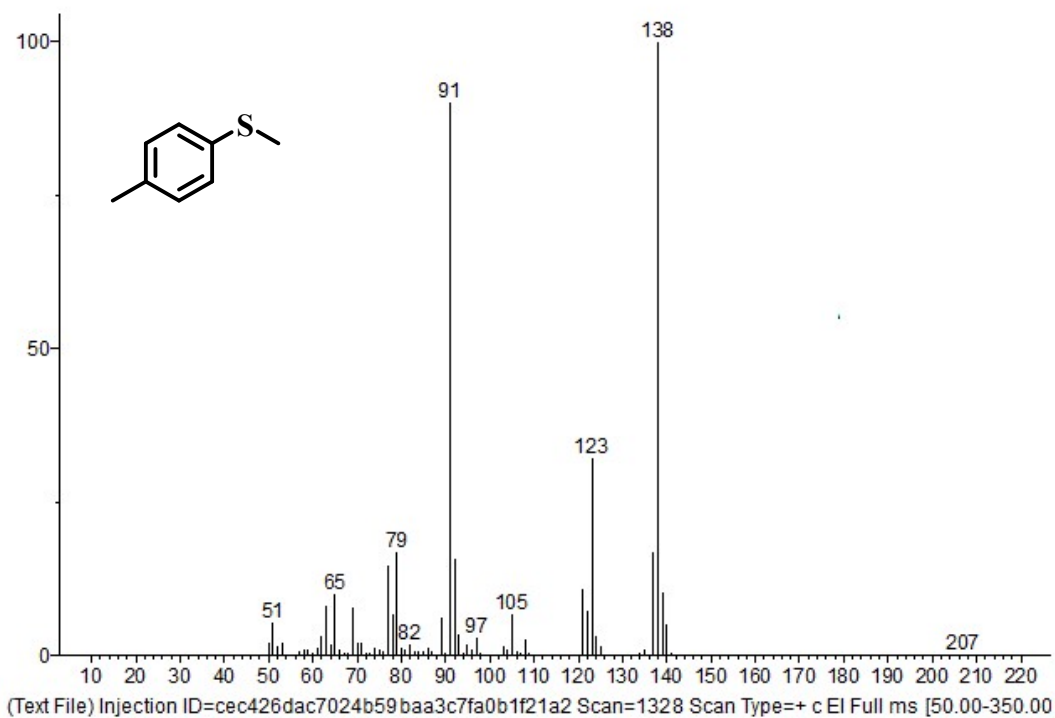



(b6)

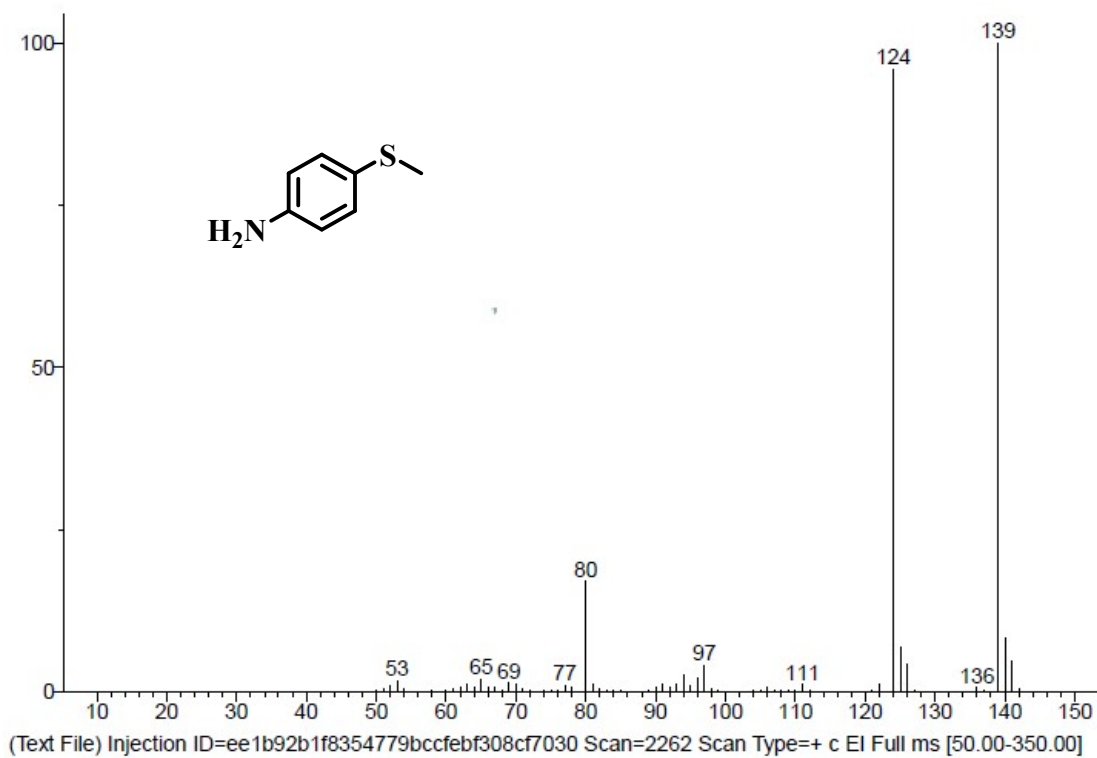

(b7)

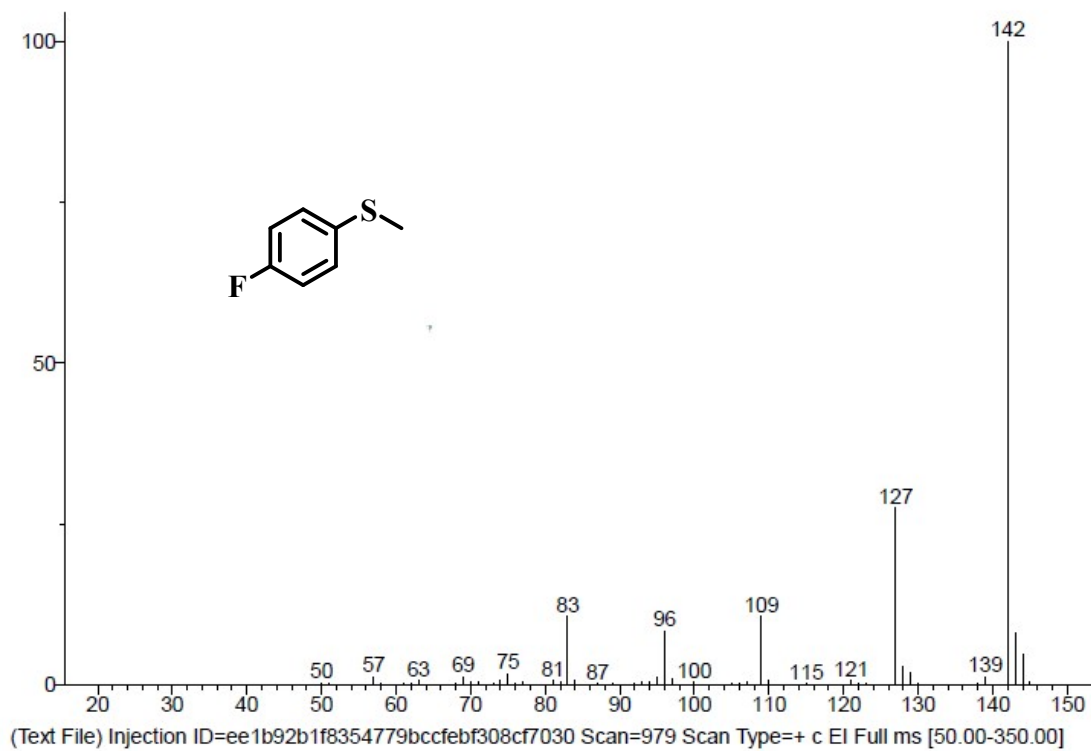

(b8)

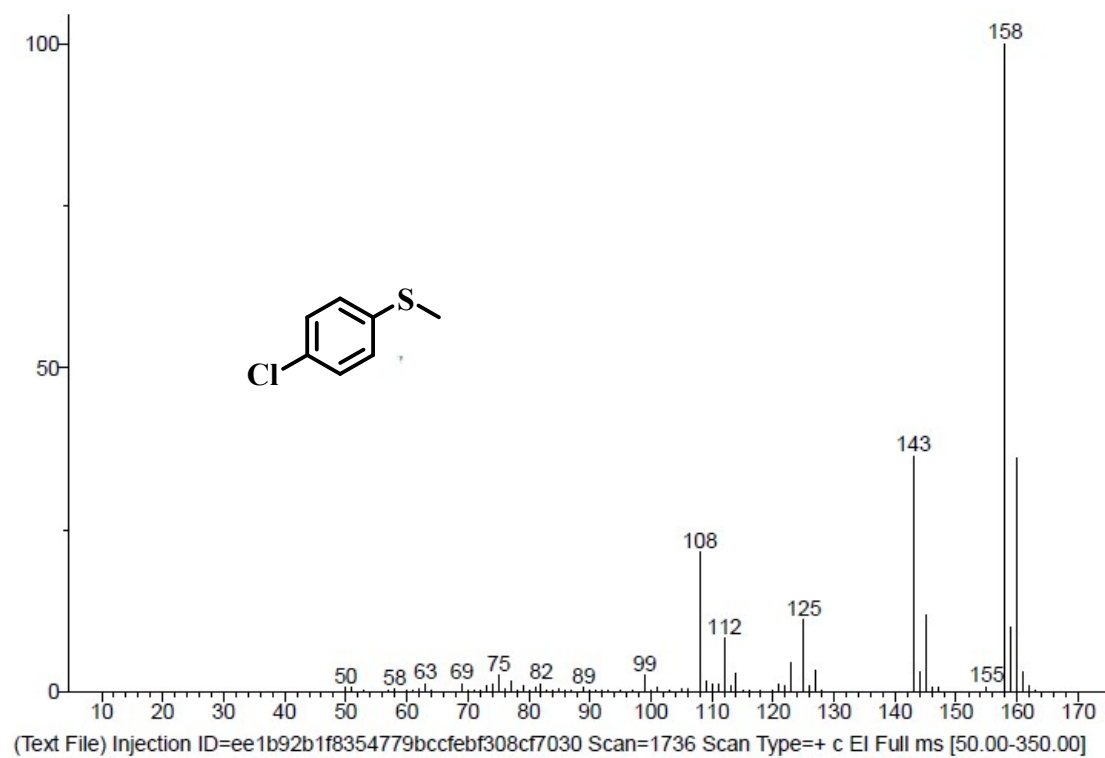

(b9)

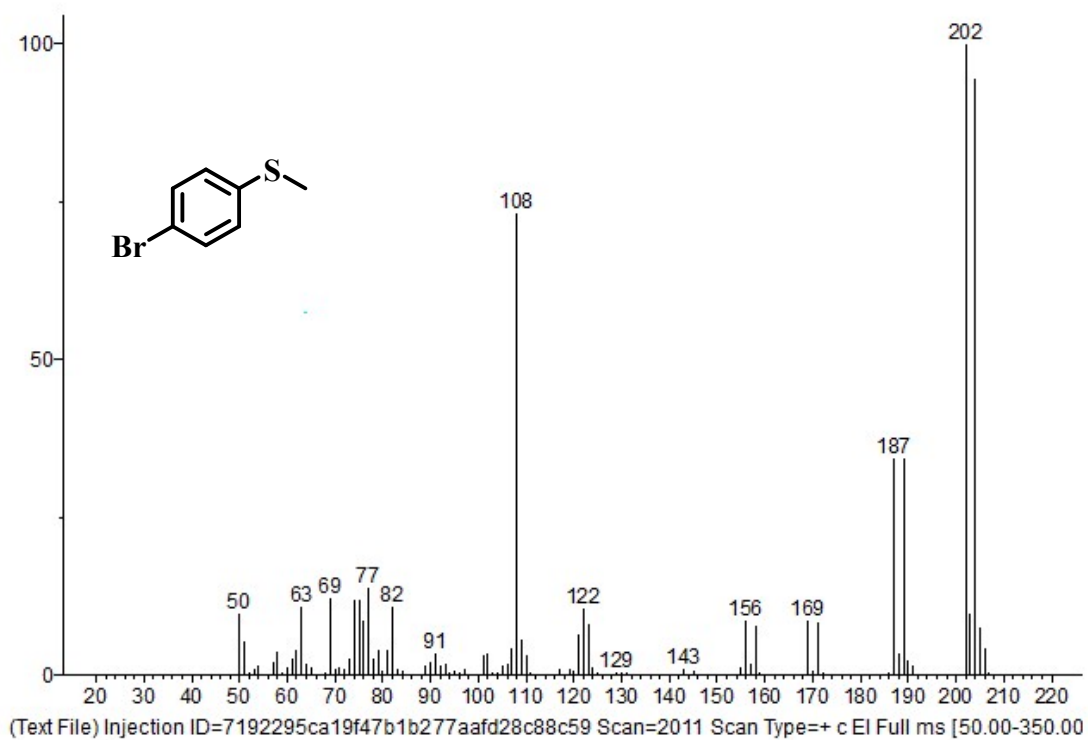

(b10)

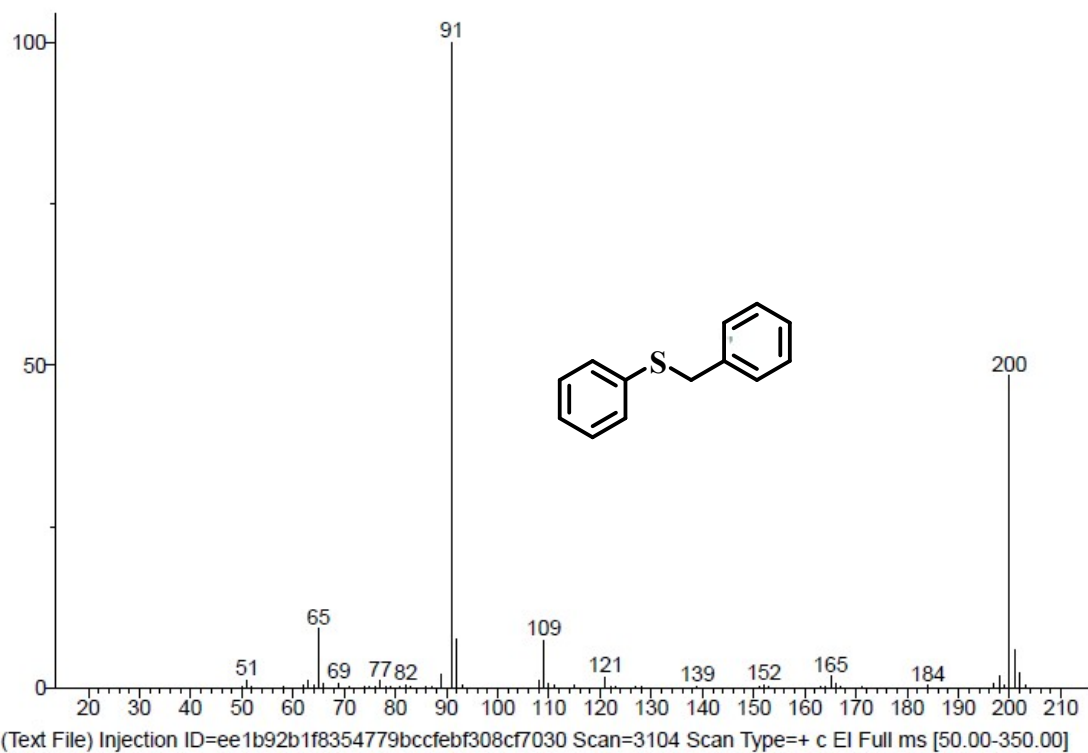

(b12)

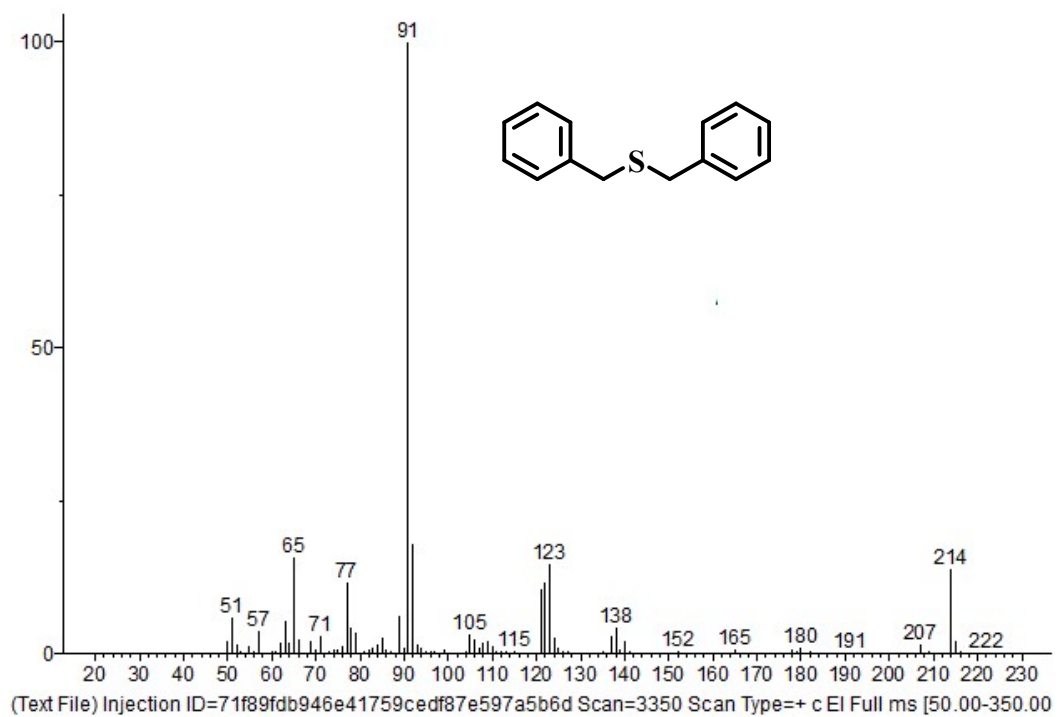

(b13)

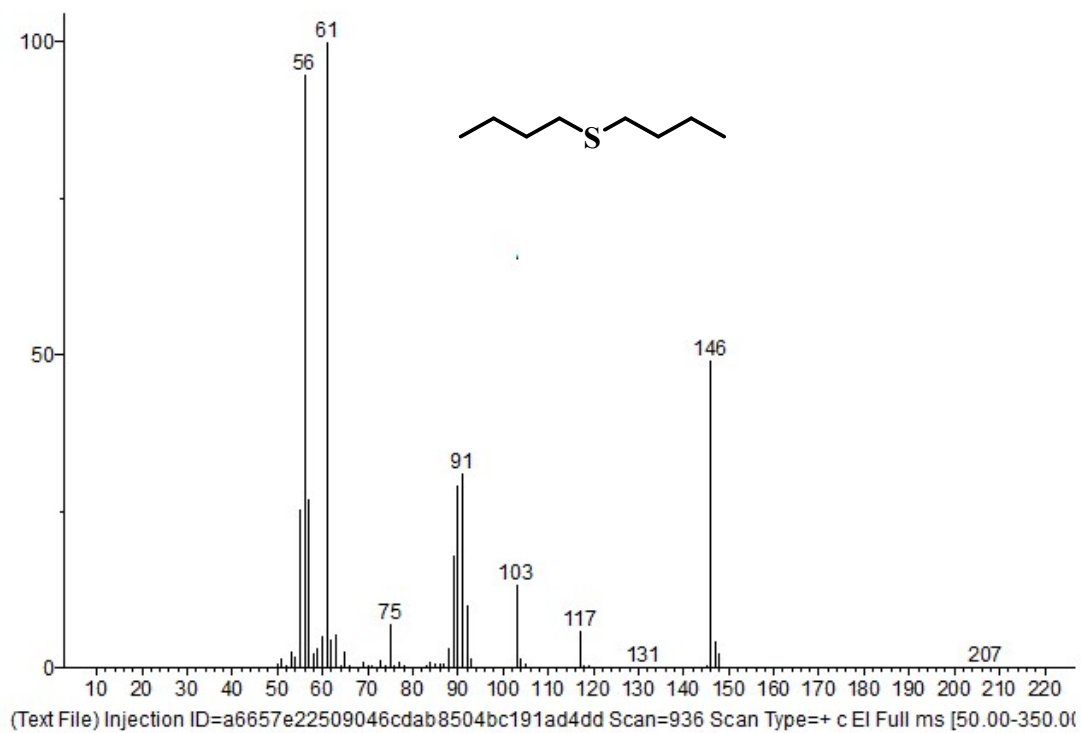

(b14)

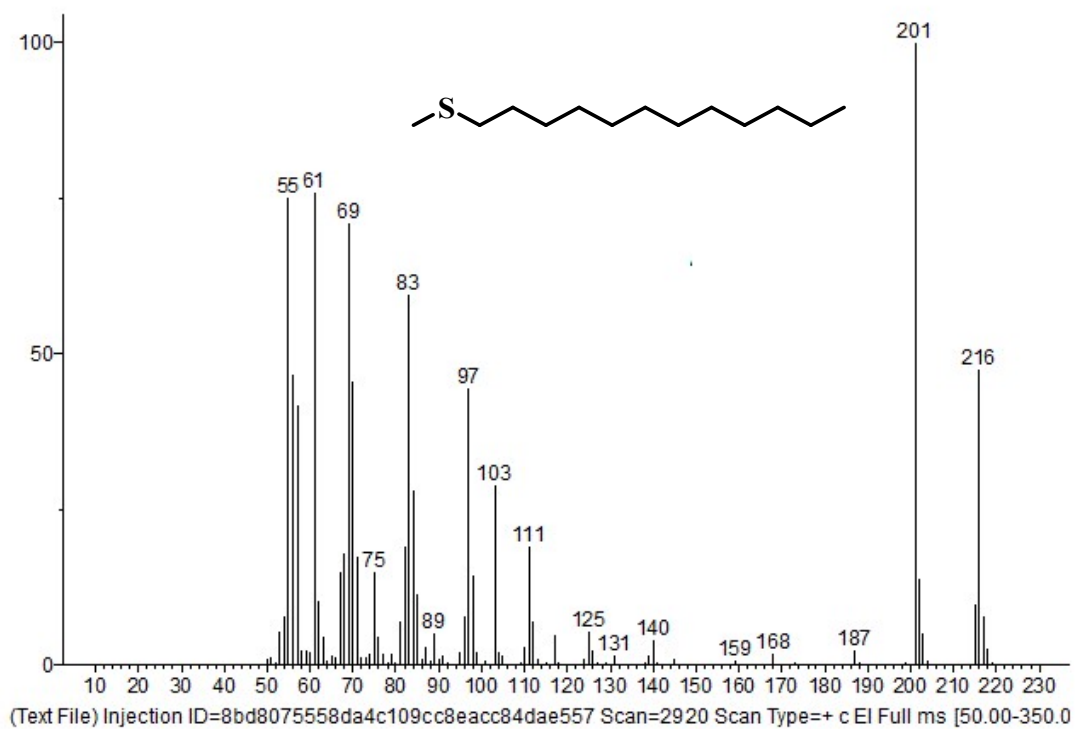



(c1)

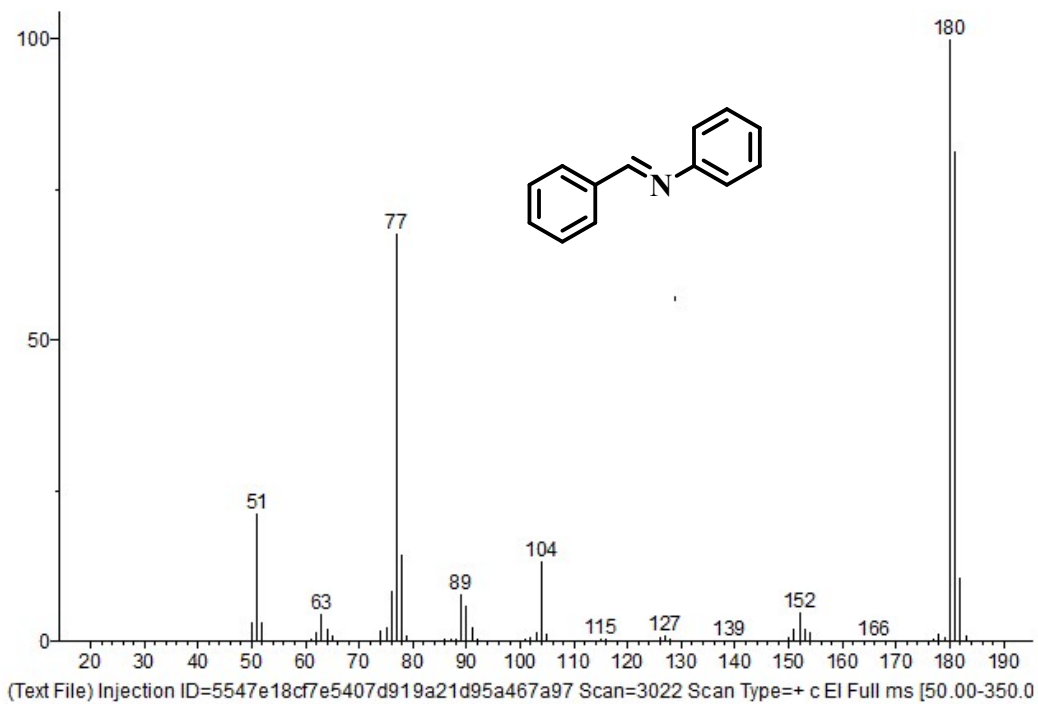

(c2)

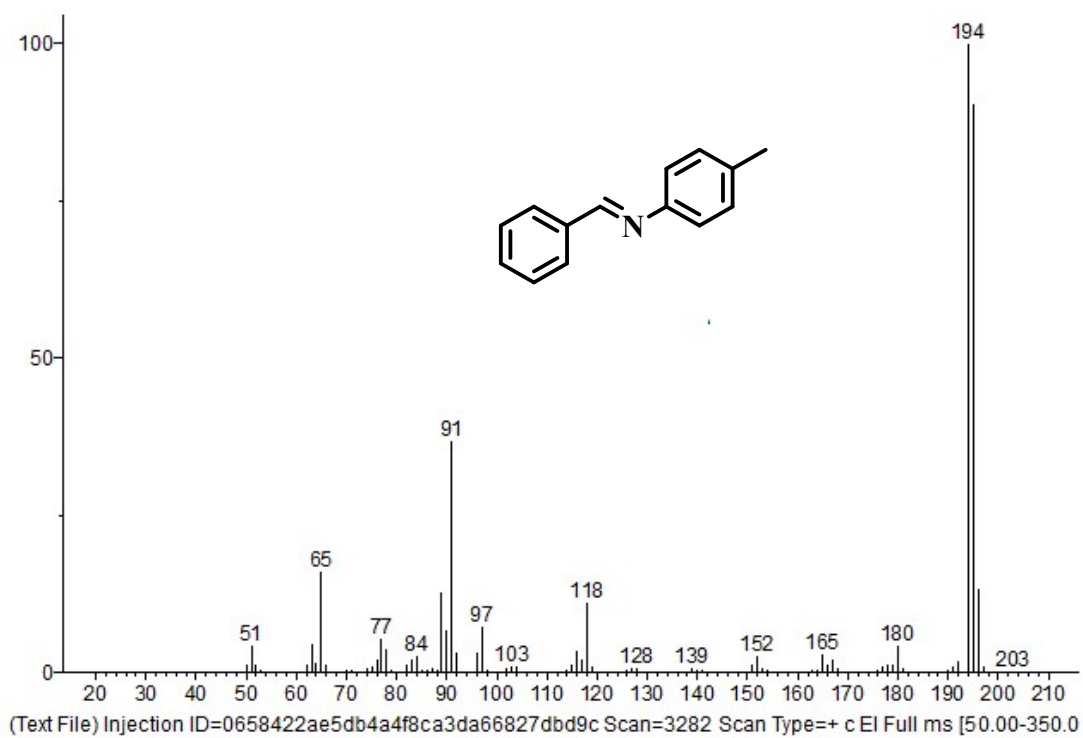

(c3)

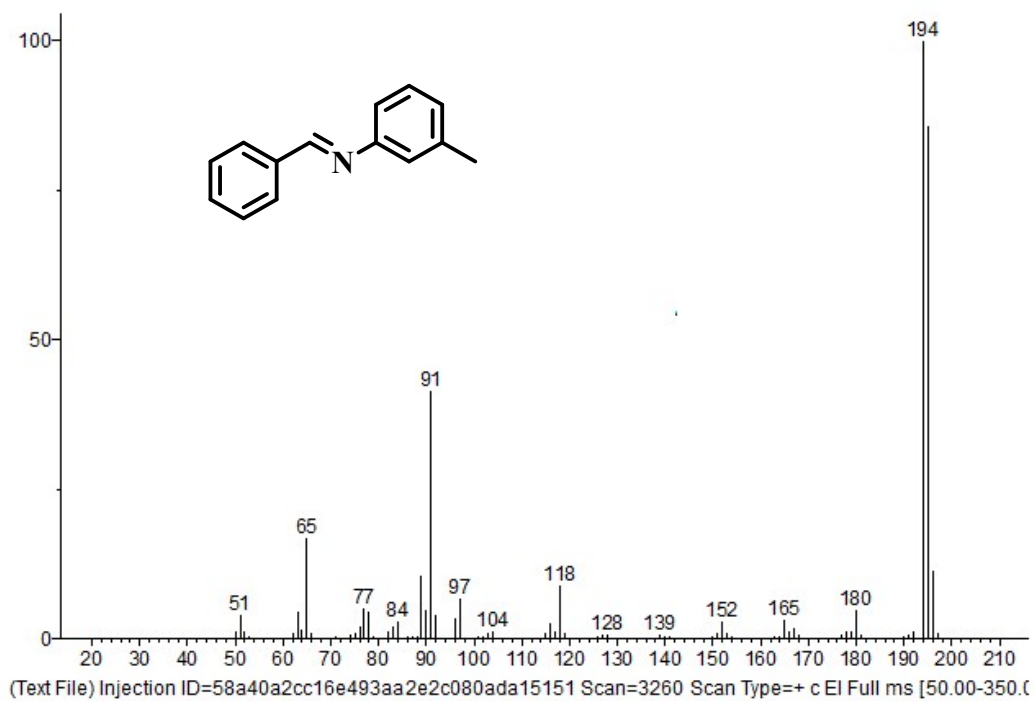

(c4)

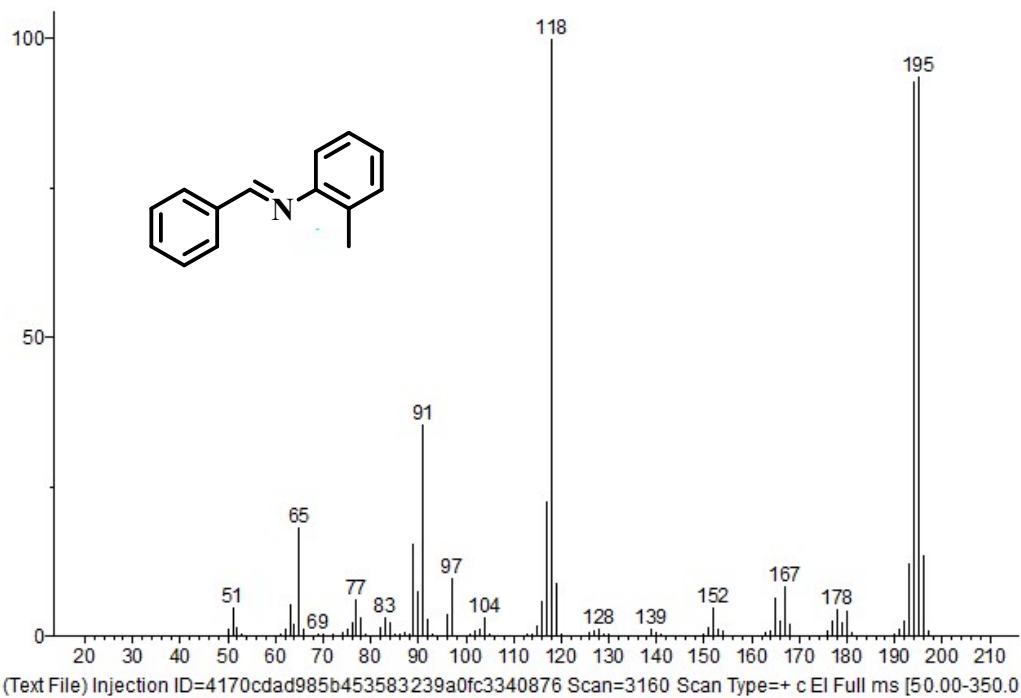

(c5)

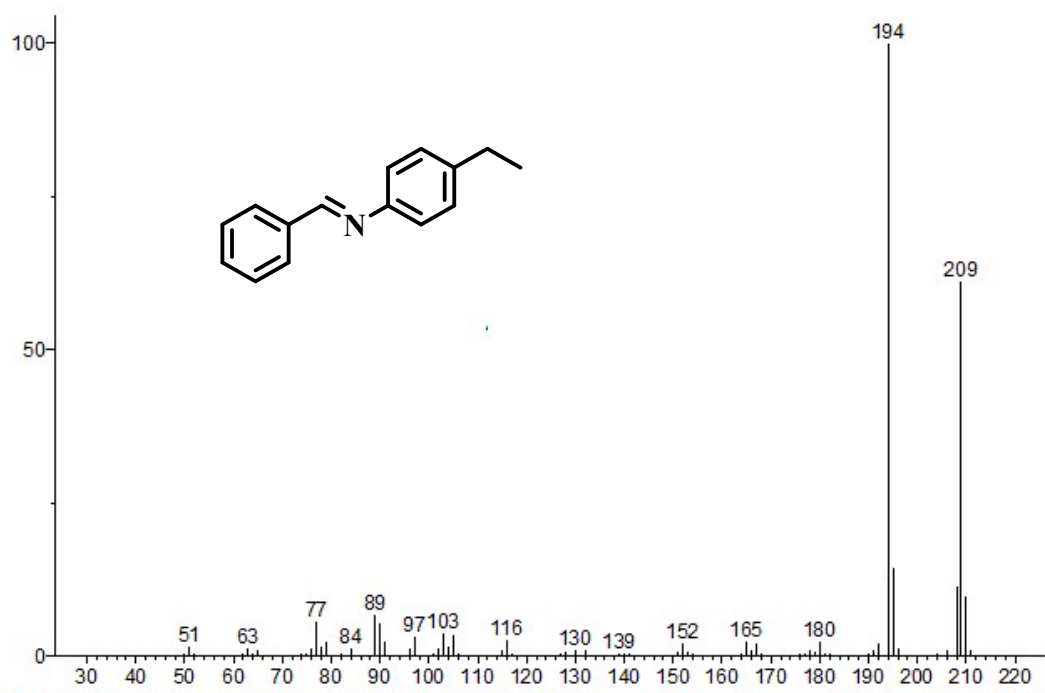

(Text File) Injection ID=376c7b00ed724378af7ad278c67d7493 Scan=3473 Scan Type=+ c EI Full ms [50.00-350.0

(b6)

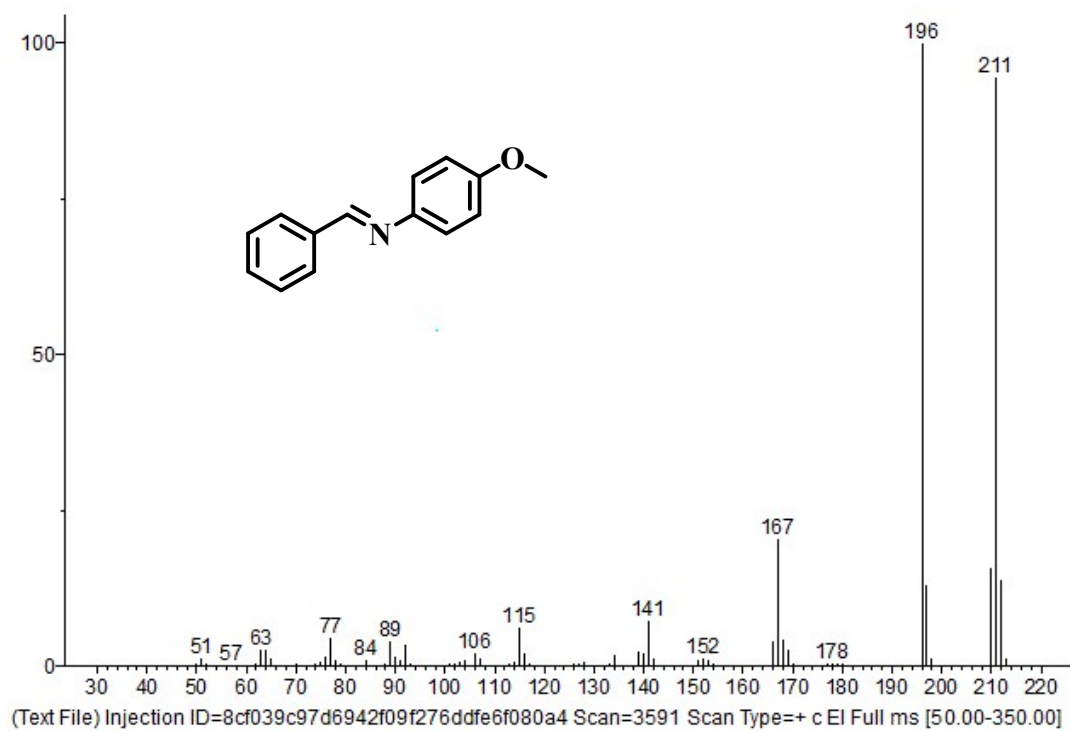

(b7)

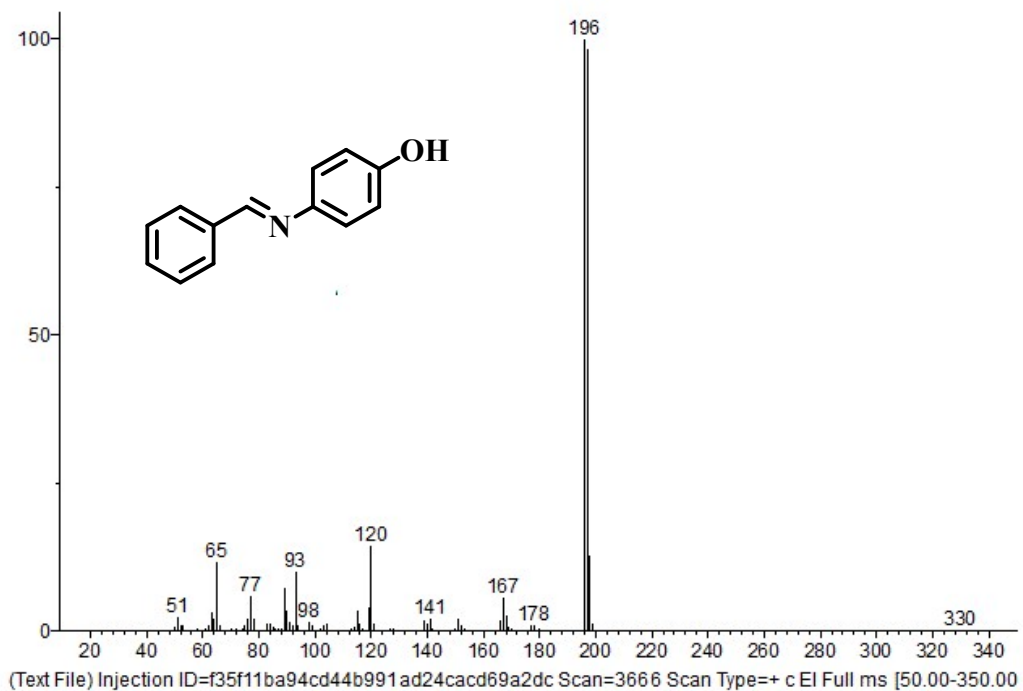

(b8)

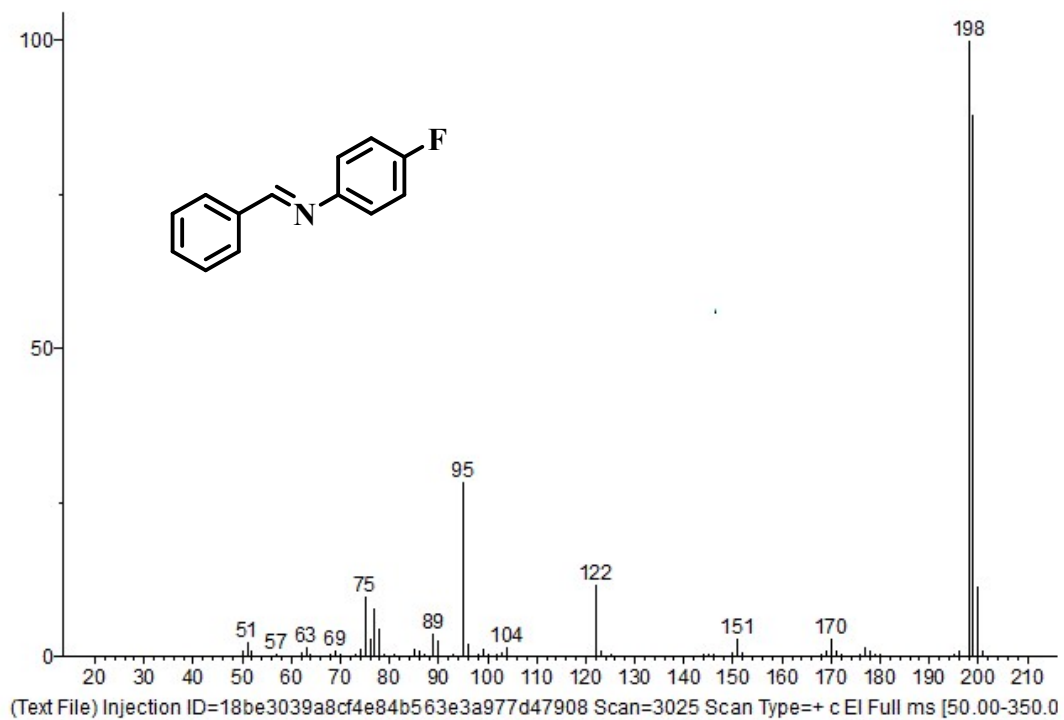



(c9)

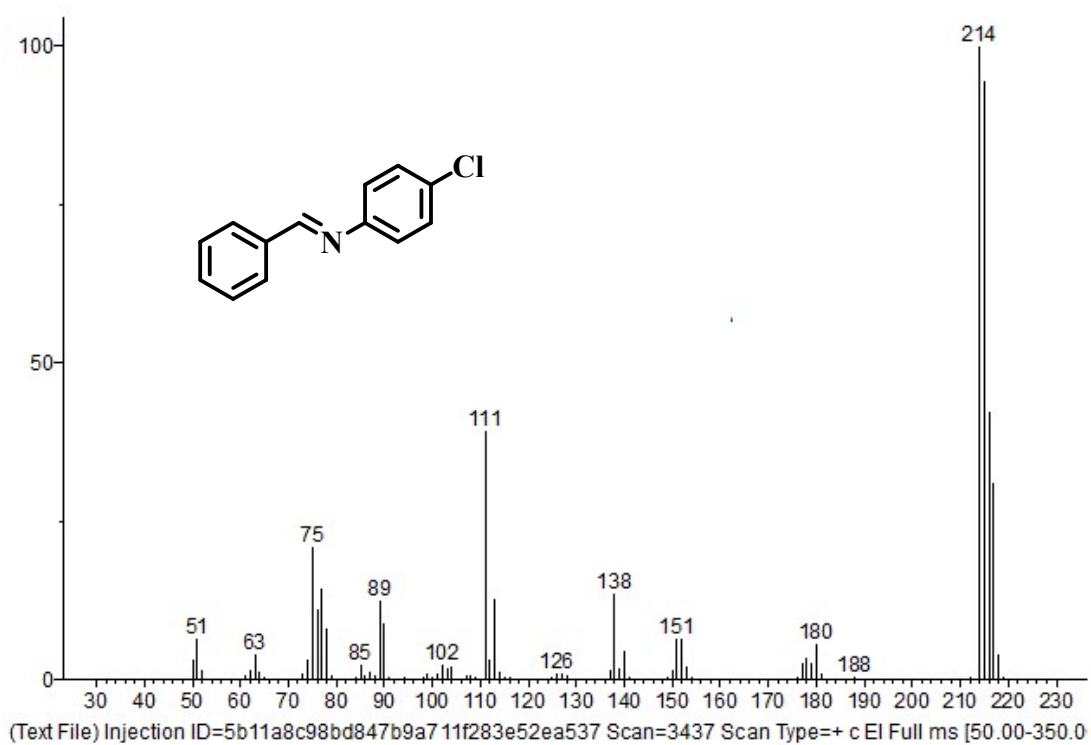

(c10)

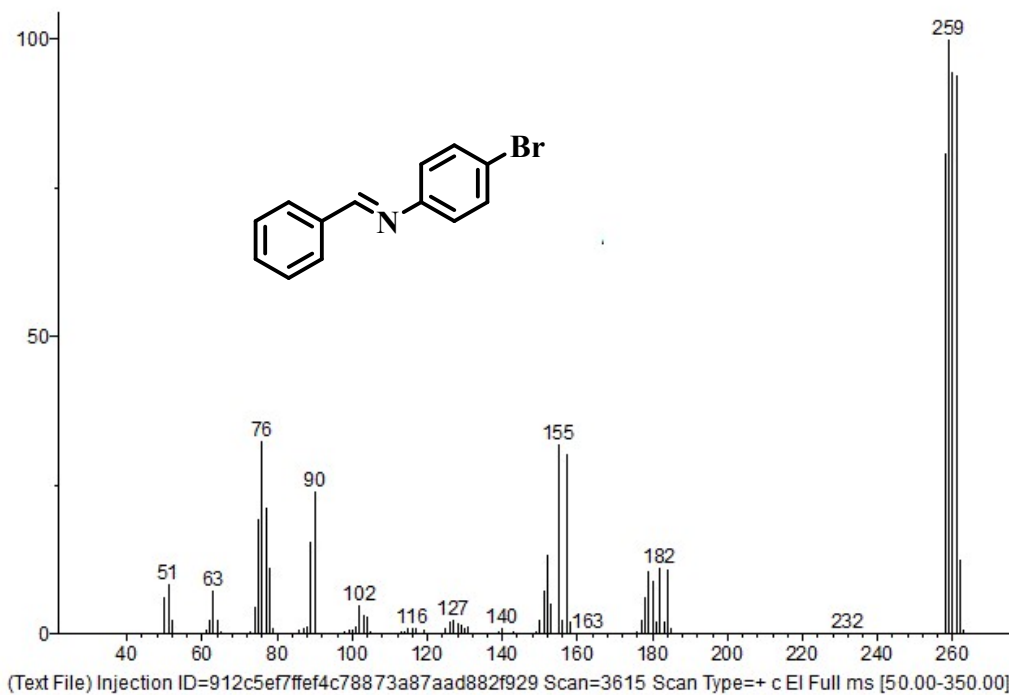

(c11)

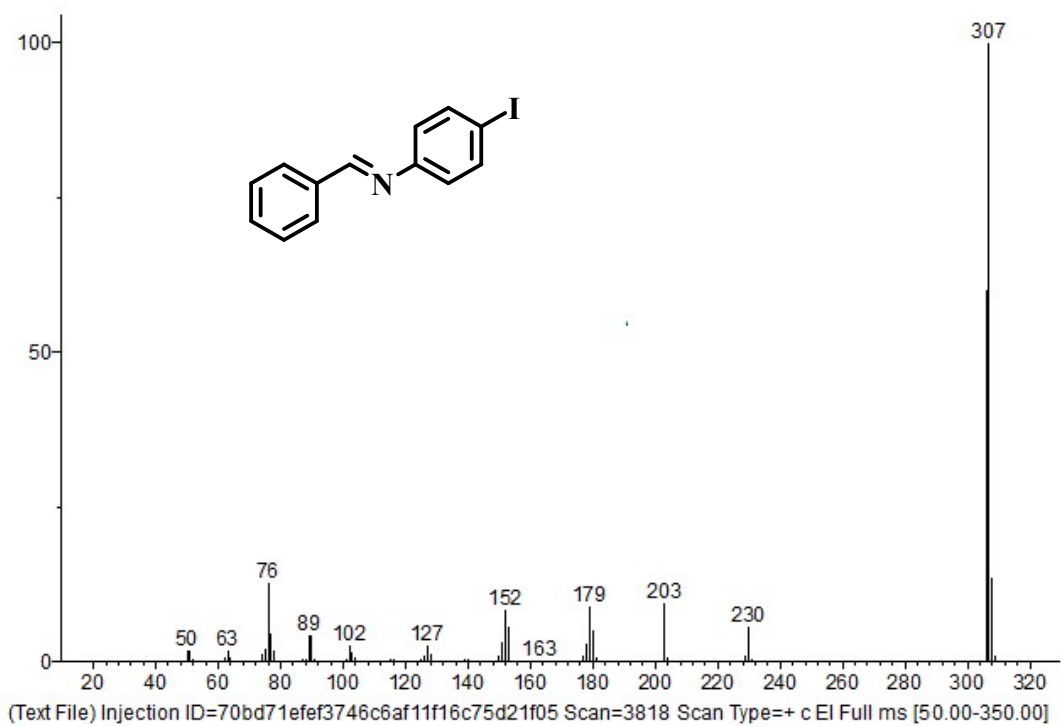

(c12)

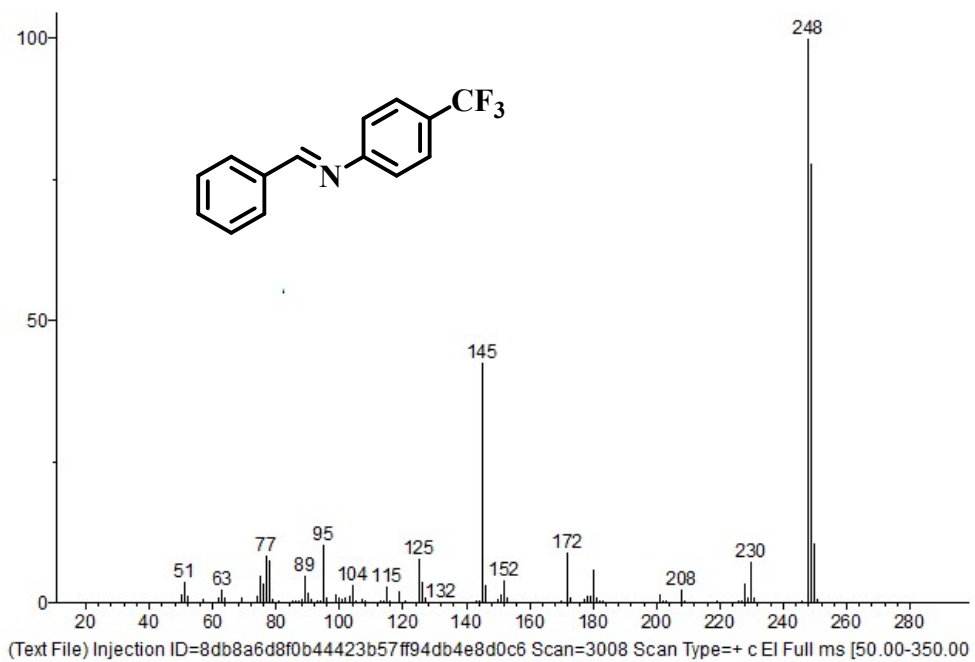

(c13)

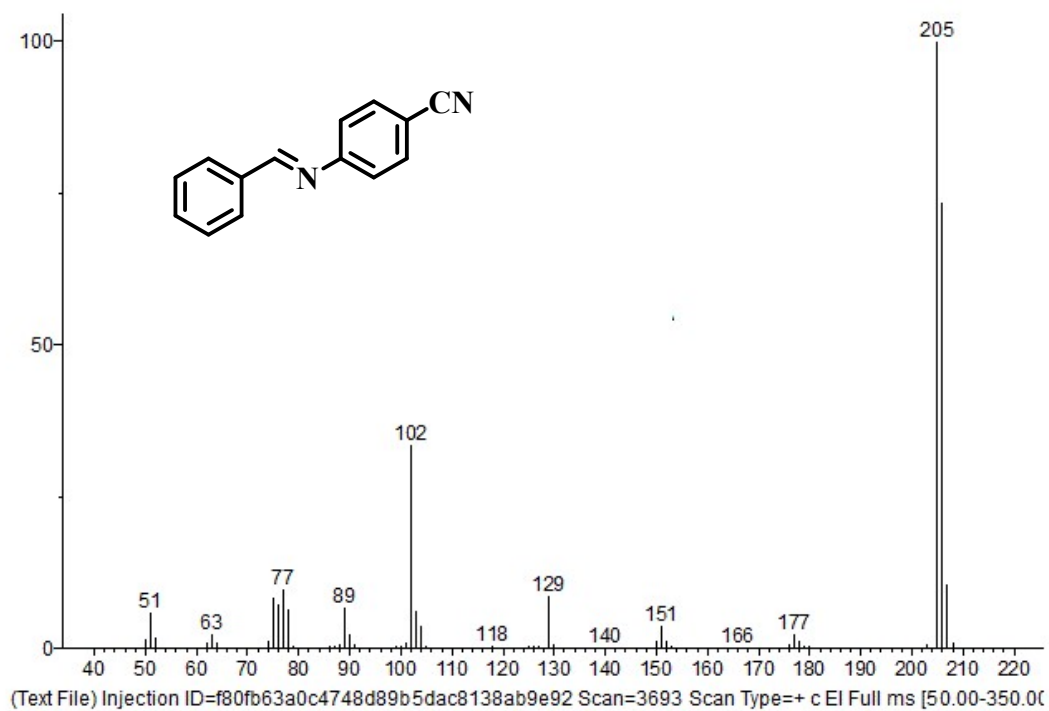

(c14)

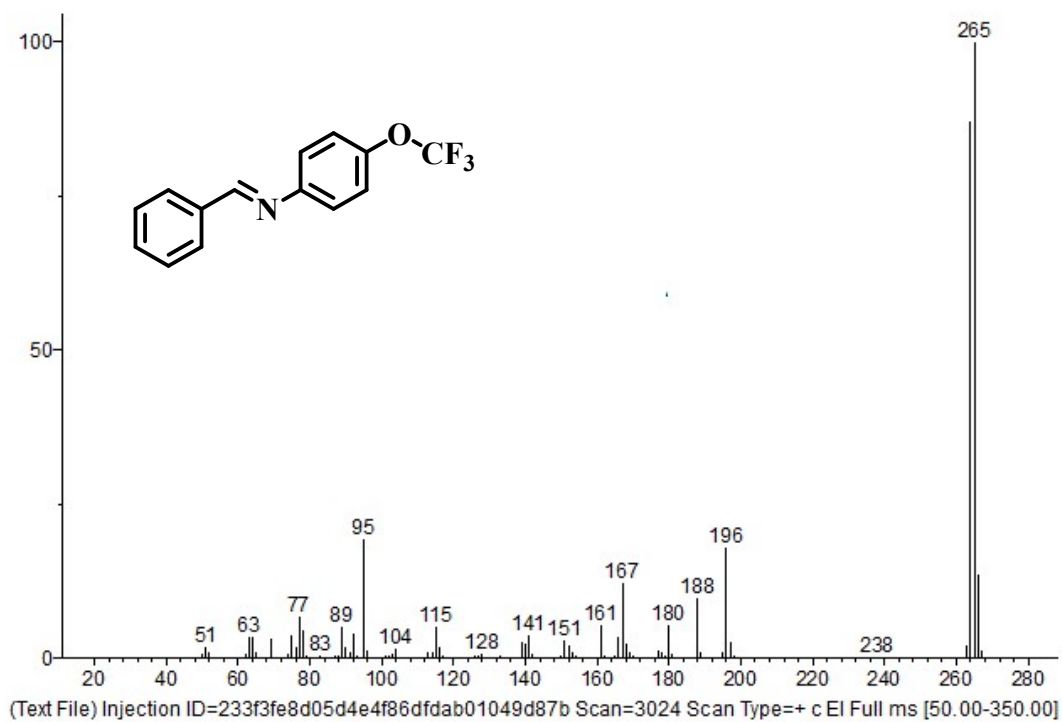

(c15)

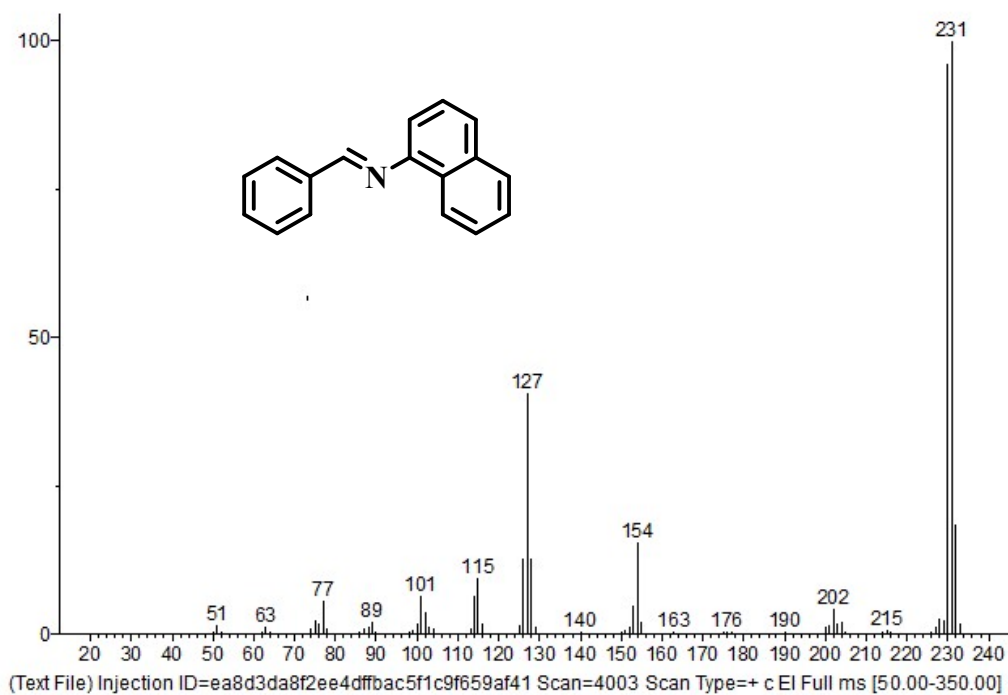

(c16)

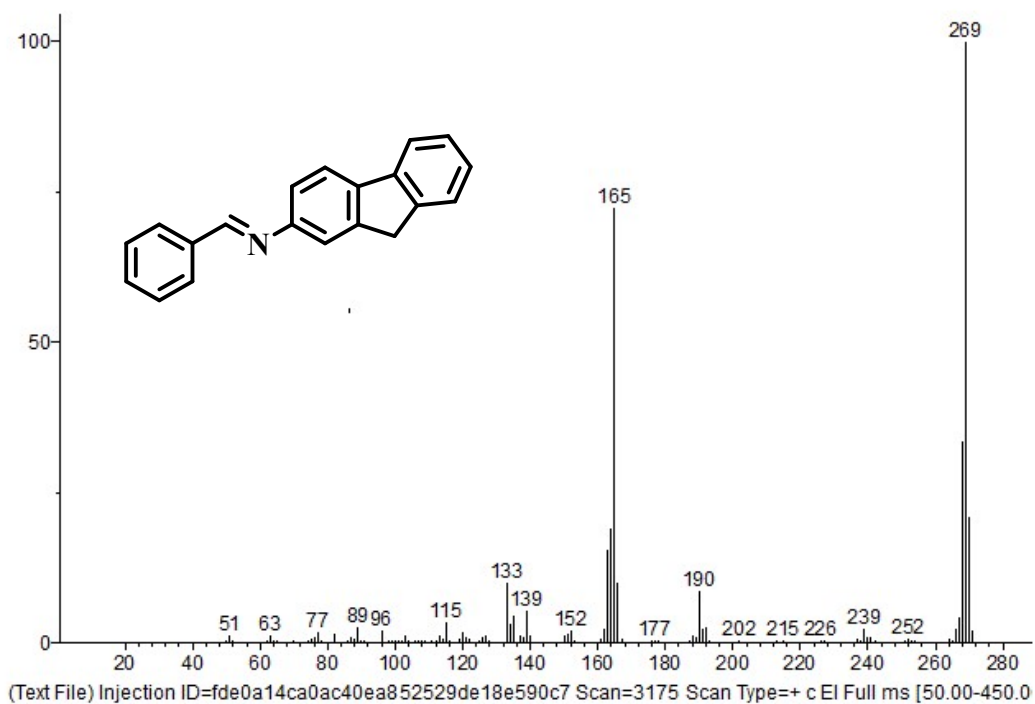



(c17)

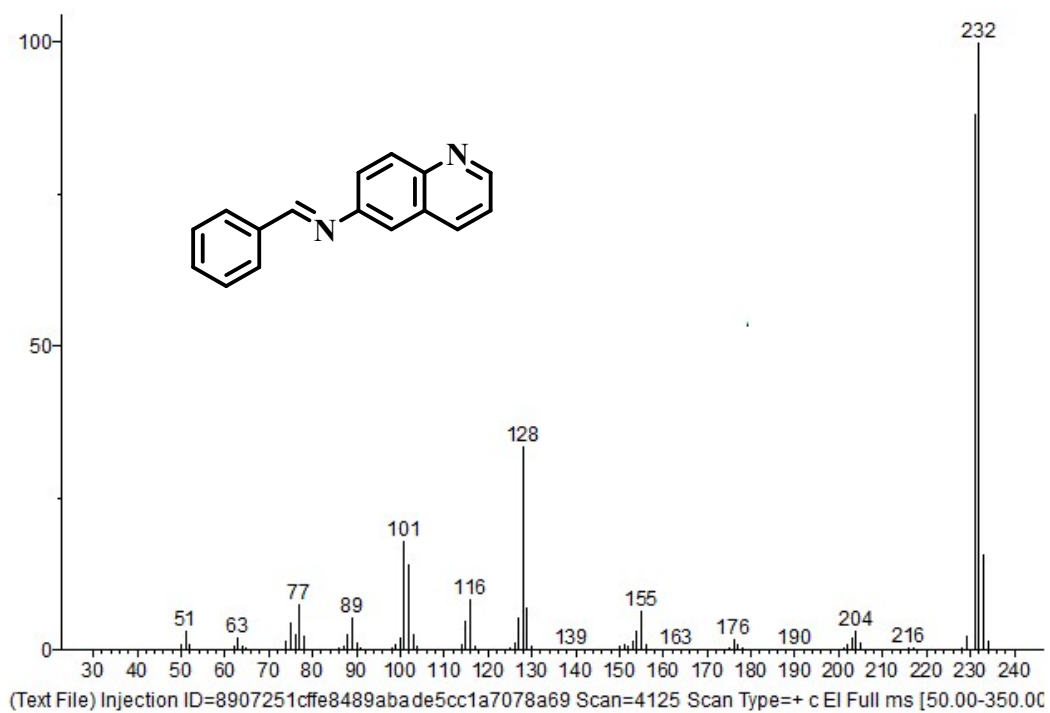

(c18)

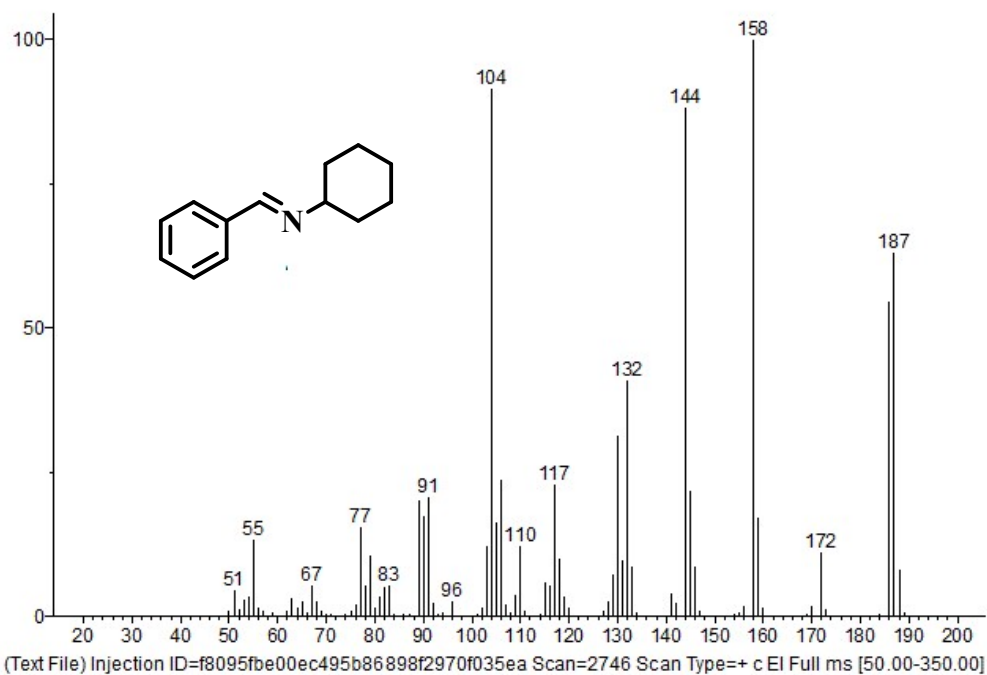

(c19)

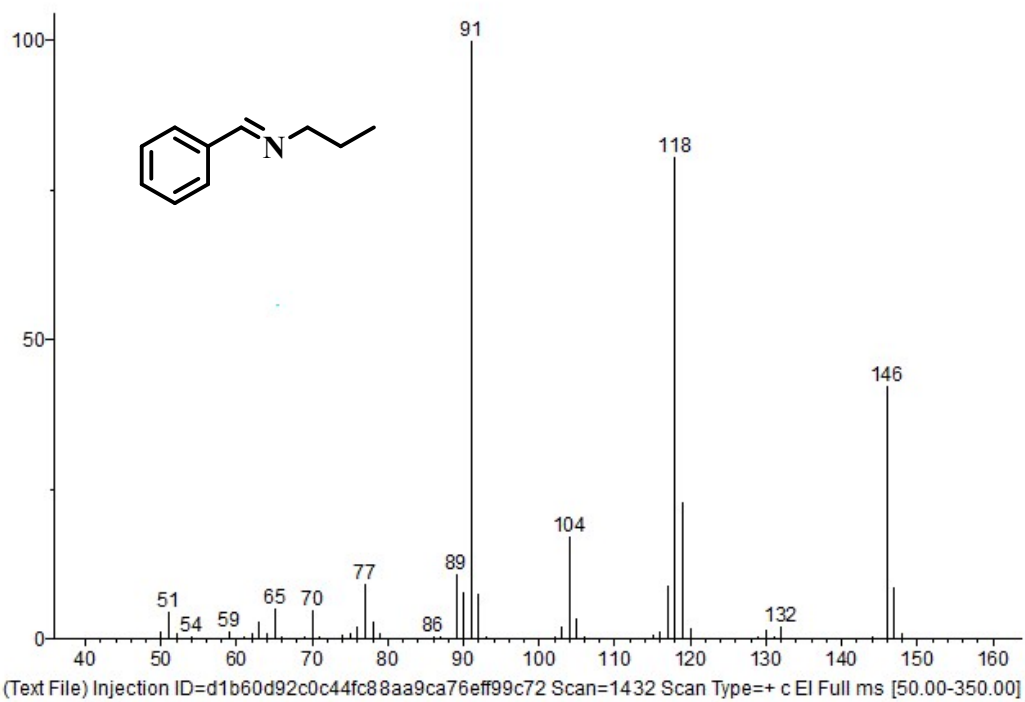

(c20)

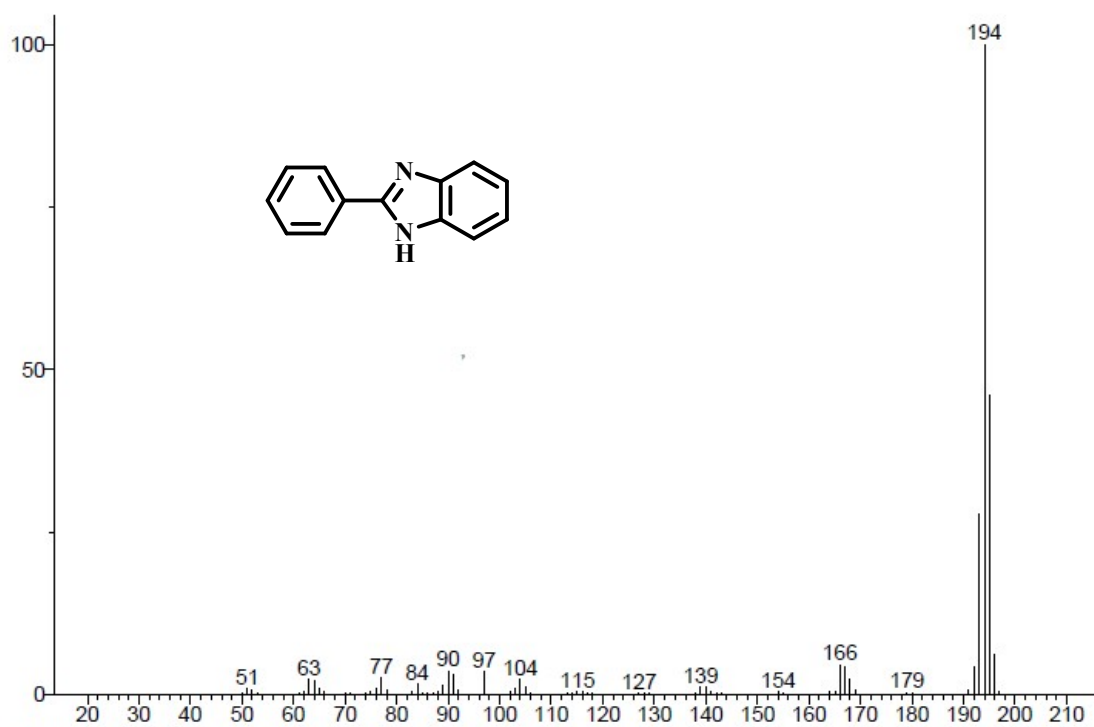

(Text File) Injection ID=3336a207186c42cdb186138c207830b4 Scan=2859 Scan Type=+ c EI Full ms [50.00-450.00]

(c21)

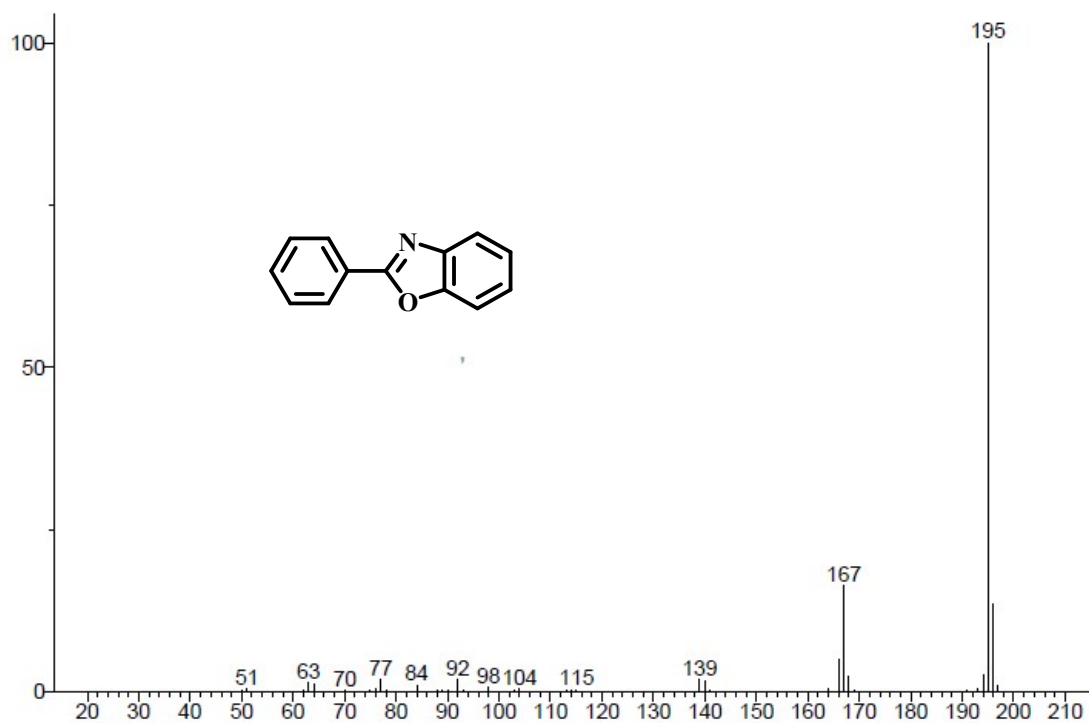

(Text File) Injection ID=62cd49b8c1b64861a2536fb30e10b7ab Scan=3052 Scan Type=+ c EI Full ms [50.00-400.00]

(c22)

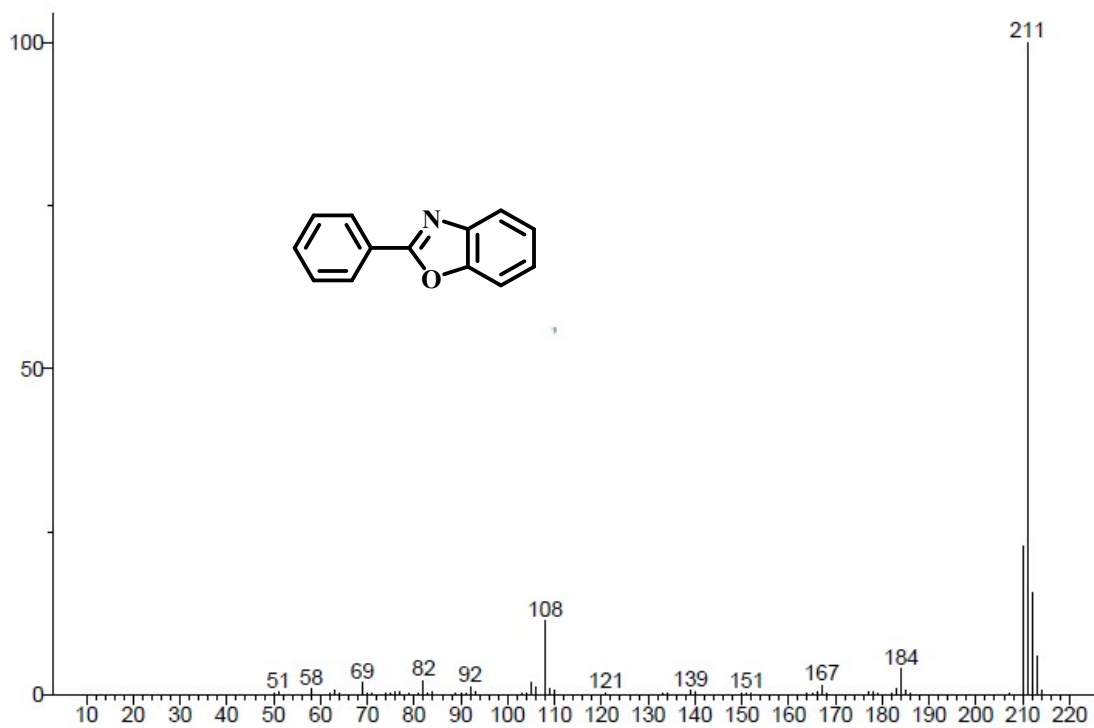

(Text File) Injection ID=db7c2f327ed44b05a0a7c4f76e2b9391 Scan=3434 Scan Type=+ c EI Full ms [50.00-400.00]

(c23)

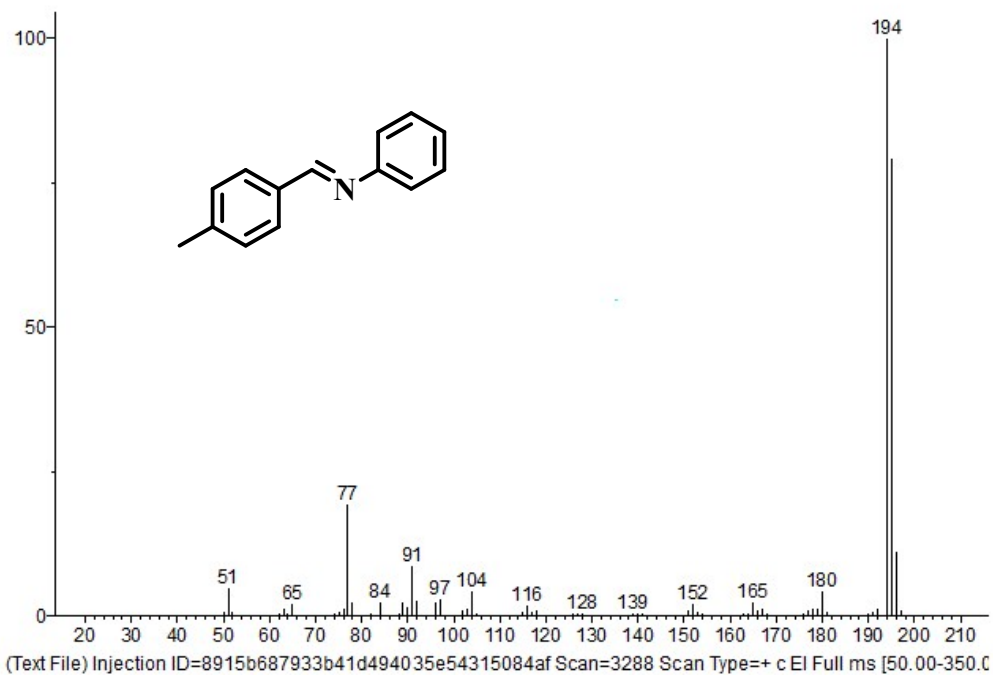

(c24)

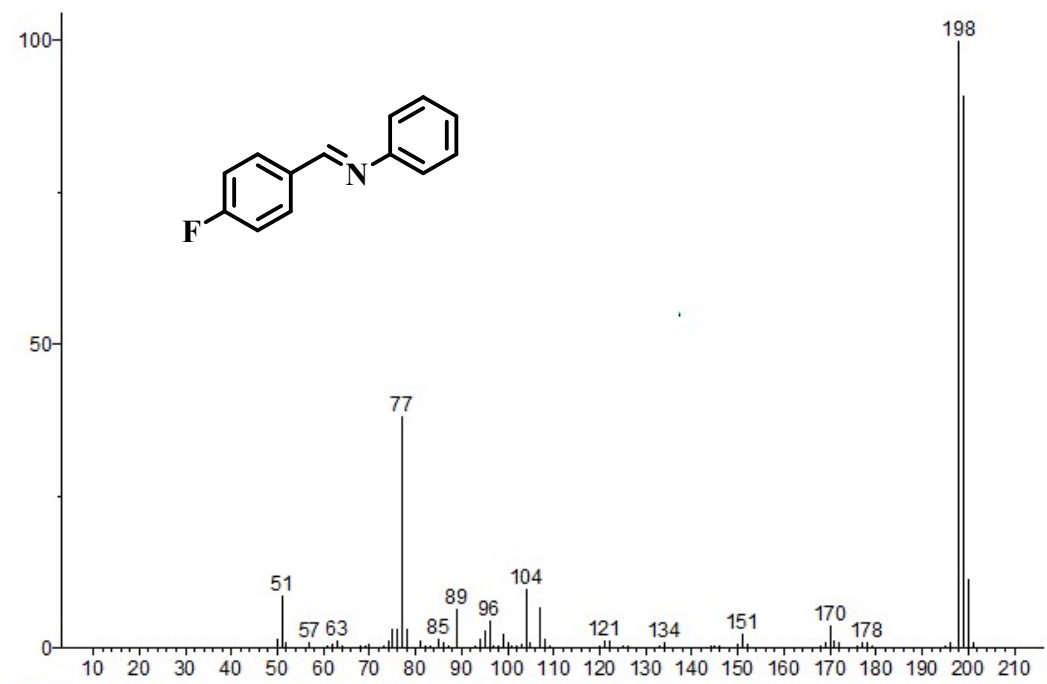

(Text File) Injection ID=69237bc63ce7445ca74f7b88baf65e2d Scan=2988 Scan Type=+ c EI Full ms [50.00-350.00]



(c25)

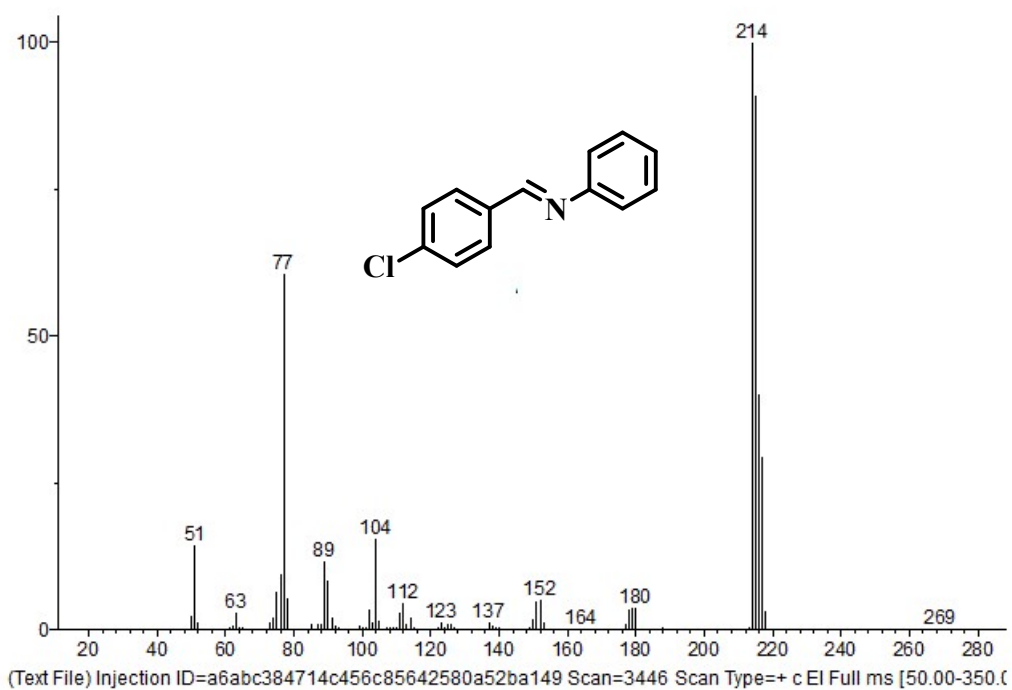

(c26)

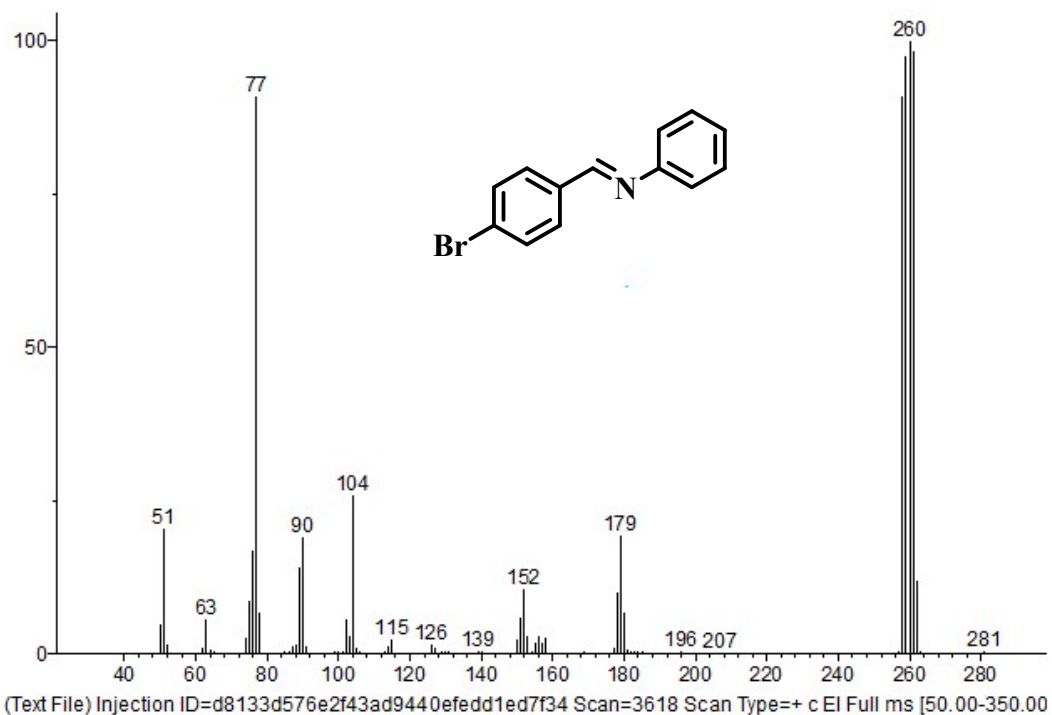

(c27)

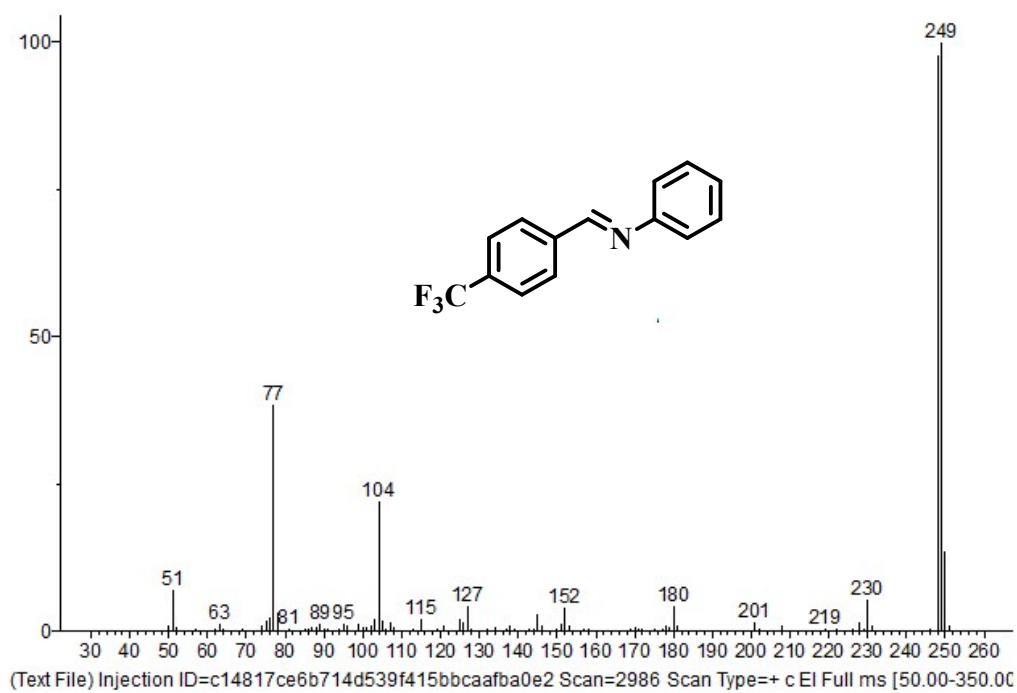

(c28)

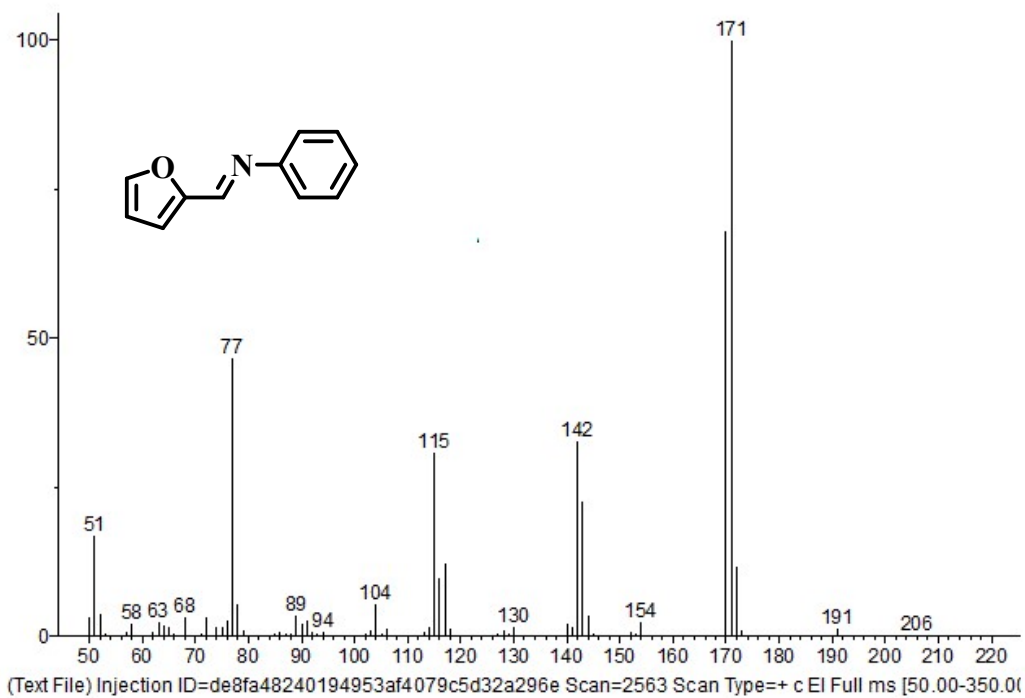

(c29)

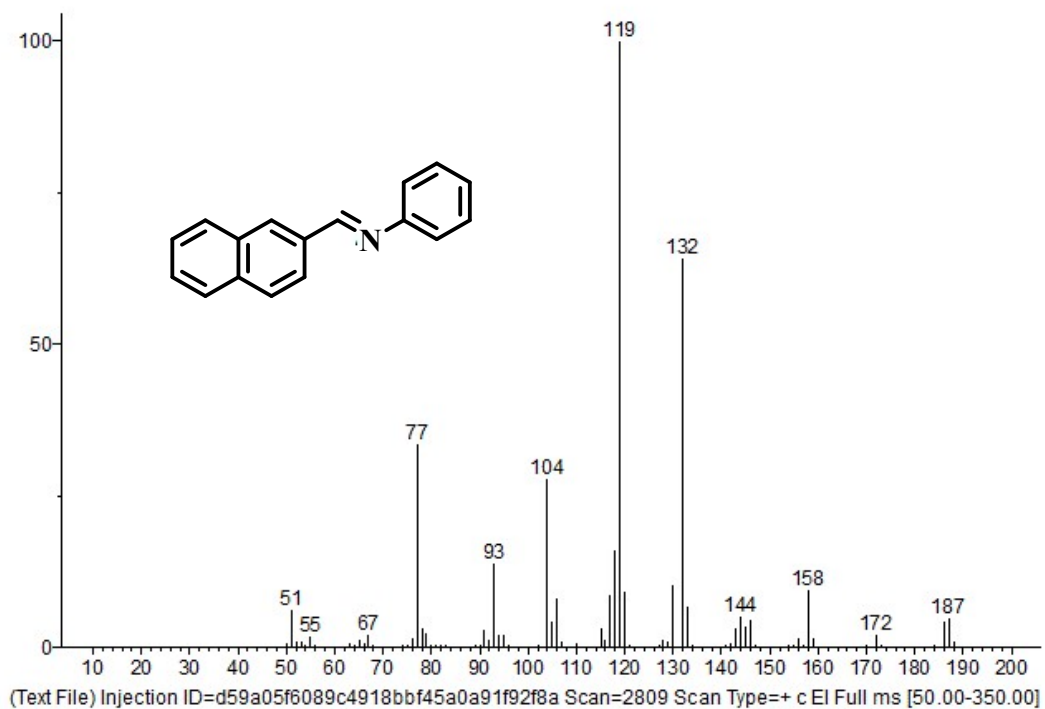

(c30)

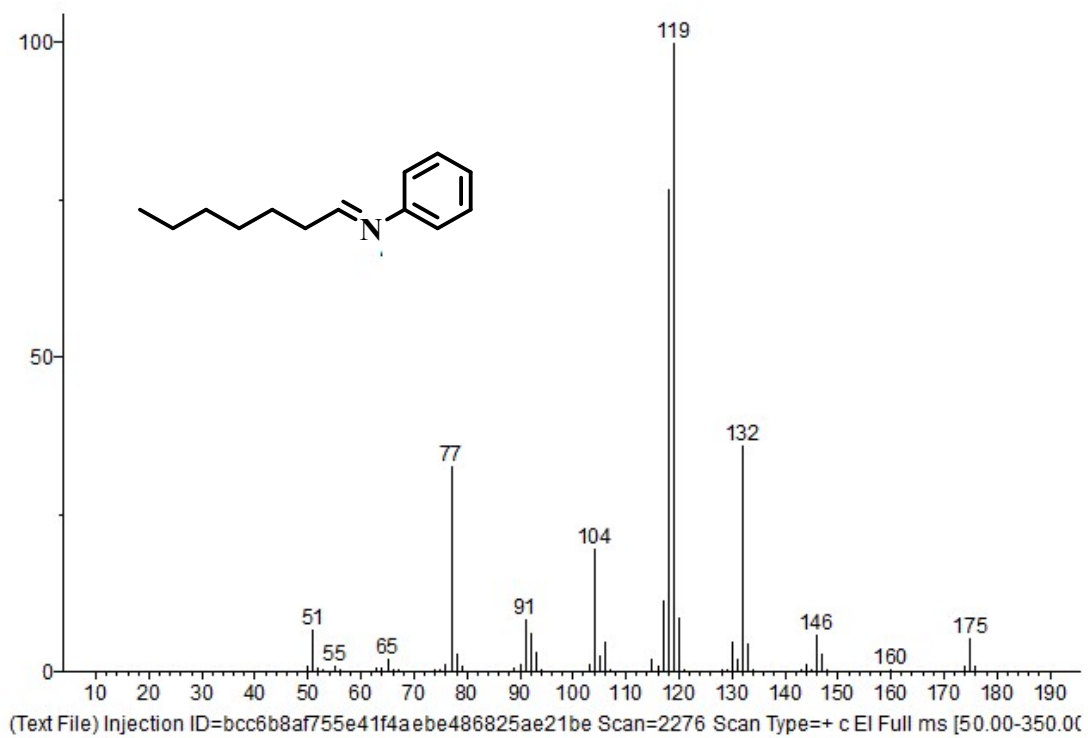

Supplement: d3gc02217j1.pdf [file d3gc02217j1.pdf]
